# Supplementary material for: Sterically controlled 5-exo-dig cyclization enables synthesis of non-benzenoid polycyclic aromatic hydrocarbons with intriguing (anti)aromaticity and diradical properties
Source: Royal Society of Chemistry journal article supplement (doi:10.1039/d6sc00121a), 2026-05-11
Supplement: d6sc00121a1.pdf [file d6sc00121a1.pdf]

## **Sterically Controlled 5-exo-dig Cyclization Enables Synthesis of Non-benzenoid Polycyclic Aromatic Hydrocarbons with Intriguing (Anti)aromaticity and Diradical**

Liangliang Chen,<sup>†,\*</sup> Zhichun Shangguan,<sup>†,2</sup> Tianyu Shi,<sup>†,3</sup> Liyuan Qin,<sup>†,3</sup> Yiyun Zeng,<sup>1</sup> Qinqiu Zhu,<sup>1</sup> Jin Chen,<sup>1</sup> Junhong Liang,<sup>1</sup> Wentao Miao,<sup>1</sup> Yurong He,<sup>1</sup>, Xiaosong Qiu,<sup>1</sup> Xunchang Wang,<sup>1</sup> Deqing Zhang,<sup>3</sup> Renqiang Yang<sup>\*,1</sup>

<sup>1</sup> Key Laboratory of Flexible Optoelectronic Materials and Technology (Ministry of Education), School of Optoelectronic Materials & Technology, Jiangnan University, Wuhan, 430056, China

<sup>2</sup> College of Chemistry and Materials Engineering, Wenzhou University, Key Lab of Biohealth Materials and Chemistry of Wenzhou, Wenzhou, 325027, China.

<sup>3</sup> Beijing National Laboratory for Molecular Sciences, Institute of Chemistry, Chinese Academy of Sciences, Beijing, 100190, China.

[<sup>†</sup>] These authors contribute equally to this work.

### CONTENTS

|                                                                                |    |
|--------------------------------------------------------------------------------|----|
| 1. Materials and characterization techniques .....                             | 2  |
| 2. Synthesis and characterization .....                                        | 4  |
| 3. The <sup>1</sup> H- <sup>1</sup> H NOESY of compounds.....                  | 20 |
| 4. Crystallographic data .....                                                 | 23 |
| 5. Thermogravimetric analysis (TGA) analysis .....                             | 32 |
| 6. Infrared spectra analysis.....                                              | 32 |
| 7. Calculations on electronic properties .....                                 | 33 |
| 8. The stabilities of 1, 2 and 3 .....                                         | 52 |
| 9. The photoluminescence and photothermal conversion of compound 1 and 2 ..... | 53 |
| 10. The oxidation titration experiments .....                                  | 54 |
| 11. The variable-temperature <sup>1</sup> H NMR.....                           | 55 |
| 12. The magnetic properties .....                                              | 58 |
| 13. OFETs fabrication and characterization.....                                | 61 |
| 14. Atomic Cartesian coordinates of the optimized geometry .....               | 63 |
| 15. <sup>1</sup> H NMR and <sup>13</sup> C NMR spectra .....                   | 73 |
| 16. HRMS spectra .....                                                         | 88 |
| 17. Reference.....                                                             | 95 |

# 1. Materials and characterization techniques

All reagents and starting materials were purchased from commercial suppliers and used without further purification unless otherwise specified.

$^1\text{H}$  NMR and  $^{13}\text{C}$  NMR spectra were recorded on AVANCE III 400 MHz, AVANCE III 500 MHz 600MHz and Bruker NEO 700 WB spectrometers. High-resolution mass spectral (HRMS) data were collected on either 9.4T Solarix Mass instrument or APEX II Mass instrument. Elemental analyses (EA) were performed on a Carlo-Erba-1106 instrument. Thermogravimetric analysis (TGA) analysis was carried on a PerkinElmer TGA 8000 Thermogravimetric Analyzer instrument under  $\text{N}_2$  at a heating rate of  $10\text{ }^\circ\text{C}/\text{min}$  from  $50\text{ }^\circ\text{C}$  to  $600\text{ }^\circ\text{C}$ . UV-vis-NIR absorption spectra were collected on a HITACHI UH4150 UV-vis spectrophotometer. Cyclic voltammograms (CV) and differential pulse voltammograms (DPV) measurements were carried out in a conventional three-electrode cell using a glassy carbon as the working electrode, Pt as the counter electrode, and Ag/AgCl (saturated KCl) as the reference electrode on a computer-controlled CHI660C instrument at ambient temperature;  $n\text{-Bu}_4\text{NPF}_6$  (0.1 M in dichloromethane) was used as the supporting electrolyte. For calibration, the redox potential of ferrocene/ferrocenium ( $\text{Fc}/\text{Fc}^+$ ) was measured under the same conditions. HOMO and LUMO energies of these conjugated polymers were estimated with the following equations:  $\text{HOMO} = -(E_{\text{ox}}^{\text{onset}} - E_{\text{Fc}}^{1/2} + 4.8)\text{ eV}$ ,  $\text{LUMO} = -(E_{\text{red}}^{\text{onset}} - E_{\text{Fc}}^{1/2} + 4.8)\text{ eV}$ . The single-crystal X-ray diffraction was carried out on a Rigaku Synergy-R diffractometer. XRD measurements were conducted on a PANalytical Empyrean with X-ray wavelength of  $1.54\text{ \AA}$ . The electron-spin resonance (ESR) spectra of solution and solid were conducted on Bruker E 500. The superconducting quantum interference device (SQUID) magnetometry was measured on MPMS3. The FET device performances were evaluated on a Keithley 4200 SCS semiconductor parameter analyzer.

Density functional theory (DFT) calculations were employed with the Gaussian 09 package.<sup>[S1]</sup> The geometry optimization and frequency analysis were calculated at the (U)B3LYP-D3(BJ)/6-31G(d,p) level of theory.<sup>[S2-S4]</sup> The vertical electronic

excitation energies were calculated using time-dependent density functional theory (TDDFT)<sup>[S5]</sup>, and 30 lowest-lying singlet excited states were considered at (U)B3LYP-D3(BJ)/6-31G(d,p) level of theory. Nucleus-independent chemical shifts (NICS)<sup>[S6]</sup>, the anisotropy of current-induced density (ACID)<sup>[S7]</sup>, and the iso-chemical shielding surfaces (ICSS)<sup>[S8]</sup> were calculated at the (U)B3LYP/6-31G(d,p) level of theory, with the assistance of the Multiwfn program<sup>[S9]</sup>. The diradical character ( $y_0$ ) was calculated according to following equation<sup>[S10]</sup>:

$$y_0 = 1 - \frac{2T}{1 + T^2}$$

where T is defined as:

$$T = \frac{n_{HOMO} - n_{LUMO}}{2}$$

Here,  $n_{HOMO}$  and  $n_{LUMO}$  represent the occupation numbers of the HOMO and LUMO orbitals, respectively.

## 2. Synthesis and characterization

### 2.1 Synthesis and characterization of compound 1

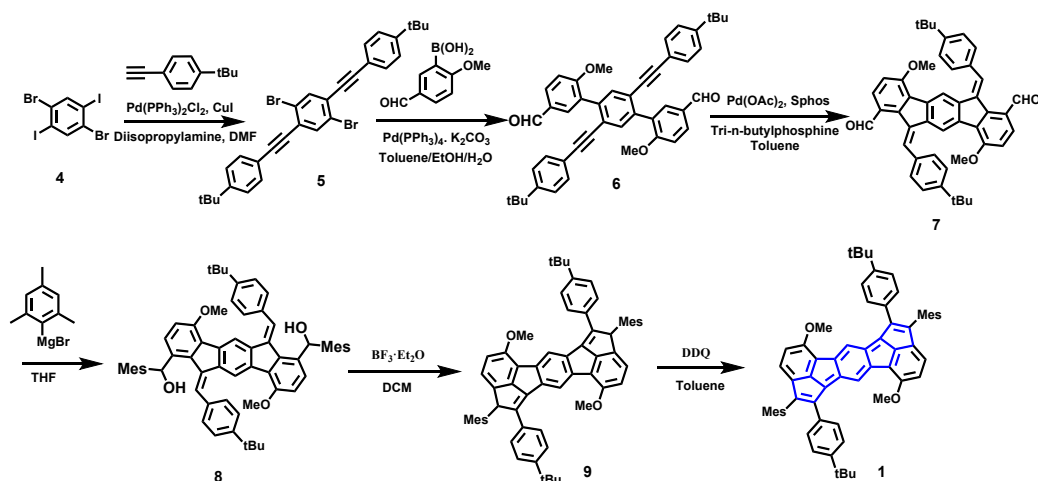

**Scheme S1** The synthetic routes of compound 1

#### Synthesis of compound 5

To a 100 mL two-necked flask equipped with a magnetic stir bar, 1,4-Dibromo-2,5-diiodobenzene (compound **4**, 3 g, 6.15 mmol), Pd(PPh<sub>3</sub>)<sub>2</sub>Cl<sub>2</sub> (440 mg, 0.62 mmol) and CuI (240 mg, 1.24 mmol) were added. The mixture was degassed and charged with nitrogen for three times and then 1-(tert-butyl)-4-ethynylbenzene (1.943 g, 12.3 mmol), diisopropylamine (20 mL) and DMF (20 mL) were added subsequently. The mixture was stirred at room temperature overnight. The reaction was quenched with hydrochloric acid solution (2 M, 60 mL), and the mixture was extracted with dichloromethane (100 mL×3) and washed with hydrochloric acid solution (2 M, 60 mL×3). The organic layer was dried by anhydrous Na<sub>2</sub>SO<sub>4</sub> and concentrated under reduced pressure. The crude product was then purified by flash column chromatography using petroleum ether (b.p. 60-90 °C) as eluent to give compound **5** as a white solid (2.7 g, 80.1% yield).

<sup>1</sup>H NMR (400 MHz, CDCl<sub>3</sub>, 298 K) δ (ppm) 7.77 (s, 2H), 7.51 (d, *J* = 8.4 Hz, 4H), 7.39 (d, *J* = 8.4 Hz, 4H), 1.33 (s, 18H).

<sup>13</sup>C NMR (101 MHz, CDCl<sub>3</sub>, 298 K) δ (ppm) 152.6, 135.9, 131.6, 126.5, 125.5, 123.7, 119.3, 96.9, 86.4, 34.9, 31.2.

HRMS (MALDI- FTICR) *m/z*: [M]<sup>+</sup> calcd for C<sub>30</sub>H<sub>28</sub>Br<sub>2</sub> 546.0552; found 546.0557; err (ppm) -1.0.

#### *Synthesis of compound 6*

To a 250 mL three-necked flask equipped with a magnetic stir bar, compound **5** (1.5 g, 2.75 mmol), 2-Methoxy-5-formylphenylboronic acid (1.98 g, 11mmol), Na<sub>2</sub>CO<sub>3</sub> (1.75 g, 16.5 mmol) and Pd(PPh<sub>3</sub>)<sub>4</sub> (318 mg, 0.275 mmol) were added. The mixture was degassed and charged with nitrogen for three times. Then toluene (80 mL), ethanol (15 mL) and water (15 mL) were added into the flask. The mixture was heated at 110 °C (oil bath) for 15 h. After cooling to room temperature, the solvent was removed by rotary evaporation. The crude product was then purified by flash column chromatography using petroleum ether (b.p. 60-90 °C) and dichloromethane (2/1, v/v) as eluent to give compound **6** as a light-yellow solid. (1.58 g, 87.3% yield).

$^1\text{H}$  NMR (400 MHz,  $\text{CDCl}_3$ , 298 K)  $\delta$  (ppm) 9.97 (s, 2H), 8.01-7.96 (m, 4H), 7.65 (s, 2H), 7.27 (d,  $J = 8.5$  Hz, 4H), 7.15 (d,  $J = 9.1$  Hz, 2H), 7.11 (d,  $J = 8.5$  Hz, 4H), 3.92 (s, 6H), 1.28 (s, 18H).

$^{13}\text{C}$  NMR (101 MHz,  $\text{CDCl}_3$ )  $\delta$  190.8, 162.1, 151.7, 138.9, 133.7, 133.5, 131.5, 131.1, 129.7, 129.5, 125.3, 123.1, 120.0, 111.0, 94.0, 88.0, 56.1, 34.8, 31.1.

HRMS (MALDI- FTICR)  $m/z$ :  $[\text{M}]^+$  calcd for  $\text{C}_{46}\text{H}_{42}\text{O}_4$  658.3077; found 658.3076; err (ppm) -0.2.

### *Synthesis of compound 7*

To a Pyrex tube equipped with a magnetic stir bar, compound **6** (50 mg $\times$ 25, 1.82 mmol),  $\text{Pd}(\text{OAc})_2$  (2.2 mg $\times$ 24, 0.23 mmol), 2-dicyclohexylphosphino-2',6'-dimethoxybiphenyl (Sphos, 6.8 mg $\times$ 24, 0.41 mmol), Tri-*n*-butylphosphine (20  $\mu\text{L}$  $\times$ 24, 1.92 mmol) and toluene (2 mL $\times$ 24) were added sequentially. Then through a freeze-pump-thaw cycle, the tube was charged with nitrogen for three times again. After rising to room temperature, the mixture was heated at 120  $^\circ\text{C}$  for 24 h. After cooling to room temperature, a large amount of precipitation was generated and filtered off. The precipitation was washed with MeOH. The residue was collected and dried under vacuum to afford compound **7** (985 mg, 82.1%), which was directly used for the next step without further purification.

$^1\text{H}$  NMR (400 MHz,  $\text{CDCl}_3$ , 298 K)  $\delta$  (ppm) 10.37 (s, 2H), 8.70 (s, 2H), 8.54 (s, 2H), 7.79 (d,  $J = 8.5$  Hz, 2H), 7.72 -7.66 (m, 4H), 7.57-7.52 (m, 4H), 6.92 (d,  $J = 8.6$  Hz, 2H), 3.83 (s, 6H), 1.43 (s, 18H).

$^{13}\text{C}$  NMR (176 MHz,  $\text{CDCl}_3$ , 298 K)  $\delta$  (ppm) 190.8, 159.2, 151.4, 143.2, 137.2, 137.1, 136.3, 136.0, 134.1, 133.8, 130.0, 128.6, 126.8, 125.4, 119.0, 109.4, 55.5, 34.9, 31.5.

HRMS (MALDI- FTICR)  $m/z$ :  $[\text{M}]^+$  calcd for  $\text{C}_{46}\text{H}_{42}\text{O}_4$  658.3077; found 658.3080; err (ppm) 0.4.

### *Synthesis of compound 9*

First step: To a 100 mL three-necked flask equipped with a magnetic stir bar, compound **7** (250 mg, 0.38 mmol) and THF (30 mL) were added. The mixture was degassed and charged with nitrogen for three times and stirred at 0 °C (ice-water bath) for 5 min. Then, 2-mesitylmagnesium bromide (1 M solution in THF, 3.8 mL, 3.8 mmol) was added to the mixture at 0 °C. After dripping completely, the mixture was warmed to room temperature for 2 h. Then, H<sub>2</sub>O was added to quench the reaction. The residual was extracted by ethyl acetate three times (50 mL×3), and washed with saturated sodium chloride aqueous solution (50 mL×3). The organic layer was dried by anhydrous Na<sub>2</sub>SO<sub>4</sub>. The crude product of compound **8** was obtained by the removal of solvent and used directly for the next step.

HRMS (MALDI- FTICR) m/z: [M]<sup>+</sup> calcd for C<sub>64</sub>H<sub>66</sub>O<sub>4</sub> 898.4955; found 898.4960; err (ppm) -0.5.

Second step: A 100 mL three-necked flask containing the obtained crude product was under vacuum for 15 min. Then, 20 mL of dry dichloromethane (DCM) was added, and 0.6 mL of BF<sub>3</sub>·OEt<sub>2</sub> was added dropwise through the syringe (turned dark immediately). The mixture was stirred for 5 h at room temperature. Then, 5 mL of saturated sodium carbonate (Na<sub>2</sub>CO<sub>3</sub>) solution was added to quench the reaction. The mixture was extracted by DCM (50 mL×3), and washed with saturated sodium chloride aqueous solution (50 mL×3). The organic layer was dried with anhydrous Na<sub>2</sub>SO<sub>4</sub>. The solvent was removed under reduced pressure and the residual, containing a small amount DCM solvent, was added to MeOH to precipitate the solid. The precipitation was filtered and the filter residue was washed with MeOH. After drying under the vacuum, the obtained orange crude product of compound **9** was directly used for the next reaction.

HRMS (MALDI- FTICR) m/z: [M]<sup>+</sup> calcd for C<sub>64</sub>H<sub>62</sub>O<sub>2</sub> 862.4744; found 862.4745; err (ppm) 0.1.

### *Synthesis of compound 1*

To a 100 mL three-necked flask equipped with a magnetic stir bar, compound **9** (crude product obtained from the above-mentioned two steps) and 20 mL dry toluene were added. The mixture was degassed and charged with nitrogen for three times and stirred at 0 °C (ice-water bath) for 3 min. Then, 2,3-dichloro-5,6-dicyano-1,4-benzoquinone (DDQ) (250 mg, 1.1 mmol) in 5 mL dry toluene was added to the mixture and the mixture was stirred under N<sub>2</sub> at room temperature for 1 h (the color of the mixture turned to red-brown). Then H<sub>2</sub>O was added to quench the reaction. The mixture was extracted by DCM (50 mL×3), and washed with saturated sodium chloride aqueous solution (50 mL×3). The organic layer was dried by anhydrous Na<sub>2</sub>SO<sub>4</sub>. The crude product was further purified by a short silica gel column (PE/DCM = 1/1, v/v). Compound **1** was obtained as an army green solid (57 mg, 17.3% yield in three steps).

<sup>1</sup>H NMR (700 MHz, C<sub>2</sub>D<sub>2</sub>Cl<sub>4</sub>, 298 K) δ (ppm) 7.55 (s, 2H), 7.24 (d, *J* = 8.5 Hz, 4H), 7.14 (d, *J* = 8.4 Hz, 4H), 6.84 (s, 4H), 6.63 (d, *J* = 7.6 Hz, 2H), 6.44 (d, *J* = 7.7 Hz, 2H), 3.79 (s, 6H), 2.28 (s, 6H), 2.02 (s, 12H), 1.26 (s, 18H).

<sup>13</sup>C NMR (176 MHz, C<sub>2</sub>D<sub>2</sub>Cl<sub>4</sub>, 298 K) δ (ppm) 155.5, 153.7, 153.3, 149.9, 147.5, 145.4, 137.3, 136.3, 133.7, 132.9, 132.4, 132.1, 128.5, 128.0, 127.3, 125.8, 125.3, 121.8, 116.5, 110.6, 56.0, 34.6, 31.5, 21.5, 20.5.

HRMS (MALDI- FTICR) *m/z*: [M]<sup>+</sup> calcd for C<sub>64</sub>H<sub>60</sub>O<sub>2</sub> 860.4587; found 860.4584; err (ppm) -0.4.

IR (ATR) 3018 cm<sup>-1</sup> (ν<sub>C(sp<sup>2</sup>)-H</sub>), 2923, 2850 cm<sup>-1</sup> (ν<sub>C(sp<sup>3</sup>)-H</sub>).

## 2.2 Synthesis and characterization of compound **2**

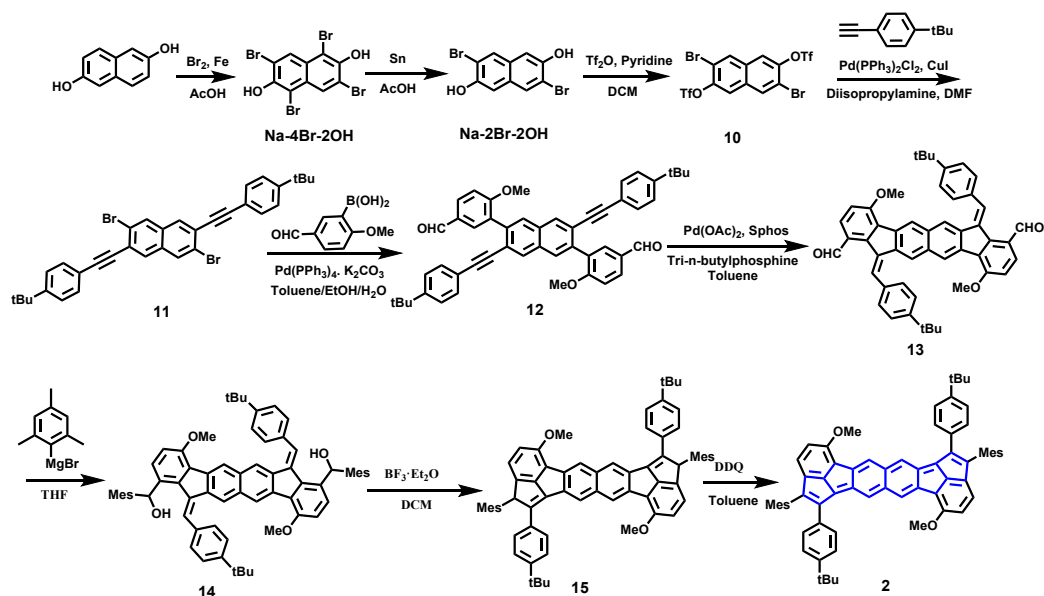

## Scheme S2 The synthetic routes of compound 2

### Synthesis of compound *Na-4Br-2OH*

In a 500 mL three-necked flask equipped with a magnetic stir bar, 2,6-dihydroxynaphthalene (10 g, 62.4 mmol) was dissolved in 250 mL of acetic acid. Elemental bromine (59.8 g, 374 mmol) was then slowly added and the dark orange solution was refluxed for 24 h. Then, iron dust (401.4 mg, 7.16 mmol) was added slowly. The mixture was refluxed for 92 h. After cooling to room temperature, 400 mL of water was added and the precipitate was collected by filtration, washed with acetone and dried under reduced pressure to afford compound *Na-4Br-2OH* as a gray solid (24 g, 80.9 % yield), which was directly used for the next step without further purification.

HRMS (MALDI-ESI)  $m/z$ :  $[\text{M}]^+$  calcd for  $\text{C}_{10}\text{H}_4\text{O}_2\text{Br}_4$  475.6898; found 475.6897; err (ppm) 0.27.

### Synthesis of compound *Na-2Br-2OH*

In a 250 mL three-necked flask equipped with a magnetic stir bar, compound *Na-4Br-2OH* (5.0 g, 10.6 mmol) and tin (2.5 g, 21.2 mmol) were added. The mixture was degassed and charged with nitrogen for three times and  $\text{AcOH}$  (60 mL) was added. The mixture was heated at 120 °C for 48 h. After cooling to room temperature, the mixture

was filtered off. The filtrate was then poured into 300 mL H<sub>2</sub>O and a large amount of precipitation was generated. The precipitation was washed with H<sub>2</sub>O. The residue was collected and dried under vacuum to afford compound **Na-2Br-2OH** (1.83 g, 54.8% yield), which was directly used for the next step without further purification.

<sup>1</sup>H NMR (400 MHz, DMSO-*d*<sub>6</sub>, 298 K) δ (ppm) 10.34 (s, 2H), 7.99 (s, 2H), 7.18 (s, 2H).

<sup>13</sup>C NMR (101 MHz, DMSO-*d*<sub>6</sub>, 298 K) δ (ppm) 150.3, 130.3, 129.2, 114.1, 109.5.

HRMS (MALDI- ESI) *m/z*: [M]<sup>+</sup> calcd for C<sub>10</sub>H<sub>6</sub>O<sub>2</sub>Br<sub>2</sub> 317.8709; found 317.8706; err (ppm) -0.74.

#### *Synthesis of compound 10*

To a 250 mL three-necked flask equipped with a magnetic stir bar, compound **Na-2Br-2OH** (5 g, 15.87 mmol), CH<sub>2</sub>Cl<sub>2</sub> (250 mL) and pyridine (25 mL) were added. The mixture was degassed and charged with nitrogen for three times and then cooled to 0 °C (ice-water bath) for 3 min. Then, Trifluoromethanesulfonic anhydride (13.4 g, 47.6 mmol) was added slowly to the mixture under ice-water bath. After that, it was warmed to room temperature overnight. The reaction was quenched with hydrochloric acid solution (1 M, 200 mL), and the mixture was extracted with dichloromethane (200 mL×3) and washed with hydrochloric acid solution (1 M, 200 mL×3). The organic layer was dried with anhydrous Na<sub>2</sub>SO<sub>4</sub> and concentrated under reduced pressure. The crude product was then purified by flash column chromatography using petroleum ether (b.p. 60-90 °C) and dichloromethane (8/1, v/v) as eluent to give compound **10** as a white solid (4.18 g, 45.5% yield).

<sup>1</sup>H NMR (400 MHz, CDCl<sub>3</sub>, 298 K) δ (ppm) 8.23 (s, 2H), 7.80 (s, 2H).

<sup>13</sup>C NMR (101 MHz, CDCl<sub>3</sub>, 298 K) δ (ppm) 145.7, 133.7, 131.8, 119.8, 118.7 (q, *J* = 322 Hz), 116.1.

HRMS (MALDI- ESI) *m/z*: [M]<sup>+</sup> calcd for C<sub>12</sub>H<sub>4</sub>O<sub>6</sub>Br<sub>2</sub>F<sub>6</sub>S<sub>2</sub> 581.7694; found 581.7697; err (ppm) 0.71.

### *Synthesis of compound 11*

To a 100 mL three-necked flask equipped with a magnetic stir bar, compound **10** (3 g, 5.18 mmol), Pd(PPh<sub>3</sub>)<sub>2</sub>Cl<sub>2</sub> (363 mg, 0.518 mmol) and CuI (198 mg, 1.036 mmol). The mixture was degassed and charged with nitrogen for three times and then 1-(tert-butyl)-4-ethynylbenzene (1.637 g, 10.36 mmol), diisopropylamine (30 mL) and DMF (30 mL) were added subsequently. The mixture was stirred at room temperature overnight. The reaction was quenched with hydrochloric acid solution (1 M, 100 mL), and the mixture was extracted with dichloromethane (100 mL×3) and washed with hydrochloric acid solution (1 M, 100 mL×3). The organic layer was dried with anhydrous Na<sub>2</sub>SO<sub>4</sub> and concentrated under reduced pressure. The crude product was then purified by flash column chromatography using petroleum ether (b.p. 60-90 °C) and dichloromethane (10/1, v/v) as eluent to give compound **11** as a light-yellow solid (2.358 g, 76.4% yield).

<sup>1</sup>H NMR (400 MHz, CDCl<sub>3</sub>, 298 K) δ (ppm) 8.04 (s, 2H), 7.93 (s, 2H), 7.56 (d, *J* = 8.1 Hz, 4H), 7.41 (d, *J* = 8.4 Hz, 4H), 1.34 (s, 18H).

<sup>13</sup>C NMR (101 MHz, CDCl<sub>3</sub>, 298 K) δ (ppm) 152.4, 131.8, 131.6, 131.3, 130.5, 125.5, 124.6, 123.3, 119.7, 95.4, 87.5, 34.9, 31.2.

HRMS (MALDI- FTICR) *m/z*: [M]<sup>+</sup> calcd for C<sub>34</sub>H<sub>30</sub>Br<sub>2</sub> 596.0717; found 596.0708; err (ppm) -1.5.

### *Synthesis of compound 12*

To a 100 mL three-necked flask equipped with a magnetic stir bar, compound **11** (2 g, 3.35 mmol), 2-methoxy-5-formylphenylboronic acid (1.81 g, 10 mmol), K<sub>2</sub>CO<sub>3</sub> (2.311 g, 16.75 mmol) and Pd(PPh<sub>3</sub>)<sub>4</sub> (194 mg, 0.167 mmol) were added. The mixture was degassed and charged with nitrogen for three times. Then toluene (80 mL), ethanol (15 mL) and water (15 mL) were added to the flask. The mixture was heated at 110 °C (oil bath) overnight. After cooling to room temperature, the solvent was removed by rotary evaporation. The crude product was then purified by flash column chromatography using petroleum ether (b.p. 60-90 °C) and dichloromethane (2/1, v/v)

to dichloromethane and ethyl acetate (20:1, v/v) as eluent to give a light-yellow solid **12** (1.227 g, 51.7% yield).

$^1\text{H}$  NMR (400 MHz,  $\text{CDCl}_3$ , 298 K)  $\delta$  (ppm) 9.99 (s, 2H), 8.11 (s, 2H), 8.02 (dt,  $J = 8.5, 1.7$  Hz, 2H), 7.97 (t,  $J = 1.6$  Hz, 2H), 7.83 (s, 2H), 7.28 (d,  $J = 7.6$  Hz, 4H), 7.17 (d,  $J = 8.5$  Hz, 2H), 7.12 (d,  $J = 8.6$  Hz, 4H), 3.88 (s, 6H), 1.29 (s, 18H).

$^{13}\text{C}$  NMR (101 MHz,  $\text{CDCl}_3$ , 298 K)  $\delta$  (ppm) 191.0, 162.5, 151.6, 137.6, 133.4, 131.7, 131.5, 131.1, 130.6, 129.6, 128.4, 125.4, 122.6, 120.1, 110.9, 93.0, 88.4, 56.1, 34.8, 31.1.

HRMS (MALDI- FTICR)  $m/z$ :  $[\text{M}]^+$  calcd for  $\text{C}_{50}\text{H}_{44}\text{O}_4$  708.3234; found 708.3239; err (ppm) 0.7.

### *Synthesis of compound 13*

To a Pyrex tube equipped with a magnetic stir bar, compound **12** (50 mg  $\times$  22, 1.55 mmol),  $\text{Pd}(\text{OAc})_2$  (2.2 mg  $\times$  22, 0.21 mmol), 2-dicyclohexylphosphino-2',6'-dimethoxybiphenyl (Sphos, 6.8 mg  $\times$  22, 0.36  $\mu\text{mol}$ ), Tri-*n*-butylphosphine (20  $\mu\text{L}$   $\times$  22, 1.76 mmol) and toluene (2 mL  $\times$  22) were added sequentially. Then through a freeze-pump-thaw cycle, the tube was charged with nitrogen for three times again. After raising to room temperature, the mixture was heated at 120  $^\circ\text{C}$  for 12 h. After cooling to room temperature, a large amount of precipitation was generated and filtered off. The precipitation was washed with MeOH. The residue was collected and dried under vacuum to afford compound **13** (952 mg, 86.5%), which was directly used for the next step without further purification.

$^1\text{H}$  NMR (400 MHz,  $\text{CDCl}_3$ , 298 K)  $\delta$  (ppm) 10.47 (s, 2H), 8.47 (s, 2H), 8.15 (s, 2H), 7.89 (d,  $J = 8.5$  Hz, 2H), 7.79 (s, 2H), 7.57 (s, 8H), 7.04 (d,  $J = 8.6$  Hz, 2H), 4.08 (s, 6H), 1.49 (s, 18H).

$^{13}\text{C}$  NMR (176 MHz,  $\text{CDCl}_3$ , 298 K)  $\delta$  (ppm) 190.7, 160.0, 151.6, 143.8, 136.5, 136.3, 136.0, 135.0, 134.7, 134.1, 132.4, 128.9, 128.5, 127.1, 126.4, 125.7, 123.7, 123.1, 109.7, 55.7, 34.9, 31.5.

HRMS (MALDI- FTICR) m/z: [M]<sup>+</sup> calcd for C<sub>50</sub>H<sub>44</sub>O<sub>4</sub> 708.3234; found 708.3233; err (ppm) -0.1.

#### *Synthesis of compound 15*

First step: To a 100 mL three-necked flask equipped with a magnetic stir bar, compound **13** (380 mg, 0.53 mmol) and THF (80 mL) were added. The mixture was degassed and charged with nitrogen for three times and stirred at 0 °C (ice-water bath) for 5 min. Then, 2-mesitylmagnesium bromide (1 M solution in THF, 5.3 ml, 5.3 mmol) was added to the mixture at 0 °C. After dripping completely, the mixture was warm to room temperature overnight. H<sub>2</sub>O was added to quench the reaction. The residual was extracted by DCM and washed with saturated sodium chloride aqueous solution. The organic layer was dried with anhydrous Na<sub>2</sub>SO<sub>4</sub>. The crude product of compound **14** was obtained by removal of solvent and used to conduct the next reaction as a yellow solid.

HRMS (MALDI- FTICR) m/z: [M]<sup>+</sup> calcd for C<sub>68</sub>H<sub>68</sub>O<sub>4</sub> 948.5112; found 948.5115; err (ppm) -0.4.

Second step: A 100 mL three-necked flask containing the obtained crude product (**14**) was under vacuum for 15 min, then 40 mL of dry DCM was added, and 0.8 mL of BF<sub>3</sub>·OEt<sub>2</sub> was added dropwise through the syringe (turned to dark brown immediately). The mixture was stirred for 30 min at room temperature. Then 5 mL of saturated sodium carbonate (Na<sub>2</sub>CO<sub>3</sub>) solution was added to quench the reaction, the color of the mixture turned green. The mixture was extracted by DCM, and washed with saturated sodium chloride aqueous solution. The organic layer was dried with anhydrous Na<sub>2</sub>SO<sub>4</sub>. The solvent was removed under reduced pressure and the residue was directly used for the next reaction (compound **15**).

HRMS (MALDI- FTICR) m/z: [M]<sup>+</sup> calcd for C<sub>68</sub>H<sub>64</sub>O<sub>2</sub> 912.4900; found 912.4899; err (ppm) -0.1.

#### *Synthesis of compound 2*

To a 100 mL Schlenk flask equipped with a magnetic stir bar, compound **15** (crude product obtained from the above-mentioned second step) and 30 mL dry toluene were added. Then, through a freeze-pump-thaw cycle, the tube was charged with nitrogen for three times again. After the mixture had thawed, 2,3-dichloro-5,6-dicyano-1,4-benzoquinone (DDQ) (430 mg, 1.89 mmol) in 4 mL dry toluene was added to the mixture and the mixture was stirred under N<sub>2</sub> at room temperature for 2 h (the color of the mixture turned to blue-green). After the reaction finished, the mixture was poured into hexane (300 mL) and a large amount of precipitation was generated and filtered off. The precipitation was washed with MeOH. The crude product was further purified by a short silica gel column (DCM/toluene = 4/1, v/v). Compound **2** was obtained as a purple solid (305 mg, 63.3% yield in three steps).

<sup>1</sup>H NMR (700 MHz, C<sub>2</sub>D<sub>2</sub>Cl<sub>4</sub>, 298 K) δ (ppm) 7.75 (s, 2H), 7.62 (s, 2H), 7.39 (d, *J* = 8.5 Hz, 4H), 7.26 (d, *J* = 8.3 Hz, 4H), 6.95 (s, 4H), 6.81 (d, *J* = 7.5 Hz, 2H), 6.59 (d, *J* = 7.7 Hz, 2H), 4.03 (s, 6H), 2.39 (s, 6H), 2.13 (s, 12H), 1.39 (s, 18H).

<sup>13</sup>C NMR (176 MHz, C<sub>2</sub>D<sub>2</sub>Cl<sub>4</sub>, 298 K) δ (ppm) 154.7, 154.6, 152.3, 149.8, 144.2, 143.7, 137.2, 136.4, 134.4, 133.0, 132.7, 132.5, 130.8, 129.6, 128.5, 127.7, 127.3, 125.4, 122.6, 120.4, 116.7, 110.1, 56.3, 34.7, 31.5, 21.5, 20.6.

HRMS (MALDI- FTICR) *m/z*: [M]<sup>+</sup> calcd for C<sub>68</sub>H<sub>62</sub>O<sub>2</sub> 910.4744; found 910.4743; err (ppm) -0.3.

IR (ATR) 3018 cm<sup>-1</sup> (ν<sub>C(sp<sup>2</sup>)-H</sub>), 2985, 2880 cm<sup>-1</sup> (ν<sub>C(sp<sup>3</sup>)-H</sub>).

### 2.3 Synthesis and characterization of compound 3

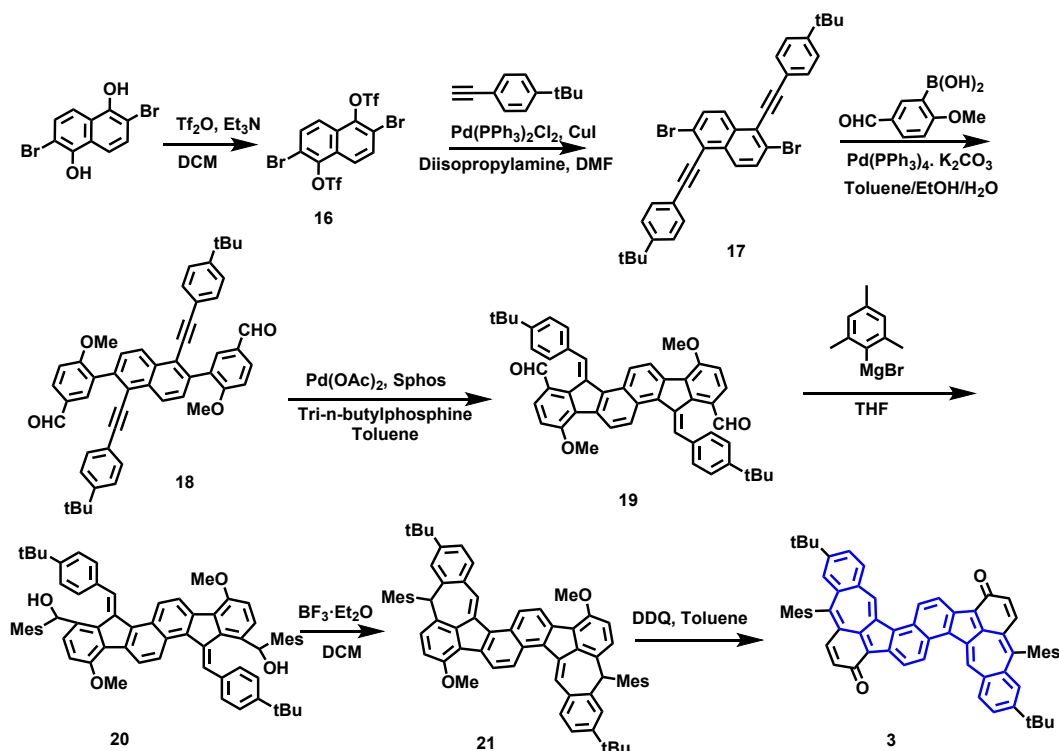

**Scheme S3** The synthetic routes of compound **3**

#### Synthesis of compound **16**

In a 250 mL three-necked flask equipped with a magnetic stir bar, 2,6-dibromo-1,5-dihydroxynaphthalene (10 g, 31.4 mmol),  $\text{CH}_2\text{Cl}_2$  (100 mL) and pyridine (10 mL) were added. The mixture was degassed and charged with nitrogen for three times and then cooled to 0 °C (ice-water bath) for 3 min. Then, Trifluoromethanesulfonic anhydride (26.6 g, 94.3 mmol) was added slowly to the mixture under an ice-water bath. After that, it was warmed to room temperature for 12 h. The reaction was quenched with hydrochloric acid solution (1 M, 100 mL), and the mixture was extracted with dichloromethane (100 mL  $\times$  3) and washed with water (100 mL  $\times$  3). The organic layer was dried with anhydrous  $\text{Na}_2\text{SO}_4$  and concentrated under reduced pressure. The crude product was then purified by flash column chromatography using petroleum ether (b.p. 60-90 °C) and dichloromethane (10:1, v/v) as eluent to give a white solid **16** (11.904 g, 65.5% yield).

$^1\text{H}$  NMR (400 MHz,  $\text{CDCl}_3$ , 298 K)  $\delta$  (ppm): 8.02 (d,  $J$  = 9.0 Hz, 2H), 7.88 (d,  $J$  = 9.1 Hz, 2H).

$^{13}\text{C}$  NMR (101 MHz,  $\text{CDCl}_3$ , 298 K)  $\delta$  (ppm): 142.5, 133.1, 128.6, 122.9, 122.9, 118.6 (q, 12.8 Hz), 116.6.

#### *Synthesis of compound 17*

In a 250 mL three-necked flask equipped with a magnetic stir bar, compound **16** (5.2 g, 8.9 mmol),  $\text{Pd}(\text{PPh}_3)_2\text{Cl}_2$  (627 mg, 0.9 mmol) and  $\text{CuI}$  (343 mg, 1.8 mmol). The mixture was degassed and charged with nitrogen for three times and then 1-(tert-butyl)-4-ethynylbenzene (2.8 g, 17.9 mmol), diisopropylamine (20 mL) and DMF (50 mL) were added subsequently. The mixture was stirred at room temperature overnight. The reaction was quenched with hydrochloric acid solution (3 M, 50 mL), and the mixture was extracted with dichloromethane (100 mL $\times$ 3) and washed with hydrochloric acid solution (3 M, 50 mL $\times$ 3). The organic layer was dried by anhydrous  $\text{Na}_2\text{SO}_4$  and concentrated under reduced pressure. The crude product was then purified by flash column chromatography using petroleum ether (b.p. 60-90 °C) as eluent to give a light-yellow solid **17** (4.6 g, 85.3% yield).

$^1\text{H}$  NMR (400 MHz,  $\text{CDCl}_3$ , 298 K)  $\delta$  (ppm) 8.22 (d,  $J = 8.9$  Hz, 2H), 7.75 (d,  $J = 8.9$  Hz, 2H), 7.65-7.60 (m, 4H), 7.47-7.42 (m, 4H), 1.36 (s, 18H).

$^{13}\text{C}$  NMR (101 MHz,  $\text{CDCl}_3$ , 298 K)  $\delta$  (ppm) 152.5, 132.9, 131.6, 131.6, 131.3, 127.6, 125.6, 125.5, 123.2, 119.7, 100.2, 85.4, 34.9, 31.2.

HRMS (MALDI- FTICR)  $m/z$ :  $[\text{M}]^+$  calcd for  $\text{C}_{34}\text{H}_{30}\text{Br}_2$  596.0708; found 596.0716; err (ppm) 1.3.

#### *Synthesis of compound 18*

In a 250 mL three-necked flask equipped with a magnetic stir bar, compound **17** (3 g, 5 mmol), 2-Methoxy-5-formylphenylboronic acid (2.7 g, 15 mmol),  $\text{K}_2\text{CO}_3$  (3.5 g, 25 mmol) and  $\text{Pd}(\text{PPh}_3)_4$  (290 mg, 0.25 mmol) were added. The mixture was degassed and charged with nitrogen for three times. Then toluene (120 mL), ethanol (20 mL) and water (20 mL) were added into the flask. The mixture was heated at 110 °C (oil bath) overnight. After cooling to room temperature, the solvent was removed by rotary evaporation. The crude product was then purified by flash column

chromatography using petroleum ether (b.p. 60-90 °C) and dichloromethane (2/1, v/v) as eluent to give a light-yellow solid **18** (1.6 g, 44.1% yield).

<sup>1</sup>H NMR (400 MHz, CDCl<sub>3</sub>, 298 K) δ (ppm) 10.00 (s, 2H), 8.57 (d, *J* = 8.5 Hz, 2H), 8.09 (d, *J* = 2.2 Hz, 2H), 8.01 (dd, *J* = 8.5, 2.1 Hz, 2H), 7.64 (d, *J* = 8.5 Hz, 2H), 7.34-7.31(m, 4H), 7.26-7.22 (m, 4H), 7.18 (d, *J* = 8.6 Hz, 2H), 3.90 (s, 6H), 1.31 (s, 18H).

<sup>13</sup>C NMR (101 MHz, CDCl<sub>3</sub>, 298 K) δ (ppm) 191.0, 162.2, 151.8, 138.8, 134.1, 132.6, 131.5, 131.1, 130.8, 129.5, 128.9, 126.6, 125.4, 120.9, 120.2, 111.1, 98.4, 86.1, 56.1, 34.8, 31.2.

HRMS (MALDI- FTICR) *m/z*: [M]<sup>+</sup> calcd for C<sub>50</sub>H<sub>44</sub>O<sub>4</sub> 708.3234; found 708.3231; err (ppm) -0.4.

#### *Synthesis of compound 19*

To a Pyrex tube equipped with a magnetic stir bar, compound **18** (50 mg × 20, 1.41 mmol), Pd(OAc)<sub>2</sub> (2.2 mg × 20, 0.19 mmol), 2-dicyclohexylphosphino-2',6'-dimethoxybiphenyl (Sphos, 6.8 mg × 20, 0.32 mmol), Tri-*n*-butylphosphine (20 μL × 20, 1.6 mmol) and toluene (2 mL × 20) were added sequentially. Then, through a freeze-pump-thaw cycle, the tube was charged with nitrogen for three times again. After raising to room temperature, the mixture was heated at 120 °C for 12 h. After cooling to room temperature, a large amount of precipitation was generated and filtered off. The precipitation was washed with MeOH. The residue was collected and dried under vacuum to afford compound **19** (967 mg, 96.7%), which was directly used for the next step without further purification.

<sup>1</sup>H NMR (400 MHz, CDCl<sub>3</sub>, 298 K) δ (ppm) 9.74 (s, 2H), 8.63 (d, *J* = 8.8 Hz, 2H), 8.47 (d, *J* = 8.7 Hz, 2H), 8.23 (s, 2H), 7.70 (d, *J* = 8.6 Hz, 2H), 7.37 (s, 8H), 7.02 (d, *J* = 8.6 Hz, 2H), 4.15 (s, 6H), 1.33 (s, 18H).

<sup>13</sup>C NMR (101 MHz, CDCl<sub>3</sub>, 298 K) δ (ppm) 188.3, 159.2, 152.1, 142.2, 138.5, 138.2, 137.3, 133.9, 129.4, 128.7, 127.7, 127.3, 126.3, 125.1, 124.8, 123.2, 110.9, 55.8, 34.8, 31.2.

HRMS (MALDI- FTICR) m/z:  $[M]^+$  calcd for  $C_{50}H_{44}O_4$  708.3234; found 708.3232; err (ppm) -0.2.

### *Synthesis of compound 3*

First step: To a 50 mL three-necked flask equipped with a magnetic stir bar, compound **9** (200 mg, 0.28 mmol) and THF (25 mL) were added. The mixture was degassed and charged with nitrogen for three times and stirred at 0 °C (ice-water bath) for 5 min. Then, 2-Mesitylmagnesium bromide (1 M solution in THF, 4.5 mL, 4.5 mmol) was added to the mixture at 0 °C. After dripping completely, the mixture was warm to room temperature overnight. Then, H<sub>2</sub>O was added to quench the reaction. The residual was extracted by DCM, and washed with saturated sodium chloride aqueous solution. The organic layer was dried with anhydrous Na<sub>2</sub>SO<sub>4</sub>. The crude product of compound **20** was obtained by removal of solvent and used to conduct the next reaction as a yellow solid.

HRMS (MALDI- FTICR) m/z:  $[M]^+$  calcd for  $C_{68}H_{68}O_4$  948.5112; found 948.5118; err (ppm) 0.7.

Second step: A 100 mL three-necked flask containing the obtained crude product was under vacuum for 15 min, then 25 mL of dry DCM was added, 0.4 mL of BF<sub>3</sub>·OEt<sub>2</sub> was added dropwise through syringe (turned to dark brown immediately) under 0 °C (ice-water bath). Then, the mixture was kept stirred for 4 h at 50 °C. Then 2 mL of saturated sodium carbonate (Na<sub>2</sub>CO<sub>3</sub>) solution was added to quench the reaction. The mixture was extracted by DCM, and washed with saturated sodium chloride aqueous solution. The organic layer was dried with anhydrous Na<sub>2</sub>SO<sub>4</sub>. The solvent was removed under reduced pressure and the residue was directly used for the next reaction (compound **21**).

HRMS (MALDI- FTICR) m/z:  $[M]^+$  calcd for  $C_{68}H_{64}O_2$  912.4900; found 912.4899; err (ppm) -0.2.

Third step: To a 50 mL Schlenk flask equipped with a magnetic stir bar, compound **21** (crude product obtained from the second step) and 15 mL dry toluene were added.

Then, through a freeze-pump-thaw cycle, the tube was charged with nitrogen for three times. After the mixture had thawed, 2,3-dichloro-5,6-dicyano-1,4-benzoquinone (DDQ) (71.8 mg, 0.32 mmol) in 2 mL dry toluene was added to the mixture and the mixture was stirred under N<sub>2</sub> at room temperature for 0.5 h. Then, H<sub>2</sub>O (5 mL) and Et<sub>3</sub>N (2 mL) were added to quench the reaction. The residual was extracted by DCM, and washed with saturated sodium chloride aqueous solution. The organic layer was dried with anhydrous Na<sub>2</sub>SO<sub>4</sub> and the solvent was removed by rotary evaporation. The crude product was then purified by flash column chromatography using dichloromethane and methanol (1/0~20/1, v/v) as eluent to give a brown solid of **3** (19 mg, 19.7% yield).

<sup>1</sup>H NMR (700 MHz, CDCl<sub>3</sub>, 298 K) δ (ppm) 9.85 (s, 2H), 9.32 (d, *J* = 8.6 Hz, 2H), 9.23 (d, *J* = 8.5 Hz, 2H), 8.46 (d, *J* = 8.2 Hz, 2H), 8.02 (dd, *J* = 8.1, 1.9 Hz, 2H), 7.89 (d, *J* = 1.9 Hz, 2H), 7.54 (d, *J* = 10.0 Hz, 2H), 7.14 (s, 4H), 6.93 (d, *J* = 10.0 Hz, 2H), 2.50 (s, 6H), 1.88 (s, 12H), 1.25 (s, 18H).

<sup>13</sup>C NMR (176 MHz, CDCl<sub>3</sub>, 298 K) δ (ppm) 154.4, 141.6, 140.3, 139.2, 138.2, 138.0, 137.9, 137.6, 137.4, 136.1, 135.9, 134.2, 133.4, 130.3, 130.2, 129.1, 129.0, 128.9, 128.6, 126.7, 126.0, 123.7, 35.3, 30.9, 21.3, 20.1.

HRMS (MALDI- FTICR) *m/z*: [M]<sup>+</sup> calcd for C<sub>66</sub>H<sub>56</sub>O<sub>2</sub> 880.4274; found 880.4269; err (ppm) 0.6.

IR (ATR) 3021 cm<sup>-1</sup> (ν<sub>C(sp<sup>2</sup>)-H</sub>), 2927, 2853 cm<sup>-1</sup> (ν<sub>C(sp<sup>3</sup>)-H</sub>), 1613 cm<sup>-1</sup> (ν<sub>C=O</sub>).

#### 2.4 The proposed mechanism of demethylation for the synthesis of **3** after treating **21** with DDQ<sup>[11]</sup>

As shown in Scheme S4, first, the electron-rich methoxy-substituted substrate (**21**) donates an electron to the electrophilic quinone oxidant (DDQ), forming a charge-transfer complex (**3-1**). This is followed by the abstraction of a benzylic proton (highlighted in red) by the carbonyl oxygen of DDQ and forming the oxonium ion intermediate (**3-2**). Subsequent hydrolysis, mediated by water, cleaves the C-O bond, converting the quinone into a phenol derivative and forming **3-3**. Then, the single carbonyl-substituted compound of **3-4** was yielded by releasing the methoxy group as methanol (MeOH). After the second oxidative cyclization event occurs, we can obtain the final product of **3**.

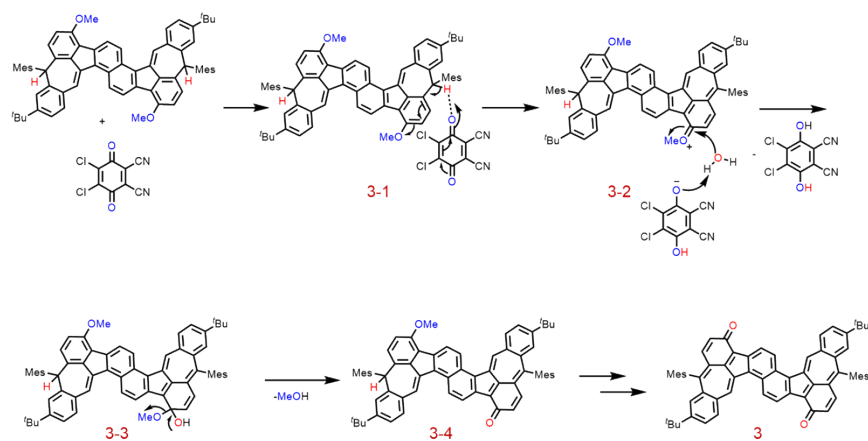

**Scheme S4** The proposed mechanism of demethylation for the synthesis of **3** after treating **21** with DDQ.

### 3. The $^1\text{H}$ - $^1\text{H}$ NOESY of compounds

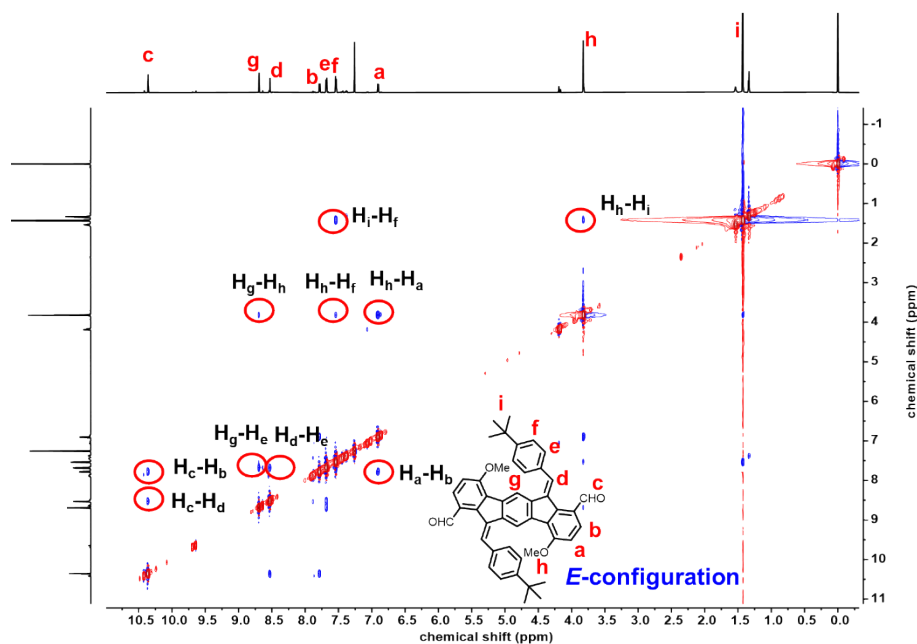

**Figure S1** The NOESY of compound 7 (700 MHz,  $\text{C}_2\text{D}_2\text{Cl}_4$ , 298 K).

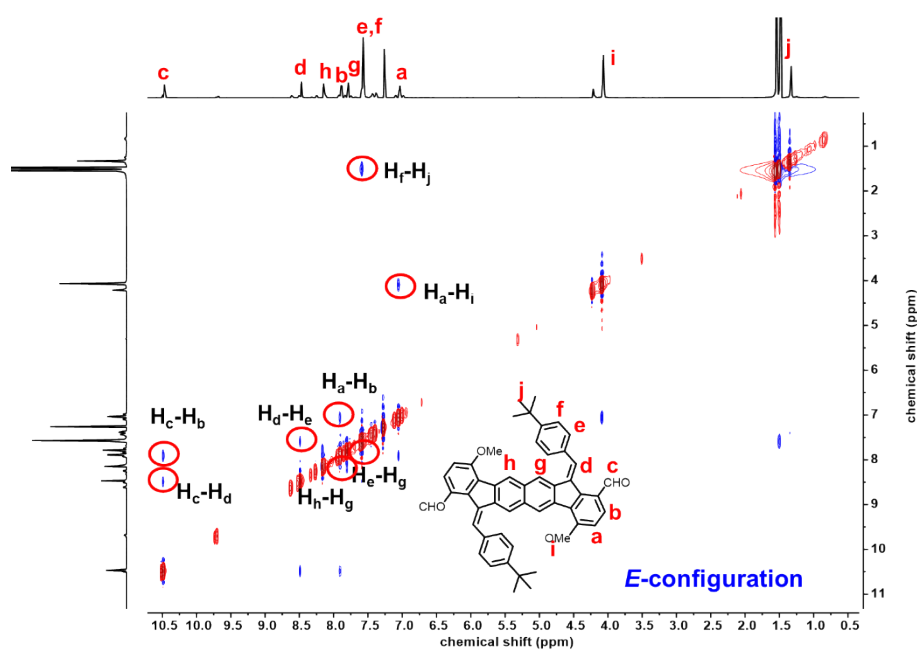

**Figure S2** The NOESY of compound 13 (700 MHz,  $\text{C}_2\text{D}_2\text{Cl}_4$ , 298 K).

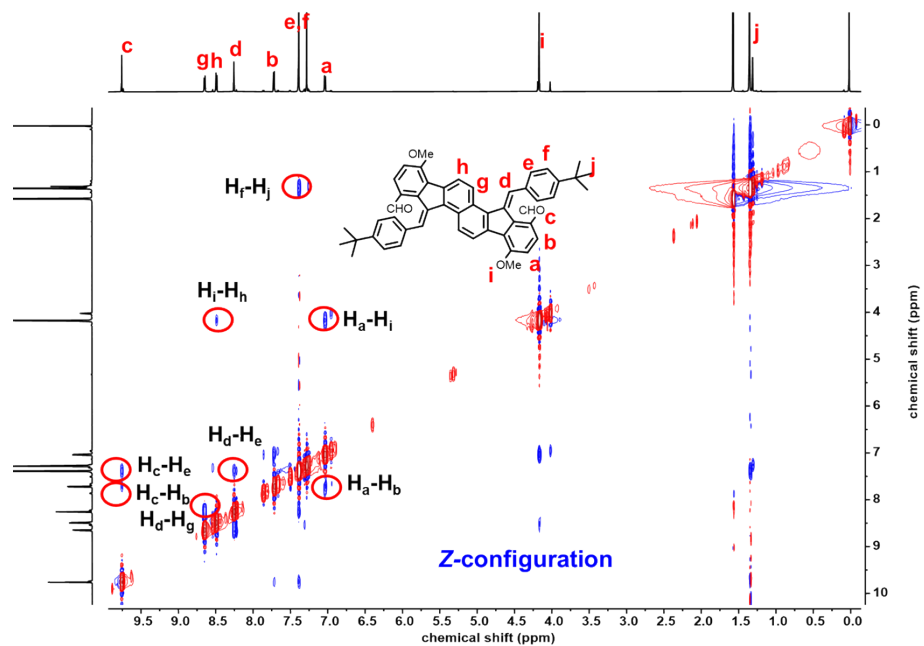

**Figure S3** The NOESY of compound **19** (700 MHz,  $C_2D_2Cl_4$ , 298 K).

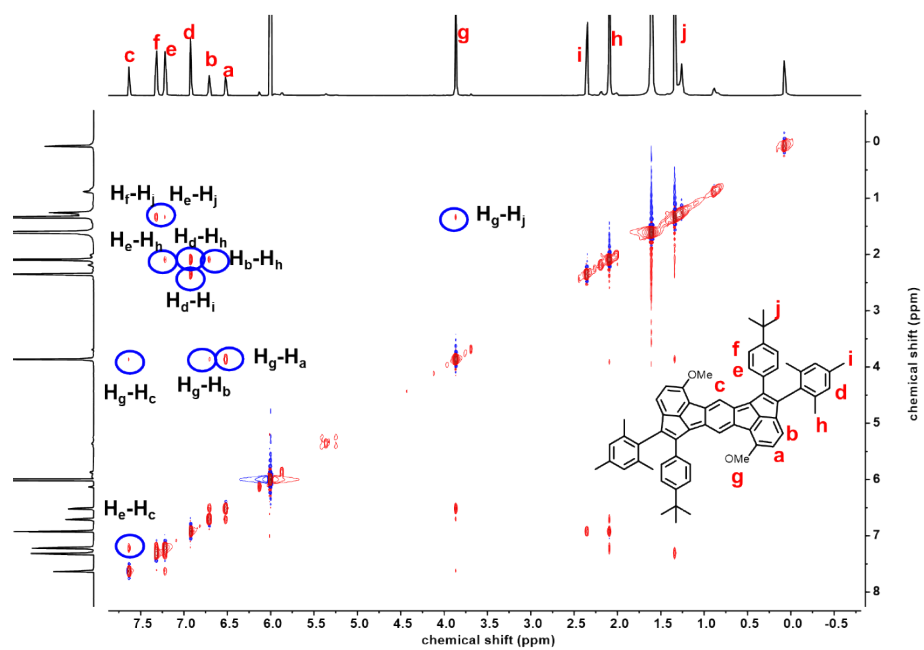

**Figure S4** The NOESY of compound **1** (700 MHz,  $C_2D_2Cl_4$ , 298 K).

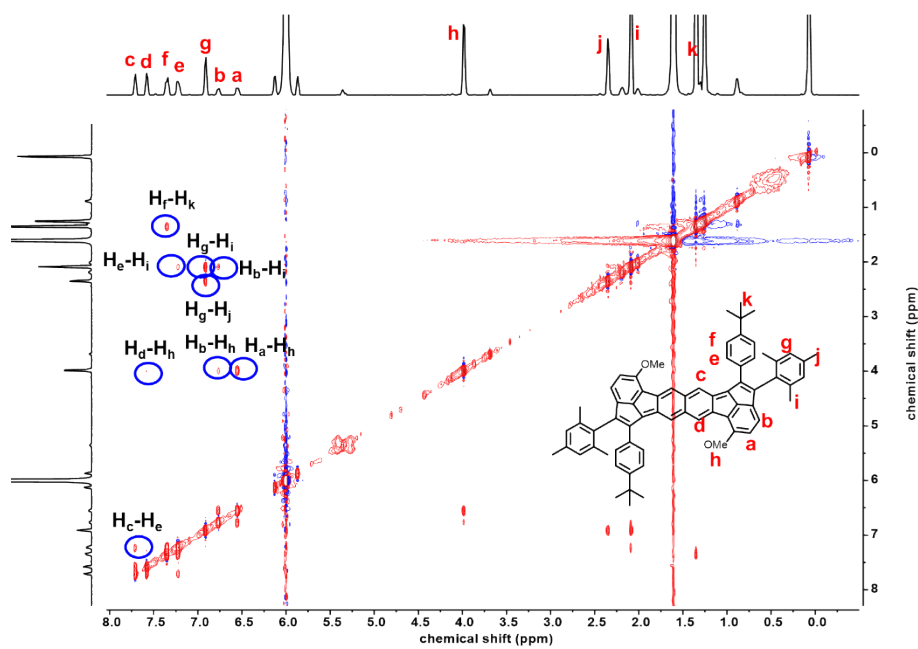

**Figure S5** The NOESY of compound **2** (700 MHz,  $C_2D_2Cl_4$ , 298 K).

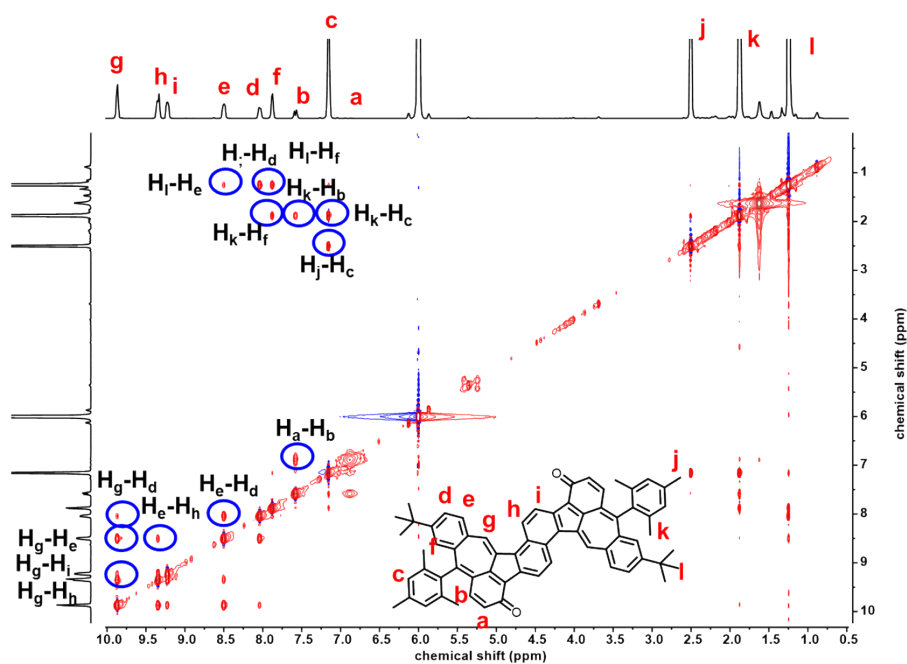

**Figure S6** The NOESY of compound **3** (700 MHz,  $C_2D_2Cl_4$ , 298 K).

## 4. Crystallographic data

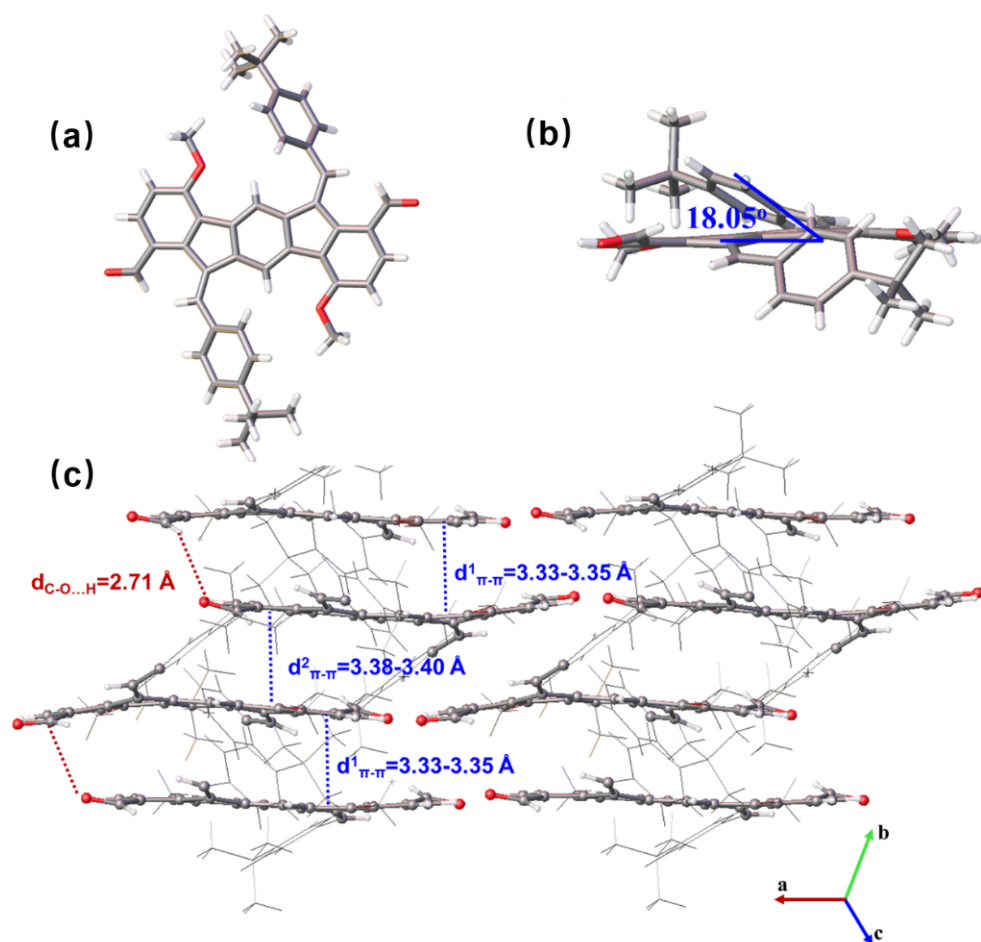

**Figure S7** X-ray single-crystal crystallographic analysis. Structure of (a) top view, (b) side view and (c) intermolecular packing mode and interaction of intermediate 7. Displacement ellipsoids are drawn at 50% probability level. The solvent molecule of  $\text{CHCl}_3$  was omitted for clarity.

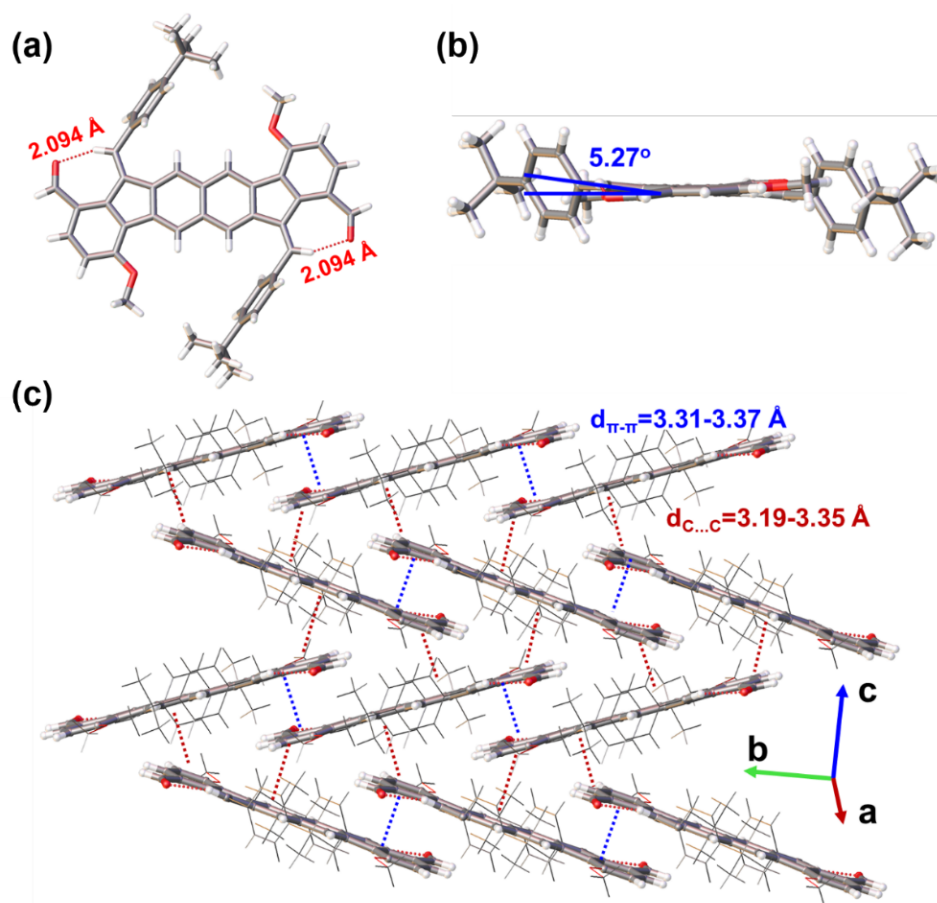

**Figure S8** X-ray single-crystal crystallographic analysis. Structure of (a) top view, (b) side view and (c) intermolecular packing mode and interaction of intermediate **13**. Displacement ellipsoids are drawn at 50% probability level.

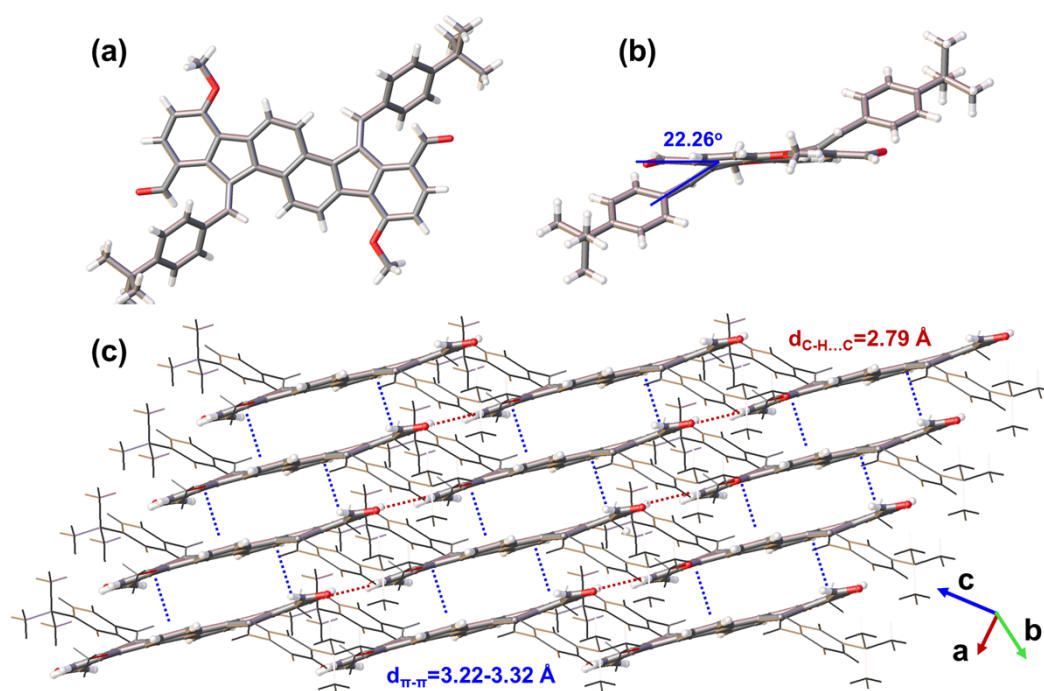

**Figure S9** X-ray single-crystal crystallographic analysis. Structure of (a) top view, (b) side view and (c) intermolecular packing mode and interaction of intermediate **19**. Displacement ellipsoids are drawn at 50% probability level.

**Table S1** Crystallographic data of compound **7**.

| Compound            | <b>7</b>              |
|---------------------|-----------------------|
| CCDC deposition NO. | 2478865               |
| Empirical formula   | $C_{94}H_{86}Cl_6O_8$ |
| Formula weight      | 1556.32               |
| Temperature/K       | 170 (1)               |
| Crystal system      | triclinic             |
| Space group         | P-1                   |
| a/Å                 | 14.54950(10)          |
| b/Å                 | 15.2378(2)            |
| c/Å                 | 19.4658(2)            |
| $\alpha/^\circ$     | 97.6160(10)           |
| $\beta/^\circ$      | 100.2140(10)          |

|                                               |                                                                |
|-----------------------------------------------|----------------------------------------------------------------|
| $\gamma/^\circ$                               | 108.7880(10)                                                   |
| Volume/ $\text{\AA}^3$                        | 3936.74(8)                                                     |
| Z                                             | 2                                                              |
| $\rho_{\text{calc}}/\text{g/cm}^3$            | 1.313                                                          |
| $\mu/\text{mm}^{-1}$                          | 2.458                                                          |
| F(000)                                        | 1632.0                                                         |
| Crystal size/ $\text{mm}^3$                   | $0.33 \times 0.23 \times 0.15$                                 |
| Radiation                                     | CuK $\alpha$ ( $\lambda = 1.54184$ )                           |
| $2\Theta$ range for data collection/ $^\circ$ | 4.712 to 151.864                                               |
| Index ranges                                  | $-18 \leq h \leq 16, -18 \leq k \leq 19, -24 \leq l \leq 23$   |
| Reflections collected                         | 56938                                                          |
| Independent reflections                       | 15942 [ $R_{\text{int}} = 0.0285, R_{\text{sigma}} = 0.0291$ ] |
| Data/restraints/parameters                    | 15942/0/989                                                    |
| Goodness-of-fit on $F^2$                      | 1.071                                                          |
| Final R indexes [ $I \geq 2\sigma(I)$ ]       | $R_1 = 0.0649, wR_2 = 0.1821$                                  |
| Final R indexes [all data]                    | $R_1 = 0.0739, wR_2 = 0.1906$                                  |
| Largest diff. peak/hole / $e \text{\AA}^{-3}$ | 1.50/-1.19                                                     |

**Table S2** Crystallographic data of compound **13**.

| Compound            | <b>13</b>                              |
|---------------------|----------------------------------------|
| CCDC deposition NO. | 2478866                                |
| Empirical formula   | $\text{C}_{25}\text{H}_{22}\text{O}_2$ |
| Formula weight      | 354.42                                 |
| Temperature/K       | 170.00 (10)                            |
| Crystal system      | monoclinic                             |
| Space group         | $P2_1/c$                               |
| $a/\text{\AA}$      | 16.3766(3)                             |
| $b/\text{\AA}$      | 10.38959(18)                           |
| $c/\text{\AA}$      | 11.4772(3)                             |
| $\alpha/^\circ$     | 90                                     |
| $\beta/^\circ$      | 103.825(10)                            |

|                                               |                                                               |
|-----------------------------------------------|---------------------------------------------------------------|
| $\gamma/^\circ$                               | 90                                                            |
| Volume/ $\text{\AA}^3$                        | 1896.22(7)                                                    |
| Z                                             | 4                                                             |
| $\rho_{\text{calc}}/\text{g/cm}^3$            | 1.241                                                         |
| $\mu/\text{mm}^{-1}$                          | 0.605                                                         |
| F(000)                                        | 752.0                                                         |
| Crystal size/ $\text{mm}^3$                   | $0.5 \times 0.3 \times 0.1$                                   |
| Radiation                                     | CuK $\alpha$ ( $\lambda = 1.54184$ )                          |
| $2\Theta$ range for data collection/ $^\circ$ | 5.558 to 155.072                                              |
| Index ranges                                  | $-20 \leq h \leq 19, -11 \leq k \leq 13, -14 \leq l \leq 14$  |
| Reflections collected                         | 14107                                                         |
| Independent reflections                       | 3878 [ $R_{\text{int}} = 0.0264, R_{\text{sigma}} = 0.0257$ ] |
| Data/restraints/parameters                    | 3878/0/248                                                    |
| Goodness-of-fit on $F^2$                      | 1.066                                                         |
| Final R indexes [ $I \geq 2\sigma(I)$ ]       | $R_1 = 0.0592, wR_2 = 0.1581$                                 |
| Final R indexes [all data]                    | $R_1 = 0.0667, wR_2 = 0.1637$                                 |
| Largest diff. peak/hole / $e \text{\AA}^{-3}$ | 0.71/-0.40                                                    |

**Table S3** Crystallographic data of compound **19**.

| Compound            | <b>19</b>                              |
|---------------------|----------------------------------------|
| CCDC deposition NO. | 2478867                                |
| Empirical formula   | $\text{C}_{25}\text{H}_{22}\text{O}_2$ |
| Formula weight      | 354.42                                 |
| Temperature/K       | 170.00 (3)                             |
| Crystal system      | triclinic                              |
| Space group         | P-1                                    |
| a/ $\text{\AA}$     | 5.6358(3)                              |
| b/ $\text{\AA}$     | 12.7956(6)                             |
| c/ $\text{\AA}$     | 12.9671(5)                             |
| $\alpha/^\circ$     | 97.392(4)                              |
| $\beta/^\circ$      | 93.846(4)                              |

|                                               |                                                               |
|-----------------------------------------------|---------------------------------------------------------------|
| $\gamma/^\circ$                               | 97.333(4)                                                     |
| Volume/ $\text{\AA}^3$                        | 916.43(8)                                                     |
| Z                                             | 2                                                             |
| $\rho_{\text{calc}}/\text{g}/\text{cm}^3$     | 1.284                                                         |
| $\mu/\text{mm}^{-1}$                          | 0.626                                                         |
| F(000)                                        | 376.0                                                         |
| Crystal size/ $\text{mm}^3$                   | $0.25 \times 0.15 \times 0.12$                                |
| Radiation                                     | CuK $\alpha$ ( $\lambda = 1.54184$ )                          |
| $2\Theta$ range for data collection/ $^\circ$ | 6.898 to 151.448                                              |
| Index ranges                                  | $-7 \leq h \leq 7, -15 \leq k \leq 15, -16 \leq l \leq 12$    |
| Reflections collected                         | 10280                                                         |
| Independent reflections                       | 3649 [ $R_{\text{int}} = 0.0338, R_{\text{sigma}} = 0.0420$ ] |
| Data/restraints/parameters                    | 3649/0/248                                                    |
| Goodness-of-fit on $F^2$                      | 1.089                                                         |
| Final R indexes [ $I \geq 2\sigma(I)$ ]       | $R_1 = 0.0762, wR_2 = 0.2130$                                 |
| Final R indexes [all data]                    | $R_1 = 0.0892, wR_2 = 0.2262$                                 |
| Largest diff. peak/hole / $e \text{\AA}^{-3}$ | 0.42/-0.23                                                    |

**Table S4** Crystallographic data of compound **1**.

| Compound            | <b>1</b>                             |
|---------------------|--------------------------------------|
| CCDC deposition NO. | 2478868                              |
| Empirical formula   | $\text{C}_{32}\text{H}_{30}\text{O}$ |
| Formula weight      | 430.56                               |
| Temperature/K       | 170.00 (10)                          |
| Crystal system      | triclinic                            |
| Space group         | P-1                                  |
| a/ $\text{\AA}$     | 9.8909(4)                            |
| b/ $\text{\AA}$     | 10.4826(5)                           |
| c/ $\text{\AA}$     | 13.2687(3)                           |
| $\alpha/^\circ$     | 108.996(3)                           |
| $\beta/^\circ$      | 97.316(3)                            |

|                                               |                                                               |
|-----------------------------------------------|---------------------------------------------------------------|
| $\gamma/^\circ$                               | 109.909(4)                                                    |
| Volume/ $\text{\AA}^3$                        | 1178.35(9)                                                    |
| Z                                             | 2                                                             |
| $\rho_{\text{calc}}/\text{g/cm}^3$            | 1.213                                                         |
| $\mu/\text{mm}^{-1}$                          | 0.543                                                         |
| F(000)                                        | 460.0                                                         |
| Crystal size/ $\text{mm}^3$                   | $0.1 \times 0.08 \times 0.03$                                 |
| Radiation                                     | CuK $\alpha$ ( $\lambda = 1.54184$ )                          |
| $2\Theta$ range for data collection/ $^\circ$ | 7.314 to 154.992                                              |
| Index ranges                                  | $-12 \leq h \leq 12, -12 \leq k \leq 13, -16 \leq l \leq 16$  |
| Reflections collected                         | 14522                                                         |
| Independent reflections                       | 4796 [ $R_{\text{int}} = 0.0460, R_{\text{sigma}} = 0.0462$ ] |
| Data/restraints/parameters                    | 4796/0/305                                                    |
| Goodness-of-fit on $F^2$                      | 1.052                                                         |
| Final R indexes [ $I \geq 2\sigma(I)$ ]       | $R_1 = 0.0700, wR_2 = 0.1989$                                 |
| Final R indexes [all data]                    | $R_1 = 0.0870, wR_2 = 0.2173$                                 |
| Largest diff. peak/hole / $e \text{\AA}^{-3}$ | 0.44/-0.24                                                    |

---

**Table S5** Crystallographic data of compound **2**.

| Compound                                    | <b>2</b>                                                        |
|---------------------------------------------|-----------------------------------------------------------------|
| CCDC deposition NO.                         | 2478869                                                         |
| Empirical formula                           | C <sub>72</sub> H <sub>66</sub> Cl <sub>12</sub> O <sub>2</sub> |
| Formula weight                              | 1388.64                                                         |
| Temperature/K                               | 100.00 (10)                                                     |
| Crystal system                              | monoclinic                                                      |
| Space group                                 | P2 <sub>1</sub> /n                                              |
| a/Å                                         | 15.5670(4)                                                      |
| b/Å                                         | 13.0056(2)                                                      |
| c/Å                                         | 18.0182(4)                                                      |
| α/°                                         | 90                                                              |
| β/°                                         | 113.360(3)                                                      |
| γ/°                                         | 90                                                              |
| Volume/Å <sup>3</sup>                       | 3348.92(14)                                                     |
| Z                                           | 2                                                               |
| ρ <sub>calc</sub> /cm <sup>3</sup>          | 1.377                                                           |
| μ/mm <sup>-1</sup>                          | 4.897                                                           |
| F(000)                                      | 1436.0                                                          |
| Crystal size/mm <sup>3</sup>                | 0.2 × 0.12 × 0.08                                               |
| Radiation                                   | CuKα (λ = 1.54184)                                              |
| 2θ range for data collection/°              | 6.372 to 155.974                                                |
| Index ranges                                | -19 ≤ h ≤ 19, -9 ≤ k ≤ 16, -22 ≤ l ≤ 22                         |
| Reflections collected                       | 23526                                                           |
| Independent reflections                     | 6916 [R <sub>int</sub> = 0.0440, R <sub>sigma</sub> = 0.0413]   |
| Data/restraints/parameters                  | 6916/0/395                                                      |
| Goodness-of-fit on F <sup>2</sup>           | 1.063                                                           |
| Final R indexes [I >= 2σ (I)]               | R <sub>1</sub> = 0.0592, wR <sub>2</sub> = 0.1578               |
| Final R indexes [all data]                  | R <sub>1</sub> = 0.0708, wR <sub>2</sub> = 0.1652               |
| Largest diff. peak/hole / e Å <sup>-3</sup> | 1.36/-0.85                                                      |

**Table S6** Crystallographic data of compound **3**.

| Compound                                    | <b>3</b>                                                       |
|---------------------------------------------|----------------------------------------------------------------|
| CCDC deposition NO.                         | 2478870                                                        |
| Empirical formula                           | C <sub>198</sub> H <sub>168</sub> O <sub>6</sub>               |
| Formula weight                              | 2643.31                                                        |
| Temperature/K                               | 169.97 (12)                                                    |
| Crystal system                              | triclinic                                                      |
| Space group                                 | P-1                                                            |
| a/Å                                         | 18.9545(5)                                                     |
| b/Å                                         | 20.8030(7)                                                     |
| c/Å                                         | 21.5827(6)                                                     |
| α/°                                         | 88.929(2)                                                      |
| β/°                                         | 65.138(3)                                                      |
| γ/°                                         | 80.456(3)                                                      |
| Volume/Å <sup>3</sup>                       | 7602.3(4)                                                      |
| Z                                           | 2                                                              |
| ρ <sub>calc</sub> /cm <sup>3</sup>          | 1.155                                                          |
| μ/mm <sup>-1</sup>                          | 0.519                                                          |
| F(000)                                      | 2808.0                                                         |
| Crystal size/mm <sup>3</sup>                | 0.2 × 0.14 × 0.005                                             |
| Radiation                                   | CuKα (λ = 1.54184)                                             |
| 2θ range for data collection/°              | 4.314 to 151.922                                               |
| Index ranges                                | -23 ≤ h ≤ 23, -25 ≤ k ≤ 26, -26 ≤ l ≤ 26                       |
| Reflections collected                       | 98493                                                          |
| Independent reflections                     | 30211 [R <sub>int</sub> = 0.1595, R <sub>sigma</sub> = 0.1264] |
| Data/restraints/parameters                  | 30211/0/1874                                                   |
| Goodness-of-fit on F <sup>2</sup>           | 0.963                                                          |
| Final R indexes [I ≥ 2σ (I)]                | R <sub>1</sub> = 0.0746, wR <sub>2</sub> = 0.1791              |
| Final R indexes [all data]                  | R <sub>1</sub> = 0.1599, wR <sub>2</sub> = 0.2221              |
| Largest diff. peak/hole / e Å <sup>-3</sup> | 0.40/-0.24                                                     |

## 5. Thermogravimetric analysis (TGA) analysis

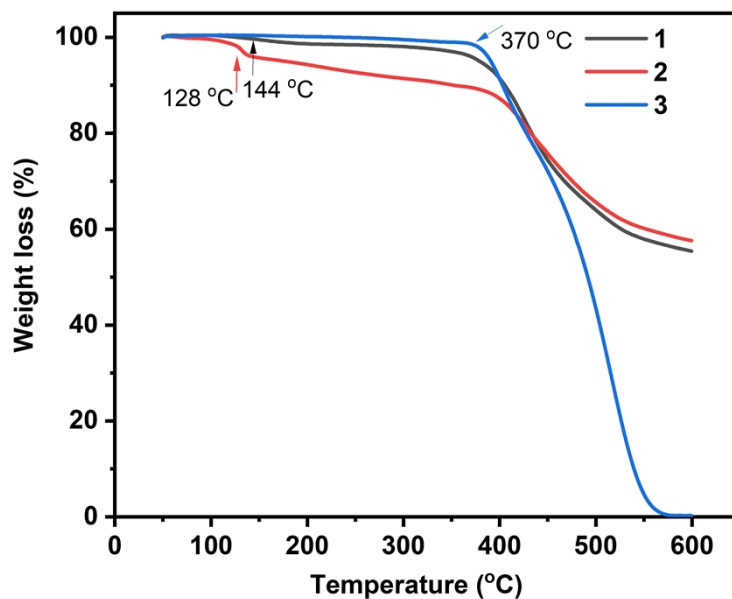

**Figure S10** TGA curves of 1, 2 and 3; heating rate: 10 °C/min from 50 °C to 600 °C under nitrogen atmosphere.

## 6. Infrared spectra analysis

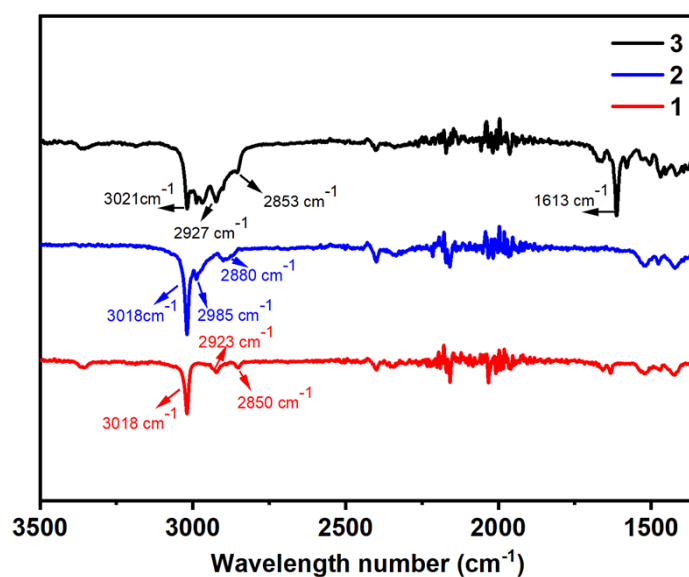

**Figure S11** The IR spectra of compounds 1-3

## 7. Calculations on electronic properties

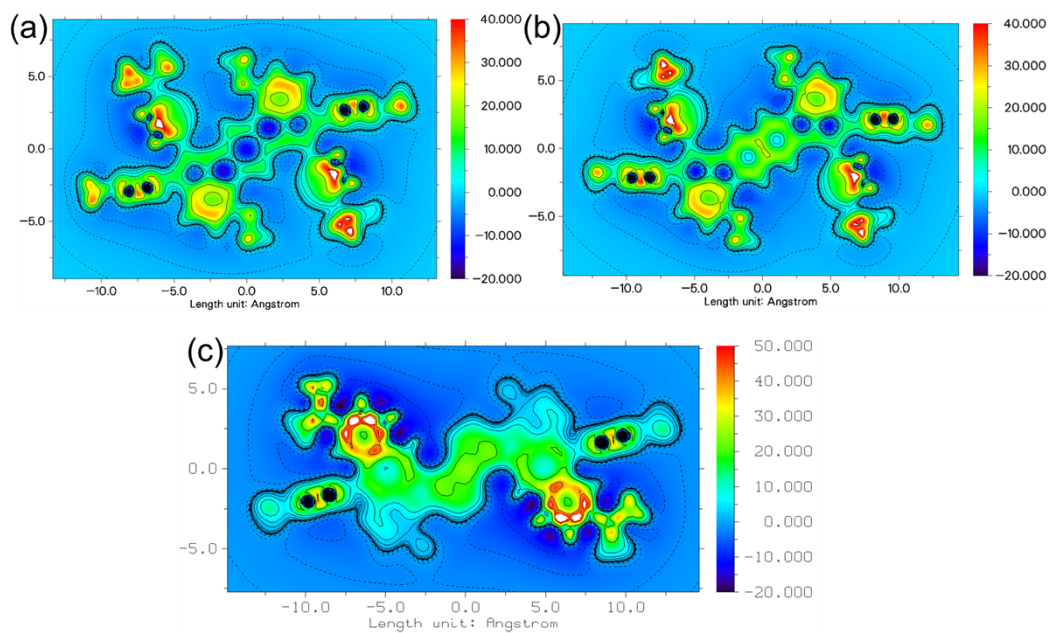

**Figure S12** Isotropic Chemical Shielding Surface at 1 Å of Z axis (ICSS(1)<sub>zz</sub>) for (a) 1, (b) 2 and (c) 3.

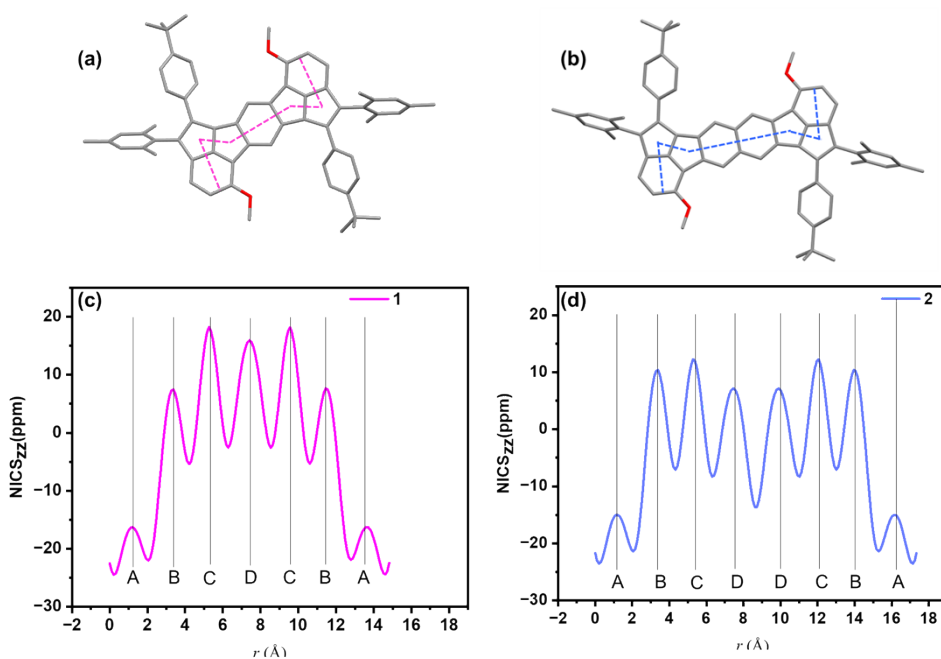

**Figure S13** The NICS-XY scan lines of two antiaromatic compounds of (a) 1 and (b) 2. The corresponding NICS values of (c) 1 and (d) 2 along the scan lines

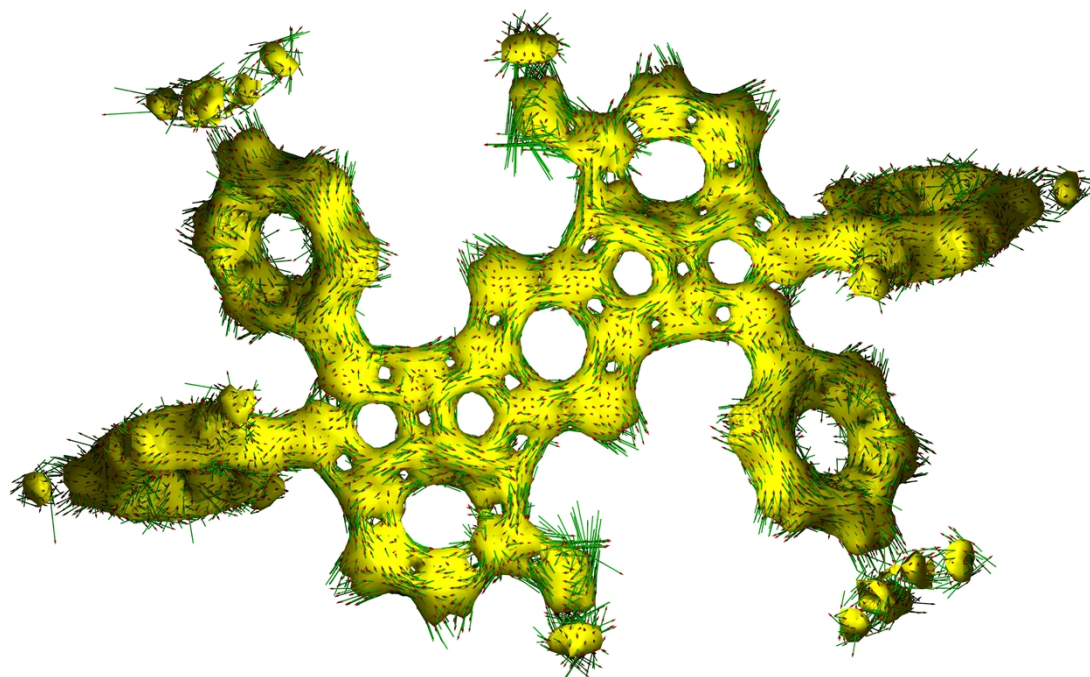

**Figure S14** The calculated ACID plots of compound **1** (closed-shell state)

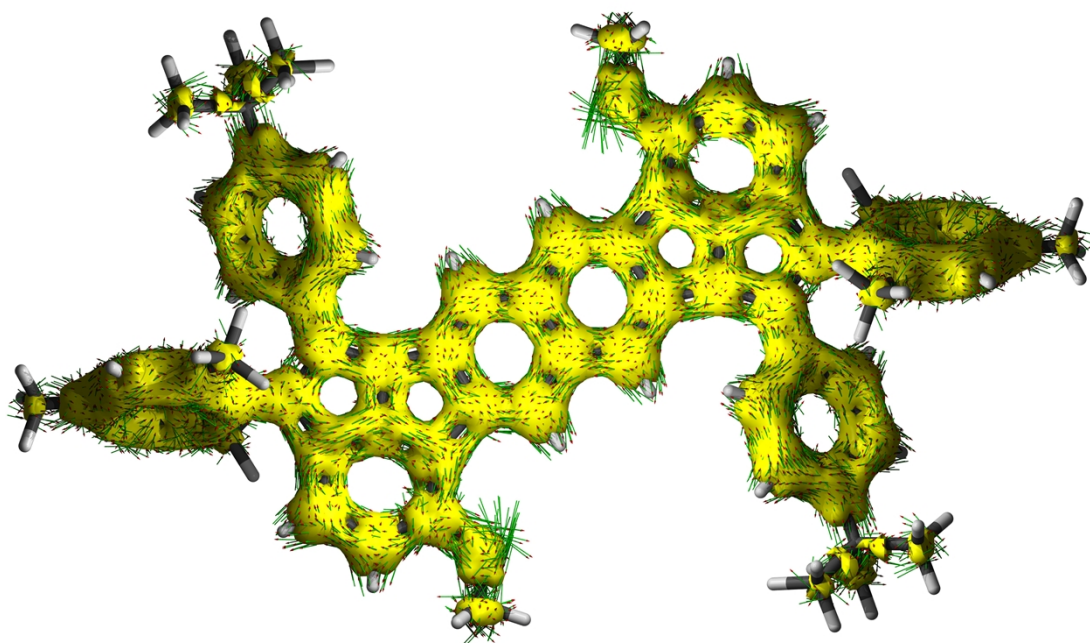

**Figure S15** The calculated ACID plots of compound **2** (open-shell state)

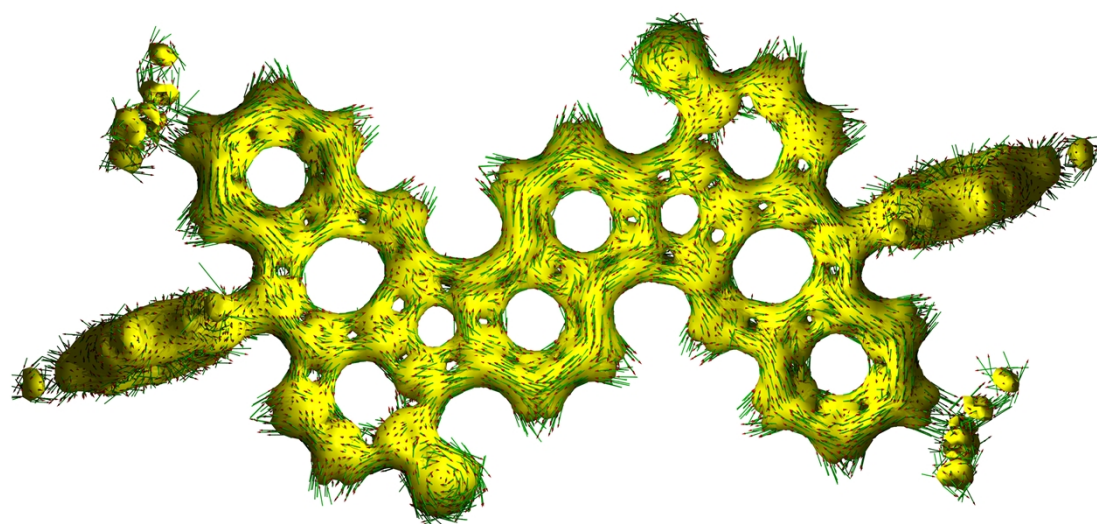

**Figure S16** The calculated ACID plots of compound **3** (closed-shell state)

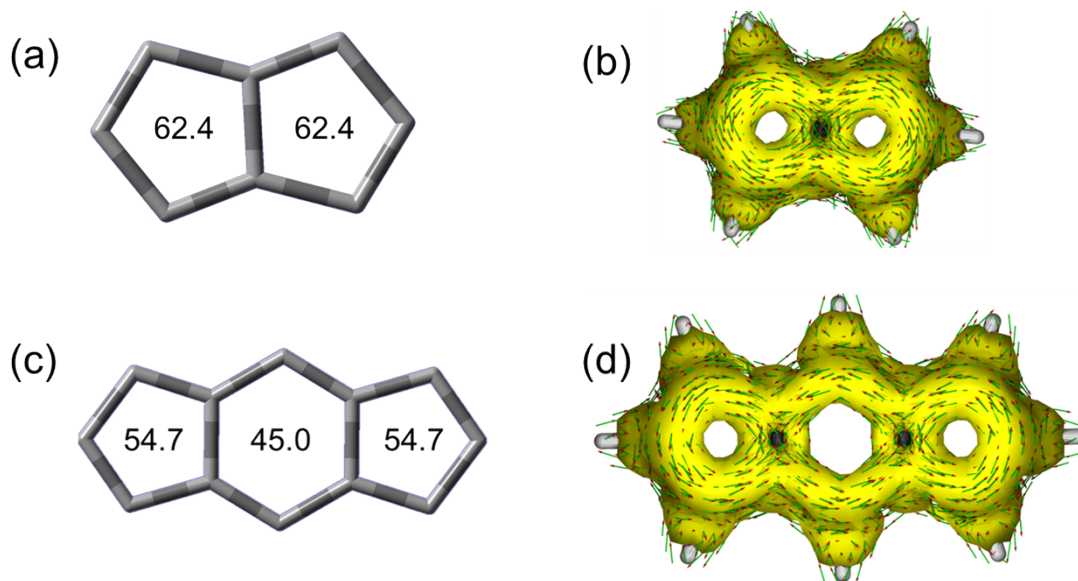

**Figure 17** The calculated NICS (a, c) and ACID plots (b, d) of pristine pentalene (a, b) and s-indacene (c, d) units.

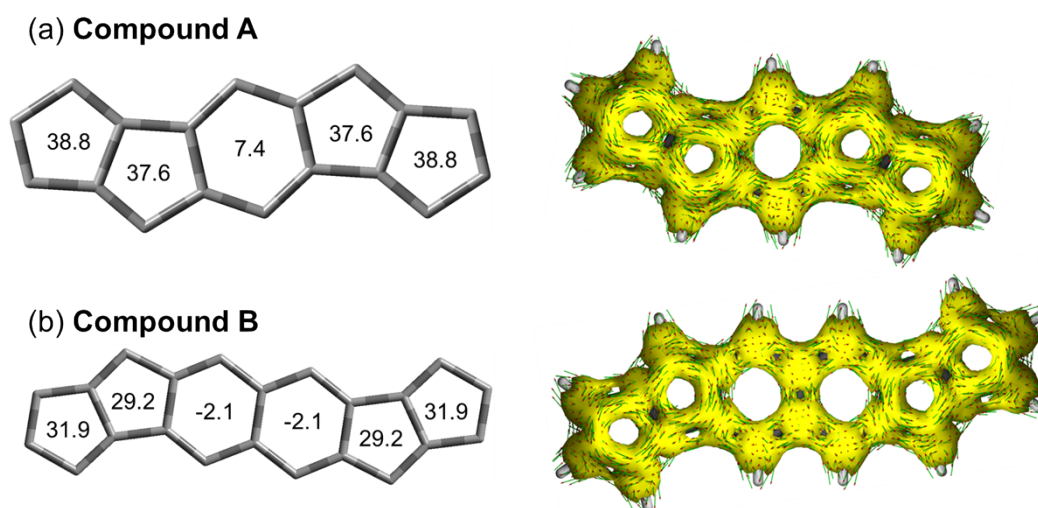

**Figure S18** The model compounds of (a) bis(pentalene)-fused benzene or (b) naphthalene derivatives.

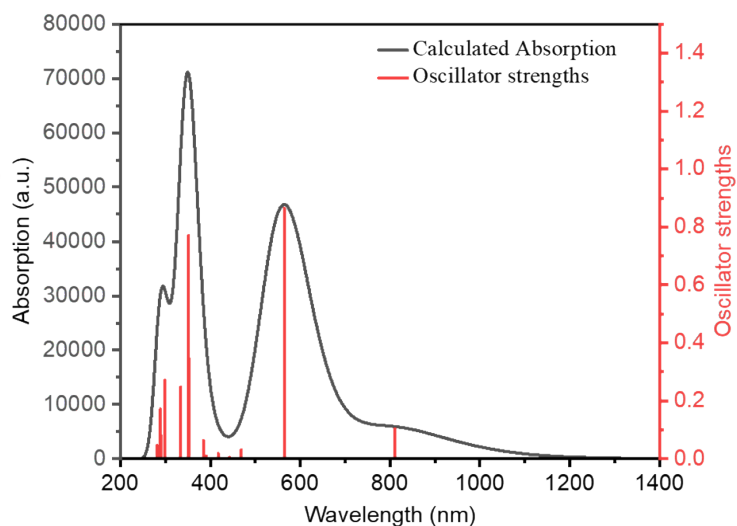

**Figure S19** Calculated UV-vis absorption spectra of the **1** (closed-shell single state) based on TD-B3LYP-D3(BJ)/6-31G(d,p) level of theory

**Table S7** Excitation energies, oscillator strengths and orbital contribution of the  $S_0 \rightarrow S_n$  excitations of **1** calculated at the TD-B3LYP-D3(BJ)/6-31G(d,p) level of theory.

| transition            | energy [eV] | energy [nm] | oscillator strength | orbital contribution |       |
|-----------------------|-------------|-------------|---------------------|----------------------|-------|
| $S_0 \rightarrow S_1$ | 1.4772      | 839.32      | 0.00010             | H-1 $\rightarrow$ L  | 95.9% |
| $S_0 \rightarrow S_2$ | 1.5298      | 810.46      | 0.10370             | H $\rightarrow$ L    | 74.2% |
|                       |             |             |                     | H-3 $\rightarrow$ L  | 25.3% |
| $S_0 \rightarrow S_3$ | 1.6801      | 737.96      | 0.00000             | H-2 $\rightarrow$ L  | 96.0% |
| $S_0 \rightarrow S_4$ | 2.1946      | 564.95      | 0.86380             | H-3 $\rightarrow$ L  | 70.8% |
|                       |             |             |                     | H $\rightarrow$ L    | 23.4% |
| $S_0 \rightarrow S_5$ | 2.6274      | 471.89      | 0.00010             | H-4 $\rightarrow$ L  | 97.9% |
| $S_0 \rightarrow S_6$ | 2.6429      | 469.12      | 0.03100             | H-5 $\rightarrow$ L  | 96.1% |
| $S_0 \rightarrow S_7$ | 2.8008      | 442.67      | 0.00510             | H-6 $\rightarrow$ L  | 98.0% |
| $S_0 \rightarrow S_8$ | 2.8057      | 441.90      | 0.00150             | H-7 $\rightarrow$ L  | 98.4% |

|                          |        |        |         |                     |       |
|--------------------------|--------|--------|---------|---------------------|-------|
| $S_0 \rightarrow S_9$    | 2.9678 | 417.76 | 0.01880 | H-8 $\rightarrow$ L | 92.5% |
| $S_0 \rightarrow S_{10}$ | 2.9818 | 415.80 | 0.00260 | H-9 $\rightarrow$ L | 87.6% |
|                          |        |        |         | H $\rightarrow$ L+1 | 7.1%  |

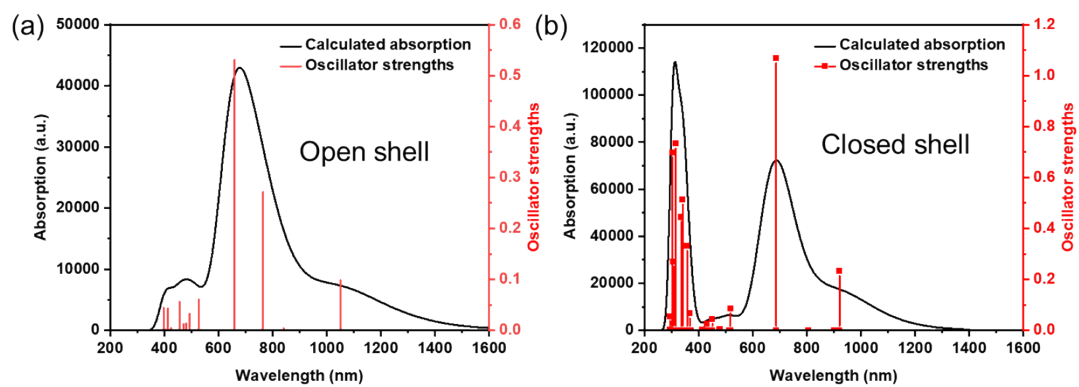

**Figure S20** Calculated UV-vis absorption spectra of the compound **2** in (a) open-shell and (b) closed-shell states based on TD-(U)B3LYP-D3(BJ)/6-31G(d,p) level of theory.

**Table S8** Excitation energies, oscillator strengths and orbital contribution of the  $S_0 \rightarrow S_n$  excitations of **2** calculated at the TD-UB3LYP-D3(BJ)/6-31G(d,p) level of theory.

| transition               | energy [eV] | energy [nm] | oscillator strength | orbital contribution  |       |
|--------------------------|-------------|-------------|---------------------|-----------------------|-------|
| $S_0 \rightarrow S_1$    | 1.9697      | 629.46      | 0.01680             | H $\rightarrow$ L     | 71.4% |
|                          |             |             |                     | H $\rightarrow$ L+2   | 20.9% |
| $S_0 \rightarrow S_2$    | 2.1561      | 575.04      | 0.00480             | H $\rightarrow$ L+1   | 79.6% |
|                          |             |             |                     | H $\rightarrow$ L+3   | 8.5%  |
| $S_0 \rightarrow S_3$    | 2.1946      | 564.95      | 0.15430             | H $\rightarrow$ L+2   | 68.8% |
|                          |             |             |                     | H $\rightarrow$ L     | 20.8% |
| $S_0 \rightarrow S_4$    | 2.4113      | 514.18      | 0.00010             | H $\rightarrow$ L+3   | 80.8% |
|                          |             |             |                     | H $\rightarrow$ L+1   | 8.9%  |
| $S_0 \rightarrow S_5$    | 2.5209      | 491.83      | 0.45790             | H-1 $\rightarrow$ L   | 94.6% |
| $S_0 \rightarrow S_6$    | 2.6278      | 471.82      | 0.00630             | H-1 $\rightarrow$ L+1 | 79.0% |
|                          |             |             |                     | H-3 $\rightarrow$ L   | 47.0% |
|                          |             |             |                     | H-4 $\rightarrow$ L+1 | 22.9% |
|                          |             |             |                     | H-3 $\rightarrow$ L+2 | 10.3% |
| $S_0 \rightarrow S_7$    | 2.6573      | 466.58      | 0.01670             | H-3 $\rightarrow$ L+1 | 6.9%  |
|                          |             |             |                     | H-4 $\rightarrow$ L   | 33.5% |
|                          |             |             |                     | H-3 $\rightarrow$ L+1 | 26.2% |
|                          |             |             |                     | H-4 $\rightarrow$ L+1 | 22.7% |
| $S_0 \rightarrow S_8$    | 2.6674      | 464.81      | 0.00030             | H-1 $\rightarrow$ L+1 | 9.2%  |
|                          |             |             |                     | H-1 $\rightarrow$ L+2 | 84.1% |
|                          |             |             |                     | H-2 $\rightarrow$ L+1 | 5.1%  |
| $S_0 \rightarrow S_9$    | 2.7240      | 455.15      | 0.43700             | H-2 $\rightarrow$ L   | 75.4% |
|                          |             |             |                     | H-2 $\rightarrow$ L+2 | 10.6% |
| $S_0 \rightarrow S_{10}$ | 2.8298      | 438.14      | 0.00400             |                       |       |

**Table S9** Excitation energies, oscillator strengths and orbital contribution of the  $S_0 \rightarrow S_n$  excitations of **2** calculated at the TD-B3LYP-D3(BJ)/6-31G(d,p) level of theory.

| transition               | energy [eV] | energy [nm] | oscillator strength | orbital contribution |       |
|--------------------------|-------------|-------------|---------------------|----------------------|-------|
| $S_0 \rightarrow S_1$    | 1.3470      | 920.45      | 0.23230             | H $\rightarrow$ L    | 52.6% |
|                          |             |             |                     | H-2 $\rightarrow$ L  | 48.1% |
| $S_0 \rightarrow S_2$    | 1.3761      | 900.98      | 0.00000             | H-1 $\rightarrow$ L  | 99.0% |
| $S_0 \rightarrow S_3$    | 1.5398      | 805.20      | 0.00000             | H-3 $\rightarrow$ L  | 98.9% |
| $S_0 \rightarrow S_4$    | 1.8073      | 686.02      | 1.06690             | H-2 $\rightarrow$ L  | 50.4% |
|                          |             |             |                     | H $\rightarrow$ L    | 48.4% |
| $S_0 \rightarrow S_5$    | 2.3960      | 517.46      | 0.08580             | H-5 $\rightarrow$ L  | 98.2% |
| $S_0 \rightarrow S_6$    | 2.4191      | 512.52      | 0.00000             | H-4 $\rightarrow$ L  | 96.9% |
| $S_0 \rightarrow S_7$    | 2.5909      | 478.54      | 0.00360             | H-6 $\rightarrow$ L  | 99.2% |
| $S_0 \rightarrow S_8$    | 2.5965      | 477.51      | 0.00110             | H-7 $\rightarrow$ L  | 99.3% |
| $S_0 \rightarrow S_9$    | 2.7511      | 450.67      | 0.04360             | H-8 $\rightarrow$ L  | 94.9% |
| $S_0 \rightarrow S_{10}$ | 2.7719      | 447.29      | 0.00000             | H-9 $\rightarrow$ L  | 86.4% |
|                          |             |             |                     | H $\rightarrow$ L+1  | 9.1%  |

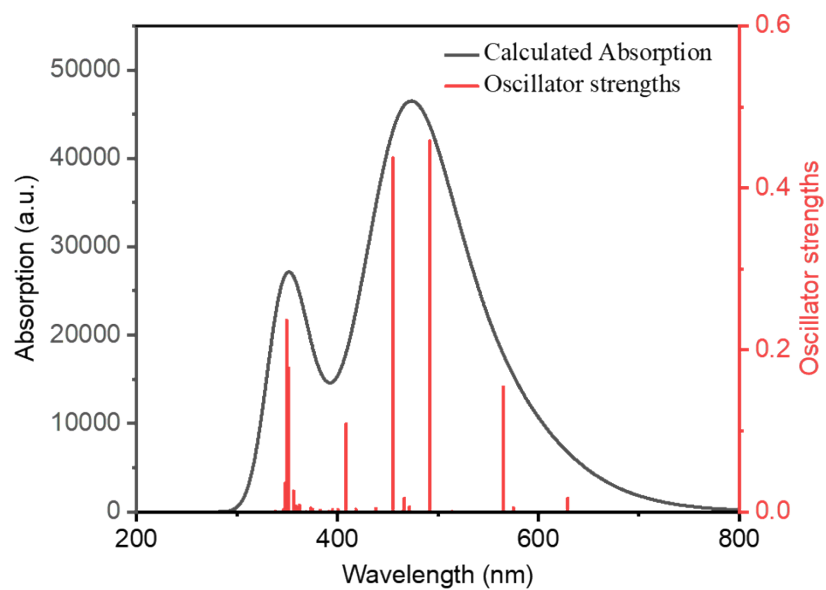

**Figure S21** Calculated UV-vis absorption spectra of the **3** (closed-shell single state) based on TD-B3LYP-D3(BJ)/6-31G(d,p) level of theory

**Table S10** Excitation energies, oscillator strengths and orbital contribution of the  $S_0 \rightarrow S_n$  excitations of **3** calculated at the TD-B3LYP-D3(BJ)/6-31G(d,p) level of theory.

| transition            | energy [eV] | energy [nm] | oscillator strength | orbital contribution  |       |
|-----------------------|-------------|-------------|---------------------|-----------------------|-------|
| $S_0 \rightarrow S_1$ | 1.9697      | 629.46      | 0.01680             | H $\rightarrow$ L     | 71.4% |
|                       |             |             |                     | H $\rightarrow$ L+2   | 20.9% |
| $S_0 \rightarrow S_2$ | 2.1561      | 575.04      | 0.00480             | H $\rightarrow$ L+1   | 79.6% |
|                       |             |             |                     | H $\rightarrow$ L+3   | 8.5%  |
| $S_0 \rightarrow S_3$ | 2.1946      | 564.95      | 0.15430             | H $\rightarrow$ L+2   | 68.8% |
|                       |             |             |                     | H $\rightarrow$ L     | 20.8% |
| $S_0 \rightarrow S_4$ | 2.4113      | 514.18      | 0.00010             | H $\rightarrow$ L+3   | 80.8% |
|                       |             |             |                     | H $\rightarrow$ L+1   | 8.9%  |
| $S_0 \rightarrow S_5$ | 2.5209      | 491.83      | 0.45790             | H-1 $\rightarrow$ L   | 94.6% |
| $S_0 \rightarrow S_6$ | 2.6278      | 471.82      | 0.00630             | H-1 $\rightarrow$ L+1 | 79.0% |
|                       |             |             |                     | H-3 $\rightarrow$ L   | 47.0% |
|                       |             |             |                     | H-4 $\rightarrow$ L+1 | 22.9% |
|                       |             |             |                     | H-3 $\rightarrow$ L+2 | 10.3% |
| $S_0 \rightarrow S_7$ | 2.6573      | 466.58      | 0.01670             | H-3 $\rightarrow$ L+1 | 6.9%  |
|                       |             |             |                     | H-4 $\rightarrow$ L   | 33.5% |
|                       |             |             |                     | H-3 $\rightarrow$ L+1 | 26.2% |
|                       |             |             |                     | H-4 $\rightarrow$ L+1 | 22.7% |
| $S_0 \rightarrow S_8$ | 2.6674      | 464.81      | 0.00030             | H-1 $\rightarrow$ L+1 | 9.2%  |
|                       |             |             |                     | H-1 $\rightarrow$ L+2 | 84.1% |
|                       |             |             |                     | H-2 $\rightarrow$ L+1 | 5.1%  |
| $S_0 \rightarrow S_9$ | 2.7240      | 455.15      | 0.43700             | H-2 $\rightarrow$ L   | 75.4% |
|                       |             |             |                     | H-2 $\rightarrow$ L+2 | 10.6% |

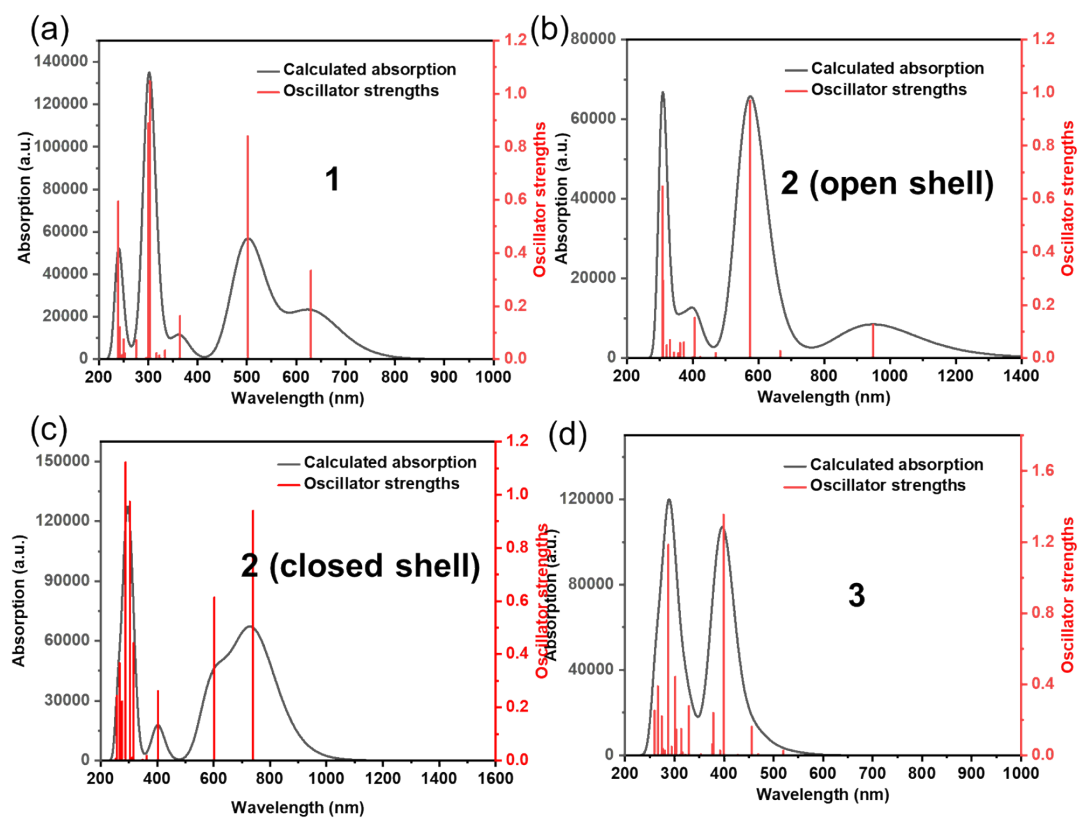

**Figure S22** Calculated UV-vis absorption spectra of the (a) **1** with closed shell, (b) **2** with open shell, (c) **2** with closed shell and **3** with closed shell based on (U)M06-2X/6-311G(d,p) level of theory.

**Table S11** Excitation energies, oscillator strengths and orbital contribution of the  $S_0 \rightarrow S_n$  excitations of **1** calculated at the M06-2X/6-311G(d,p) level of theory.

| transition               | energy [eV] | energy [nm] | oscillator strength | orbital contribution  |       |
|--------------------------|-------------|-------------|---------------------|-----------------------|-------|
| $S_0 \rightarrow S_1$    | 1.8637      | 665.26      | 0.00000             | H-1 $\rightarrow$ L   | 68.9% |
|                          |             |             |                     | H-3 $\rightarrow$ L   | 29.1% |
| $S_0 \rightarrow S_2$    | 1.9678      | 630.07      | 0.33420             | H $\rightarrow$ L     | 81.5% |
|                          |             |             |                     | H-2 $\rightarrow$ L   | 14.8% |
| $S_0 \rightarrow S_3$    | 2.1220      | 584.28      | 0.00020             | H-3 $\rightarrow$ L   | 66.4% |
|                          |             |             |                     | H-1 $\rightarrow$ L   | 28.1% |
| $S_0 \rightarrow S_4$    | 2.4694      | 502.08      | 0.83930             | H-2 $\rightarrow$ L   | 79.6% |
|                          |             |             |                     | H $\rightarrow$ L     | 14.5% |
| $S_0 \rightarrow S_5$    | 3.4061      | 364.01      | 0.16300             | H-5 $\rightarrow$ L   | 72.8% |
|                          |             |             |                     | H-12 $\rightarrow$ L  | 9.4%  |
|                          |             |             |                     | H-8 $\rightarrow$ L   | 6.0%  |
| $S_0 \rightarrow S_6$    | 3.4499      | 359.38      | 0.00020             | H-4 $\rightarrow$ L   | 91.7% |
| $S_0 \rightarrow S_7$    | 3.6610      | 338.66      | 0.00040             | H $\rightarrow$ L+1   | 86.1% |
|                          |             |             |                     | H-8 $\rightarrow$ L   | 36.2% |
|                          |             |             |                     | H-5 $\rightarrow$ L   | 18.2% |
| $S_0 \rightarrow S_8$    | 3.7122      | 333.99      | 0.03300             | H-12 $\rightarrow$ L  | 15.3% |
|                          |             |             |                     | H-6 $\rightarrow$ L   | 11.0% |
|                          |             |             |                     | H-3 $\rightarrow$ L+1 | 6.7%  |
| $S_0 \rightarrow S_9$    | 3.8237      | 324.25      | 0.00340             | H-7 $\rightarrow$ L   | 73.6% |
|                          |             |             |                     | H-9 $\rightarrow$ L   | 13.2% |
| $S_0 \rightarrow S_{10}$ | 3.8426      | 322.66      | 0.01370             | H-6 $\rightarrow$ L   | 77.4% |
|                          |             |             |                     | H-12 $\rightarrow$ L  | 5.5%  |

**Table S12** Excitation energies, oscillator strengths and orbital contribution of the  $S_0 \rightarrow S_n$  excitations of **2** calculated at the UM06-2X/6-311G(d,p) level of theory.

| transition            | energy [eV] | energy [nm] | oscillator strength | orbital contribution                            |       |
|-----------------------|-------------|-------------|---------------------|-------------------------------------------------|-------|
| $S_0 \rightarrow S_1$ | 1.2439      | 996.74      | 0.00000             | $\alpha\text{-H} \rightarrow \alpha\text{-L}$   | 28.3% |
|                       |             |             |                     | $\beta\text{-L} \rightarrow \beta\text{-L}$     | 28.3% |
|                       |             |             |                     | $\alpha\text{-H-1} \rightarrow \alpha\text{-L}$ | 11.4% |
|                       |             |             |                     | $\beta\text{-H-1} \rightarrow \beta\text{-L}$   | 11.4% |
|                       |             |             |                     | $\alpha\text{-H-2} \rightarrow \alpha\text{-L}$ | 5.1%  |
|                       |             |             |                     | $\beta\text{-H-2} \rightarrow \beta\text{-L}$   | 5.1%  |
|                       |             |             |                     | $\beta\text{-H-1} \rightarrow \beta\text{-L}$   | 20.1% |
|                       |             |             |                     | $\alpha\text{-H-1} \rightarrow \alpha\text{-L}$ | 20.1% |
|                       |             |             |                     | $\beta\text{-H} \rightarrow \beta\text{-L}$     | 12.4% |
|                       |             |             |                     | $\alpha\text{-H} \rightarrow \alpha\text{-L}$   | 12.4% |
| $S_0 \rightarrow S_2$ | 1.3065      | 948.98      | 0.12550             | $\beta\text{-H-2} \rightarrow \beta\text{-L}$   | 8.0%  |
|                       |             |             |                     | $\alpha\text{-H-2} \rightarrow \alpha\text{-L}$ | 8.0%  |
|                       |             |             |                     | $\beta\text{-H-3} \rightarrow \beta\text{-L}$   | 5.3%  |
|                       |             |             |                     | $\alpha\text{-H-3} \rightarrow \alpha\text{-L}$ | 5.3%  |
|                       |             |             |                     | $\beta\text{-H} \rightarrow \beta\text{-L}$     | 14.1% |
|                       |             |             |                     | $\alpha\text{-H} \rightarrow \alpha\text{-L}$   | 14.1% |
|                       |             |             |                     | $\beta\text{-H-3} \rightarrow \beta\text{-L}$   | 13.7% |
|                       |             |             |                     | $\alpha\text{-H-3} \rightarrow \alpha\text{-L}$ | 13.7% |
|                       |             |             |                     | $\alpha\text{-H-2} \rightarrow \alpha\text{-L}$ | 11.4% |
|                       |             |             |                     | $\beta\text{-H-2} \rightarrow \beta\text{-L}$   | 11.4% |
| $S_0 \rightarrow S_3$ | 1.7102      | 724.97      | 0.00000             | $\beta\text{-H-3} \rightarrow \beta\text{-L}$   | 37.5% |
|                       |             |             |                     | $\alpha\text{-H-3} \rightarrow \alpha\text{-L}$ | 37.5% |
|                       |             |             |                     | $\beta\text{-H-3} \rightarrow \beta\text{-L}$   | 27.2% |
|                       |             |             |                     | $\alpha\text{-H-3} \rightarrow \alpha\text{-L}$ | 27.2% |
| $S_0 \rightarrow S_4$ | 1.8611      | 666.19      | 0.02690             | $\beta\text{-H-2} \rightarrow \beta\text{-L}$   | 8.8%  |
|                       |             |             |                     | $\alpha\text{-H-2} \rightarrow \alpha\text{-L}$ | 8.8%  |
|                       |             |             |                     | $\beta\text{-H-1} \rightarrow \beta\text{-L}$   | 5.5%  |
|                       |             |             |                     | $\alpha\text{-H-1} \rightarrow \alpha\text{-L}$ | 5.5%  |
|                       |             |             |                     | $\beta\text{-H} \rightarrow \beta\text{-L}$     | 29.9% |
|                       |             |             |                     | $\alpha\text{-H} \rightarrow \alpha\text{-L}$   | 29.9% |
| $S_0 \rightarrow S_5$ | 1.9744      | 627.96      | 0.00000             | $\alpha\text{-H-2} \rightarrow \alpha\text{-L}$ | 8.3%  |
|                       |             |             |                     | $\beta\text{-H-2} \rightarrow \beta\text{-L}$   | 8.3%  |
|                       |             |             |                     | $\beta\text{-H-2} \rightarrow \beta\text{-L}$   | 14.2% |
|                       |             |             |                     | $\alpha\text{-H-2} \rightarrow \alpha\text{-L}$ | 14.2% |
| $S_0 \rightarrow S_6$ | 2.1565      | 574.93      | 0.96950             | $\beta\text{-H-1} \rightarrow \beta\text{-L}$   | 9.5%  |
|                       |             |             |                     | $\alpha\text{-H-1} \rightarrow \alpha\text{-L}$ | 9.5%  |
|                       |             |             |                     | $\alpha\text{-H} \rightarrow \alpha\text{-L+1}$ | 5.1%  |

|                          |        |        |         |                                                   |       |
|--------------------------|--------|--------|---------|---------------------------------------------------|-------|
|                          |        |        |         | $\beta\text{-H} \rightarrow \beta\text{-L}+1$     | 5.1%  |
|                          |        |        |         | $\beta\text{-H-1} \rightarrow \beta\text{-L}$     | 22.1% |
|                          |        |        |         | $\alpha\text{-H-1} \rightarrow \alpha\text{-L}$   | 22.1% |
| $S_0 \rightarrow S_8$    | 2.7134 | 456.93 | 0.00000 | $\alpha\text{-H-2} \rightarrow \alpha\text{-L}$   | 13.8% |
|                          |        |        |         | $\beta\text{-H-2} \rightarrow \beta\text{-L}$     | 13.8% |
|                          |        |        |         | $\alpha\text{-H-1} \rightarrow \alpha\text{-L}+1$ | 5.5%  |
|                          |        |        |         | $\beta\text{-H-1} \rightarrow \beta\text{-L}+1$   | 5.5%  |
|                          |        |        |         | $\beta\text{-H-4} \rightarrow \beta\text{-L}$     | 29.6% |
| $S_0 \rightarrow S_9$    | 2.9308 | 423.04 | 0.00410 | $\alpha\text{-H-4} \rightarrow \alpha\text{-L}$   | 29.6% |
|                          |        |        |         | $\beta\text{-H-2} \rightarrow \beta\text{-L}$     | 7.1%  |
|                          |        |        |         | $\alpha\text{-H-2} \rightarrow \alpha\text{-L}$   | 7.1%  |
| $S_0 \rightarrow S_{10}$ | 2.9478 | 420.60 | 0.00000 | $\alpha\text{-H-4} \rightarrow \alpha\text{-L}$   | 39.4% |
|                          |        |        |         | $\beta\text{-H-4} \rightarrow \beta\text{-L}$     | 39.4% |

---

**Table S13** Excitation energies, oscillator strengths and orbital contribution of the  $S_0 \rightarrow S_n$  excitations of **2** calculated at the M06-2X/6-311G(d,p) level of theory.

| transition               | energy [eV] | energy [nm] | oscillator strength | orbital contribution |       |
|--------------------------|-------------|-------------|---------------------|----------------------|-------|
| $S_0 \rightarrow S_1$    | 1.6757      | 739.89      | 0.94060             | H $\rightarrow$ L    | 83.8% |
|                          |             |             |                     | H-2 $\rightarrow$ L  | 14.1% |
| $S_0 \rightarrow S_2$    | 1.7949      | 690.76      | 0.00000             | H-3 $\rightarrow$ L  | 53.7% |
|                          |             |             |                     | H-1 $\rightarrow$ L  | 44.2% |
| $S_0 \rightarrow S_3$    | 1.8729      | 661.99      | 0.00000             | H-1 $\rightarrow$ L  | 52.1% |
|                          |             |             |                     | H-3 $\rightarrow$ L  | 42.9% |
| $S_0 \rightarrow S_4$    | 2.0580      | 602.45      | 0.61380             | H-2 $\rightarrow$ L  | 81.6% |
|                          |             |             |                     | H $\rightarrow$ L    | 14.3% |
| $S_0 \rightarrow S_5$    | 3.0774      | 402.89      | 0.26120             | H-5 $\rightarrow$ L  | 71.9% |
|                          |             |             |                     | H-8 $\rightarrow$ L  | 14.7% |
|                          |             |             |                     | H-10 $\rightarrow$ L | 5.4%  |
| $S_0 \rightarrow S_6$    | 3.1351      | 395.47      | 0.00000             | H-4 $\rightarrow$ L  | 85.7% |
| $S_0 \rightarrow S_7$    | 3.3081      | 374.79      | 0.00010             | H $\rightarrow$ L+1  | 74.9% |
|                          |             |             |                     | H $\rightarrow$ L+2  | 17.1% |
| $S_0 \rightarrow S_8$    | 3.4112      | 363.46      | 0.01770             | H-8 $\rightarrow$ L  | 49.9% |
|                          |             |             |                     | H-5 $\rightarrow$ L  | 21.7% |
|                          |             |             |                     | H-6 $\rightarrow$ L  | 11.0% |
|                          |             |             |                     | H-10 $\rightarrow$ L | 9.6%  |
|                          |             |             |                     | H-9 $\rightarrow$ L  | 59.7% |
| $S_0 \rightarrow S_9$    | 3.4694      | 357.36      | 0.00000             | H-11 $\rightarrow$ L | 12.6% |
|                          |             |             |                     | H $\rightarrow$ L+2  | 12.6% |
|                          |             |             |                     | H-4 $\rightarrow$ L  | 6.5%  |
| $S_0 \rightarrow S_{10}$ | 3.5608      | 348.19      | 0.00260             | H-7 $\rightarrow$ L  | 89.8% |
|                          |             |             |                     | H-11 $\rightarrow$ L | 5.4%  |

**Table S14** Excitation energies, oscillator strengths and orbital contribution of the  $S_0 \rightarrow S_n$  excitations of **3** calculated at the M06-2X/6-311G(d,p) level of theory.

| transition            | energy [eV] | energy [nm] | oscillator strength | orbital contribution   |       |
|-----------------------|-------------|-------------|---------------------|------------------------|-------|
| $S_0 \rightarrow S_1$ | 2.3855      | 519.74      | 0.02520             | H $\rightarrow$ L      | 49.1% |
|                       |             |             |                     | H $\rightarrow$ L+2    | 27.3% |
|                       |             |             |                     | H $\rightarrow$ L+1    | 10.6% |
|                       |             |             |                     | H-2 $\rightarrow$ L+3  | 6.7%  |
| $S_0 \rightarrow S_2$ | 2.6444      | 468.86      | 0.00600             | H $\rightarrow$ L+3    | 29.1% |
|                       |             |             |                     | H $\rightarrow$ L+2    | 23.5% |
|                       |             |             |                     | H $\rightarrow$ L+1    | 20.2% |
| $S_0 \rightarrow S_3$ | 2.7179      | 456.18      | 0.15980             | H-2 $\rightarrow$ L    | 14.2% |
|                       |             |             |                     | H $\rightarrow$ L      | 26.7% |
|                       |             |             |                     | H $\rightarrow$ L+1    | 25.4% |
| $S_0 \rightarrow S_4$ | 2.9013      | 427.34      | 0.00310             | H $\rightarrow$ L+1    | 25.4% |
|                       |             |             |                     | H $\rightarrow$ L+2    | 20.8% |
|                       |             |             |                     | H-1 $\rightarrow$ L    | 7.7%  |
| $S_0 \rightarrow S_5$ | 3.1056      | 399.23      | 1.35390             | H $\rightarrow$ L+3    | 42.3% |
|                       |             |             |                     | H $\rightarrow$ L+1    | 21.5% |
|                       |             |             |                     | H $\rightarrow$ L+2    | 9.1%  |
| $S_0 \rightarrow S_6$ | 3.1596      | 392.40      | 0.01210             | H-2 $\rightarrow$ L+2  | 6.7%  |
|                       |             |             |                     | H-1 $\rightarrow$ L    | 64.7% |
|                       |             |             |                     | H $\rightarrow$ L      | 7.9%  |
| $S_0 \rightarrow S_5$ | 3.1056      | 399.23      | 1.35390             | H-1 $\rightarrow$ L+2  | 6.7%  |
|                       |             |             |                     | H $\rightarrow$ L+2    | 5.8%  |
|                       |             |             |                     | H-12 $\rightarrow$ L+1 | 26.0% |
| $S_0 \rightarrow S_6$ | 3.1596      | 392.40      | 0.01210             | H-12 $\rightarrow$ L   | 13.6% |
|                       |             |             |                     | H-11 $\rightarrow$ L+1 | 10.6% |
|                       |             |             |                     | H-6 $\rightarrow$ L+1  | 9.4%  |

|                          |        |        |         |            |       |
|--------------------------|--------|--------|---------|------------|-------|
|                          |        |        |         | H-11 → L   | 12.3% |
|                          |        |        |         | H-11 → L+2 | 9.9%  |
|                          |        |        |         | H-12 → L+2 | 9.8%  |
| $S_0 \rightarrow S_7$    | 3.1637 | 391.90 | 0.02690 | H-12 → L   | 7.4%  |
|                          |        |        |         | H-5 → L    | 6.5%  |
|                          |        |        |         | H-12 → L+1 | 5.6%  |
|                          |        |        |         | H-5 → L+2  | 5.5%  |
|                          |        |        |         | H-1 → L+1  | 48.5% |
| $S_0 \rightarrow S_8$    | 3.2787 | 378.15 | 0.23860 | H-1 → L+2  | 21.4% |
|                          |        |        |         | H-1 → L    | 7.2%  |
|                          |        |        |         | H-3 → L+1  | 5.1%  |
|                          |        |        |         | H-1 → L+2  | 46.8% |
| $S_0 \rightarrow S_9$    | 3.2991 | 375.81 | 0.06100 | H-1 → L+1  | 20.1% |
|                          |        |        |         | H-2 → L    | 6.2%  |
|                          |        |        |         | H-3 → L    | 5.8%  |
|                          |        |        |         | H-1 → L+3  | 35.0% |
|                          |        |        |         | H-2 → L    | 19.5% |
| $S_0 \rightarrow S_{10}$ | 3.5106 | 353.17 | 0.00470 | H-4 → L+1  | 7.3%  |
|                          |        |        |         | H-2 → L+2  | 6.2%  |
|                          |        |        |         | H → L+1    | 5.6%  |

---

**Table S15** Summary of the absorption and electrochemistry parameters

| Compounds | $\lambda_{\text{abs}}^{\text{peak}}$ (nm) <sup>a</sup> | $\epsilon$ ( $10^5 \text{M}^{-1} \text{cm}^{-1}$ ) <sup>a</sup> | $\lambda_{\text{abs}}^{\text{onset}}$ (nm) <sup>a</sup> | $E_{\text{g}}^{\text{opt}}$ (eV) <sup>b</sup> | $E^{\text{re1}}$ (eV) <sup>c</sup> | $E^{\text{re2}}$ (eV) <sup>c</sup> | $E^{\text{ox1}}$ (eV) <sup>c</sup> | $E^{\text{ox2}}$ (eV) <sup>c</sup> | HOMO (eV) <sup>d</sup> | LUMO (eV) <sup>e</sup> | $E_{\text{g}}^{\text{el}}$ (eV) <sup>f</sup> | $E_{\text{g}}^{\text{cal}}$ (eV) <sup>g</sup> |
|-----------|--------------------------------------------------------|-----------------------------------------------------------------|---------------------------------------------------------|-----------------------------------------------|------------------------------------|------------------------------------|------------------------------------|------------------------------------|------------------------|------------------------|----------------------------------------------|-----------------------------------------------|
| <b>1</b>  | 553.00                                                 | 0.85                                                            | 907.00                                                  | 1.36                                          | -0.47                              | -0.93                              | 1.16                               | 1.39                               | -5.48                  | -3.85                  | 1.63                                         | 1.92                                          |
|           | 521.00                                                 | 0.74                                                            |                                                         |                                               |                                    |                                    |                                    |                                    |                        |                        |                                              |                                               |
|           | 331.00                                                 | 1.240                                                           |                                                         |                                               |                                    |                                    |                                    |                                    |                        |                        |                                              |                                               |
| <b>2</b>  | 644.00                                                 | 0.74                                                            | 1071.00                                                 | 1.15                                          | -0.43                              | -0.72                              | 0.98                               | 1.22                               | -5.30                  | -3.89                  | 1.41                                         | 1.28                                          |
|           | 330.00                                                 | 0.93                                                            |                                                         |                                               |                                    |                                    |                                    |                                    |                        |                        |                                              |                                               |
| <b>3</b>  | 537.00                                                 | 0.26                                                            | 600.00                                                  | 2.06                                          | -0.92                              | -1.45                              | 1.24                               | 1.53                               | 5.56                   | -3.40                  | 2.16                                         | 2.49                                          |
|           | 441.00                                                 | 1.00                                                            |                                                         |                                               |                                    |                                    |                                    |                                    |                        |                        |                                              |                                               |
|           | 339.00                                                 | 1.95                                                            |                                                         |                                               |                                    |                                    |                                    |                                    |                        |                        |                                              |                                               |

a. Absorption maxima, molar extinction coefficient and onset absorption in  $10^{-5}$  mol/L dichloromethane solution.

b. Based on the onset absorption ( $E_{\text{g}}^{\text{opt}} = 1240/\lambda_{\text{abs}}^{\text{onset}}$ ).

c. Oxidative and reductive potential based on cyclic voltammograms (CV) with ferrocene as an external standard.

d. Calculated the HOMO and LUMO energy levels based on the reference of Fc/Fc<sup>+</sup>.

f. Estimated using the equation:  $E_{\text{g}}^{\text{el}} = \text{LUMO} - \text{HOMO}$ .

g. DFT calculation at (U)B3LYP-D3(BJ)/6-31G(d, p) level.

## 8. The stabilities of 1, 2 and 3

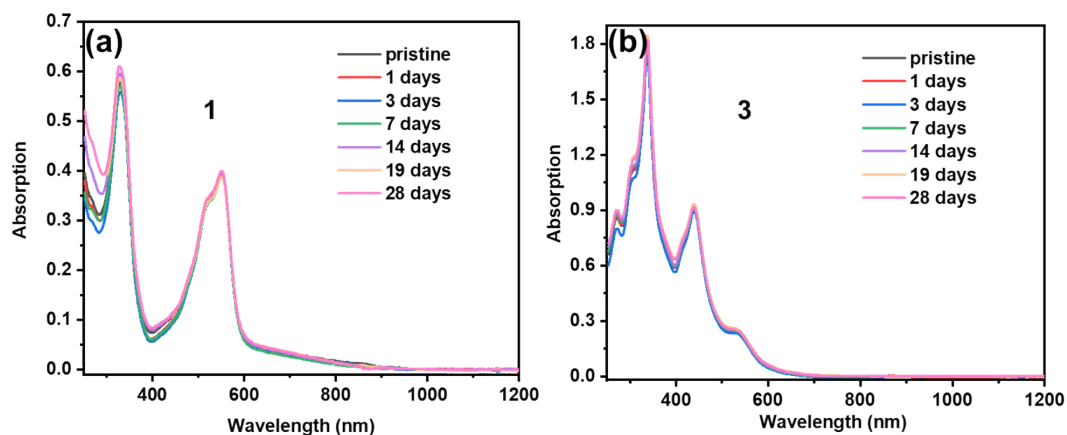

**Figure S23** Time-dependent UV-vis measurements were performed under ambient conditions for compound (a) **1** and (b) **3**. Single-crystal samples of **1** and **3** were dissolved in HPLC-grade  $\text{CH}_2\text{Cl}_2$  open to the atmosphere. The cuvette was sealed with a Teflon cap and kept on the bench top.

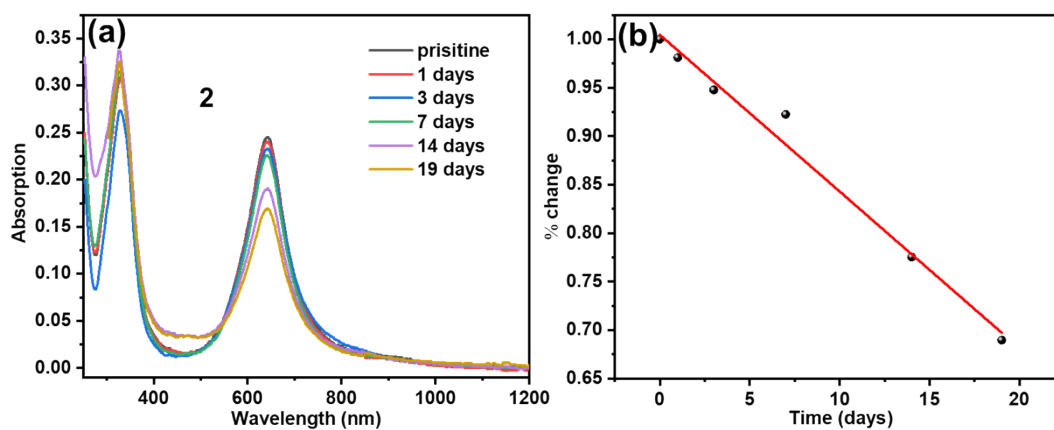

**Figure S24** (a) Time-dependent UV-vis measurements were performed under ambient conditions for compound **2**. (b) Time-dependent UV-vis absorbance of **2** in  $\text{CH}_2\text{Cl}_2$  solution. Linear regression and extrapolation to % change = 0.50 gives a half-life of ca. 32 days.

## 9. The photoluminescence and photothermal conversion of compound 1 and 2

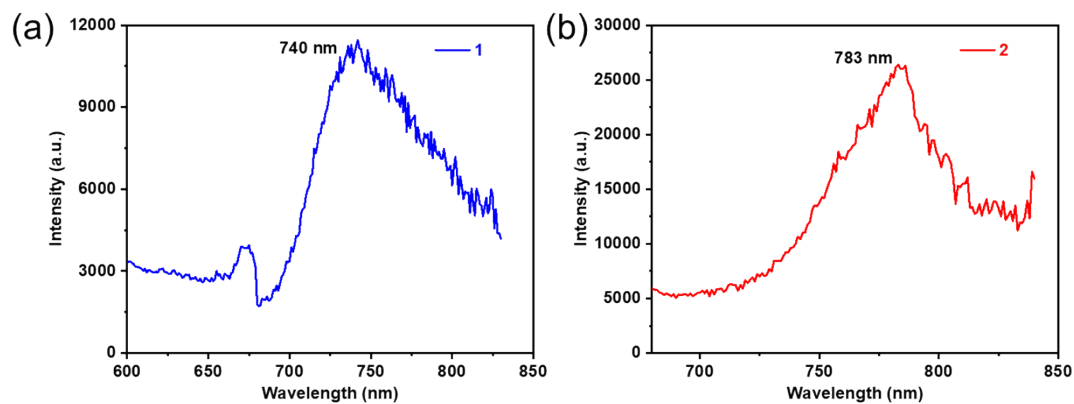

Figure S25 The photoluminescence spectra of (a) 1 and (b) 2

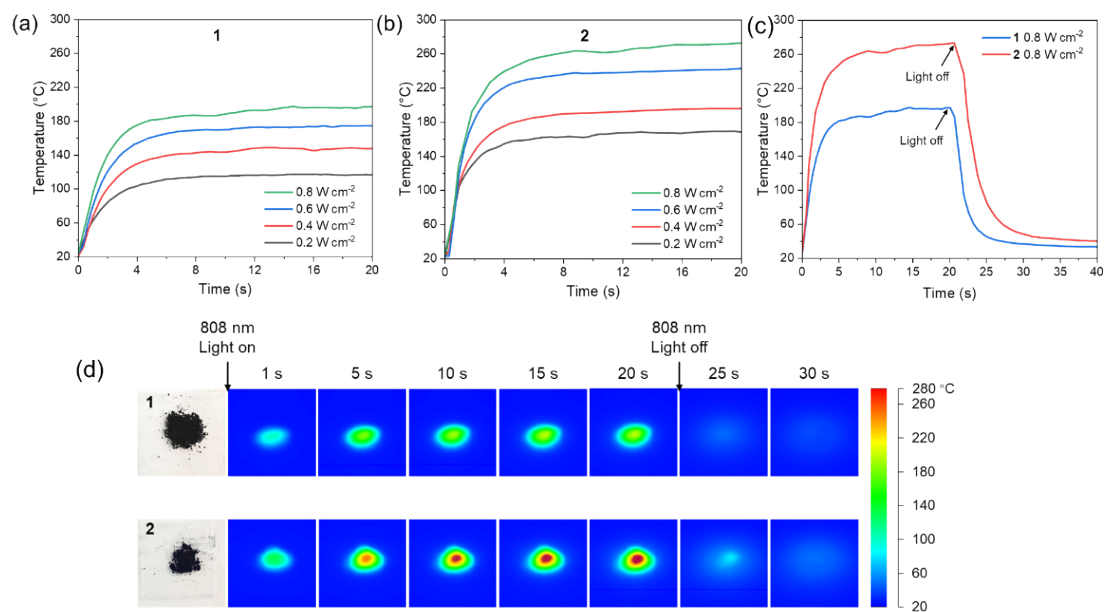

Figure S26 The photothermal conversion of compounds 1 and 2

## 10. The oxidation titration experiments

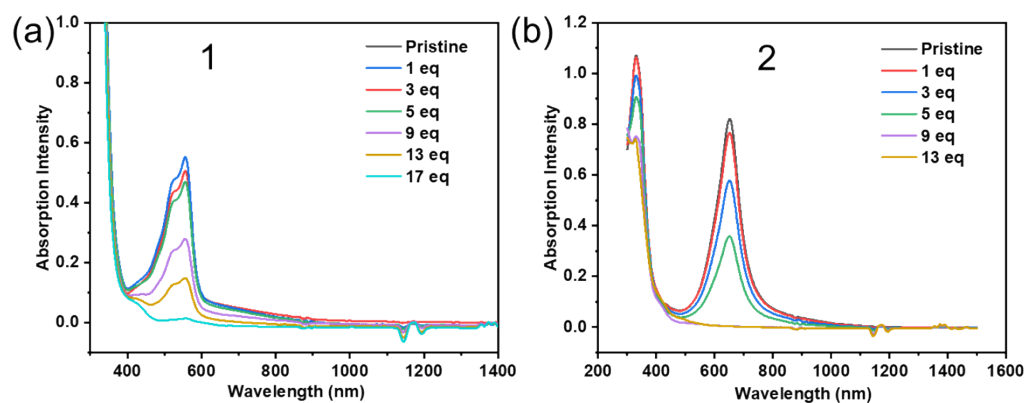

**Figure S27** UV-vis-NIR absorption spectra of (a) **1** and (b) **2** by adding  $\text{NO}\cdot\text{SbF}_6$

## 11. The variable-temperature $^1\text{H}$ NMR

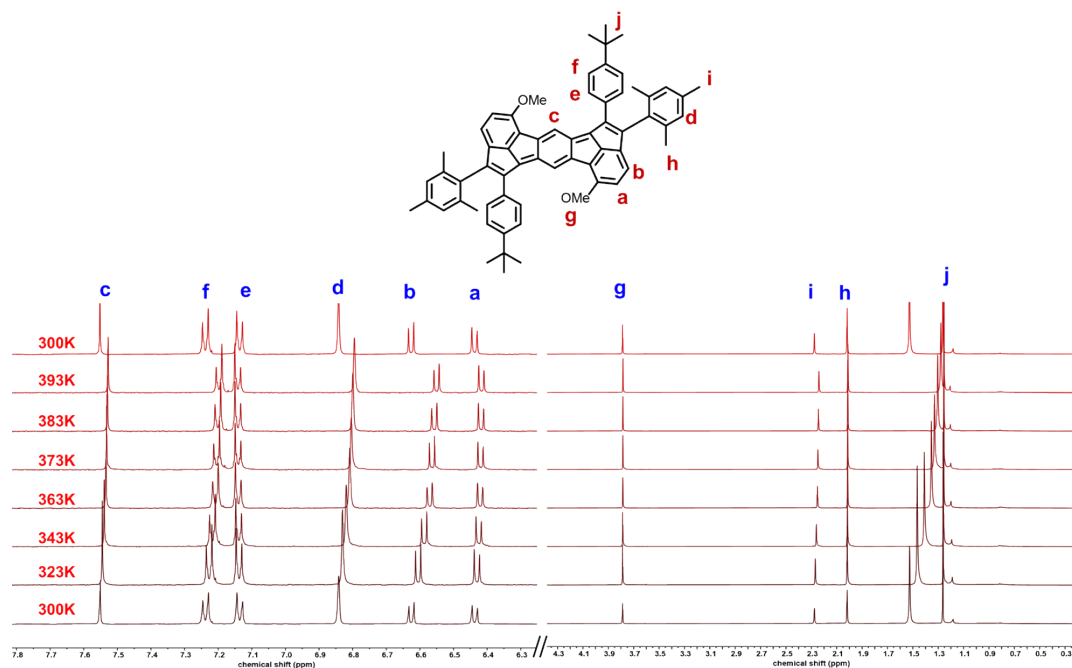

**Figure S28** The VT  $^1\text{H}$  NMR of **1** from 300 K to 393 K and then cooling to 300 K in  $\text{C}_2\text{D}_2\text{Cl}_4$  (500 MHz).

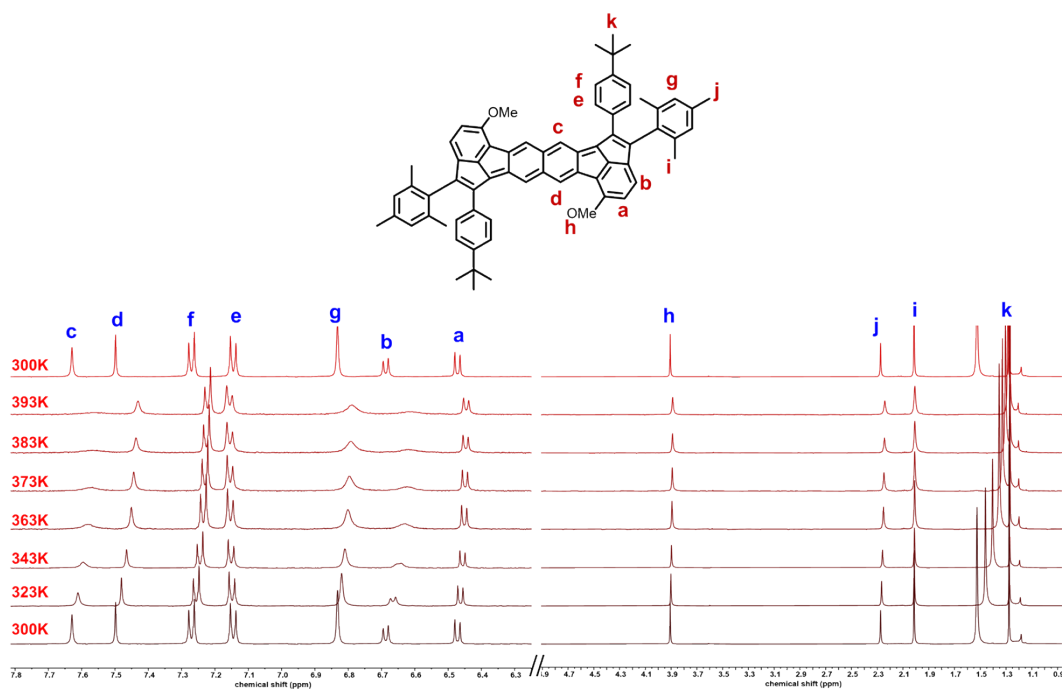

**Figure S29** The VT  $^1\text{H}$  NMR of **2** from 300 K to 393 K and then cooling to 300 K in  $\text{C}_2\text{D}_2\text{Cl}_4$  (500 MHz).

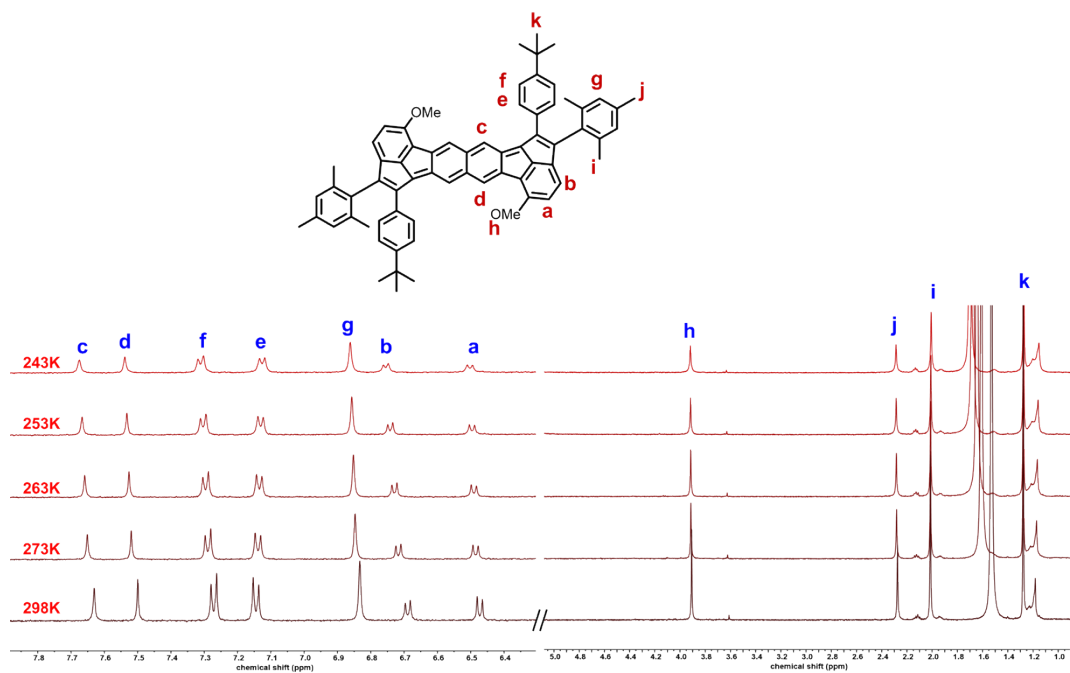

**Figure S30** The VT  $^1\text{H}$  NMR of **2** from 298 K to 243 K in  $\text{C}_2\text{D}_2\text{Cl}_4$  (500 MHz).

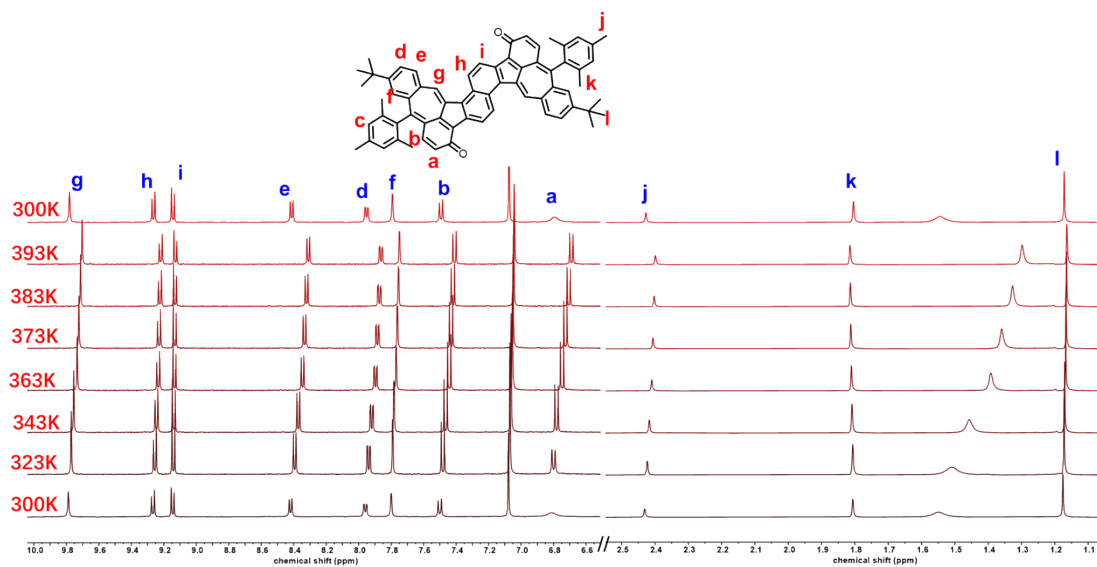

**Figure S31** The VT  $^1\text{H}$  NMR of **3** from 300 K to 393 K and then cooling to 300 K in  $\text{C}_2\text{D}_2\text{Cl}_4$  (500 MHz).

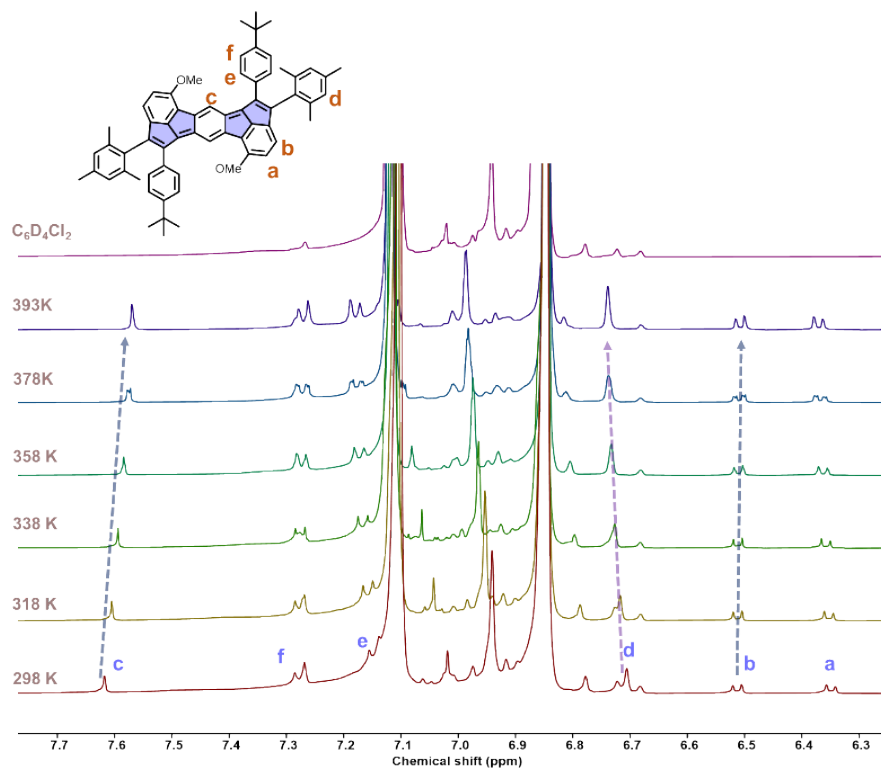

**Figure S32** The VT  $^1\text{H}$  NMR of **1** from 298 to 393 K in  $\text{C}_6\text{D}_4\text{Cl}_2$

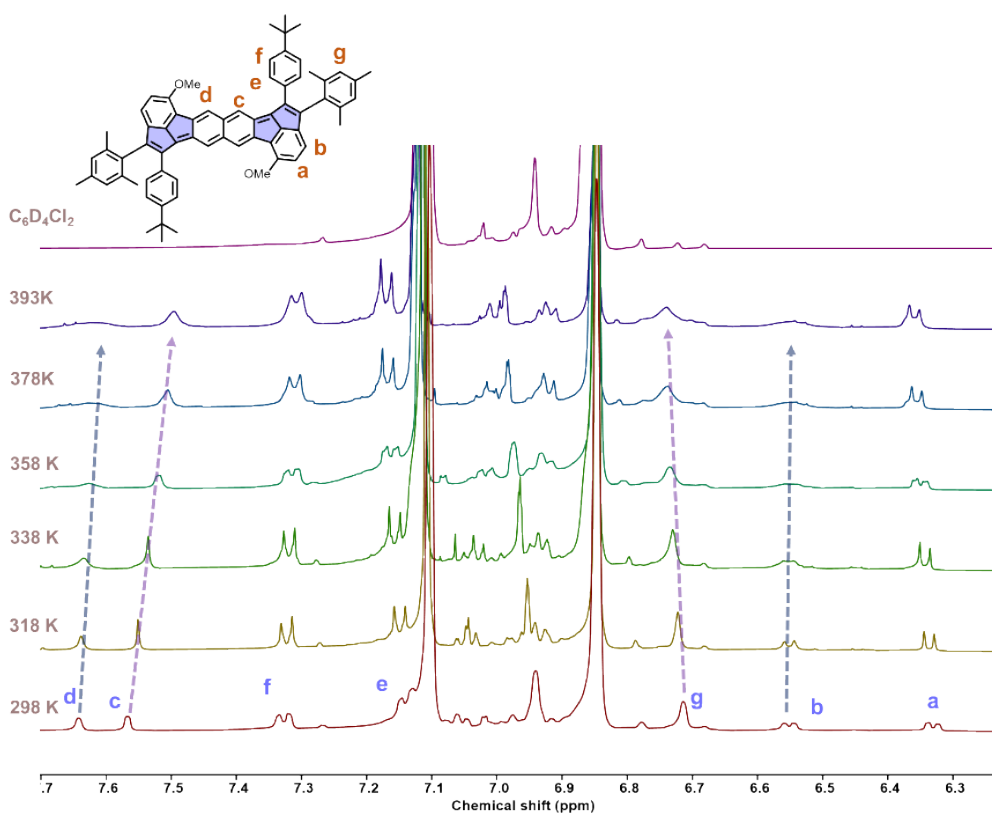

**Figure S33** The VT  $^1\text{H}$  NMR of **2** from 298 to 393 K in  $\text{C}_6\text{D}_4\text{Cl}_2$

## 12. The magnetic properties

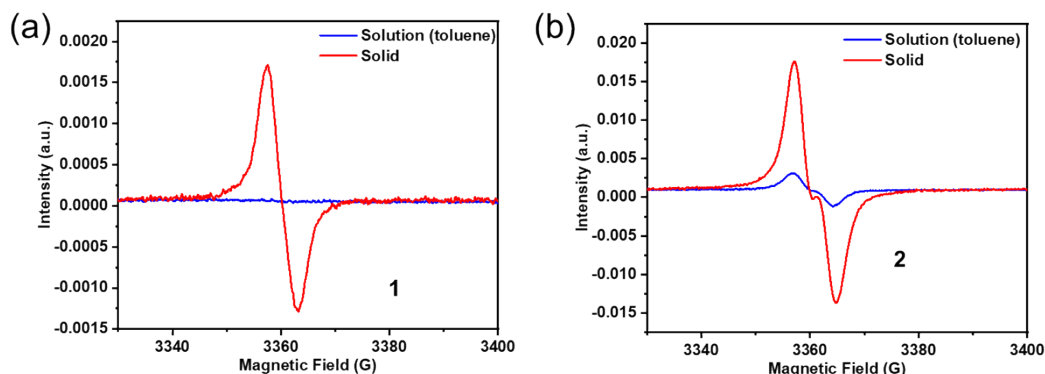

**Figure S34** The electron-spin resonance (ESR) spectra of (a) **1** and (b) **2** in toluene solution and powder at room temperature.

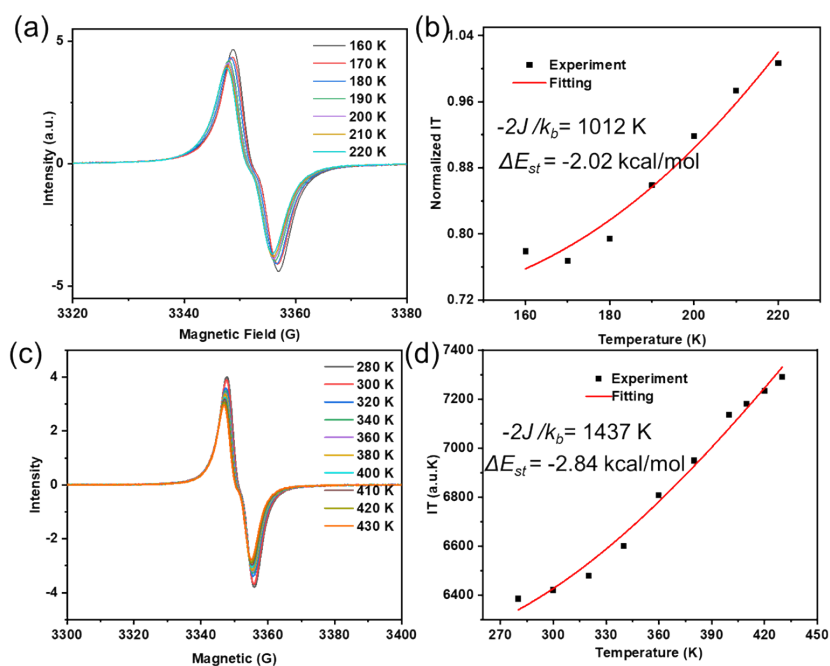

**Figure S35** (a, c) Temperature dependence of the ESR signals of **2** in powder state, 160-220 K for (a) and 280-430 K for (c). (b, d) The corresponding integrated signal multiplied by temperature and fitted with the Bleaney-Bowers equation of **2**, 160-220 K for (b) and 280-430 K for (d).

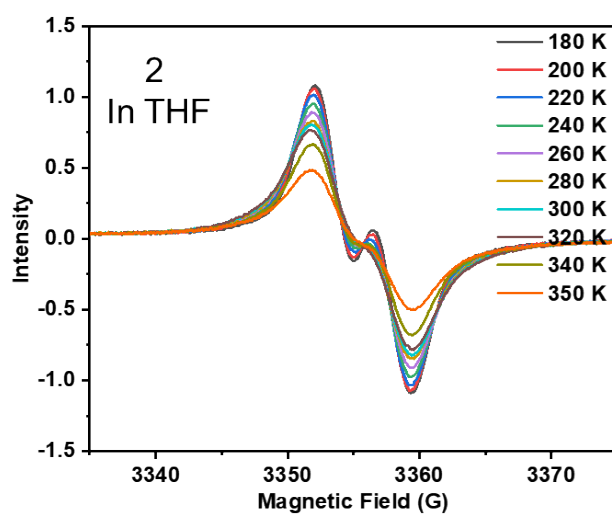

**Figure S36** Temperature dependence of the ESR signals of **2** in THF

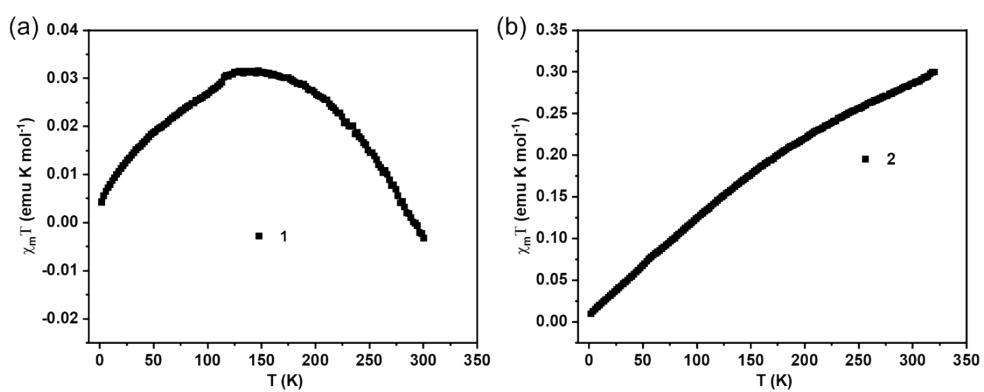

**Figure S37** SQUID measurements (black square) of the magnetic susceptibility of (a) **1** and (b) **2** from 2 to 300 K

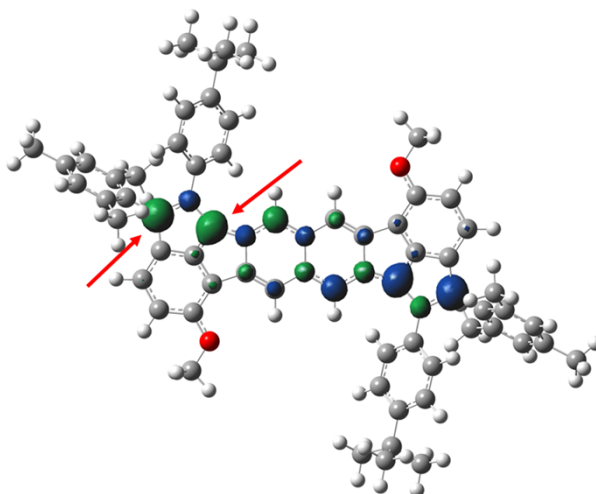

**Figure S38** Spin density surfaces calculated by DFT UB3LYP-D3(BJ)/6-31G(d,p) in the open-shell singlet state. The isovalue is 0.005.

**Table S16** The  $\Delta E_{st}$  and  $y_0$  value were calculated based on (U)B3LYP-D3(BJ)/6-31G\*\* and UCAM-B3LYP/6-31G\* level, respectively.

| Compounds | $E_s$ (Hartree) | $E_s$ (Hartree) | $E_t$ (Hartree) | $y_0$ | $\Delta E_{st}$ |
|-----------|-----------------|-----------------|-----------------|-------|-----------------|
|           | (Close-Shell)   | (Open-Shell)    |                 |       |                 |
| 1         | -2625.795129    |                 | -2625.778545    |       |                 |
| 2         | -2779.453351    | -2779.455595    | -2779.447994    | 0.38  | -7.22           |
| 3         | -2699.687238    |                 | -2699.636498    |       |                 |

### 13. OFETs fabrication and characterization

A heavily doped n-type Si wafer with a dry oxidized SiO<sub>2</sub> layer of 300 nm was employed as the gate electrode and dielectric layer. The drain-source (D-S) gold contacts were fabricated by photo-lithography. The substrates were first cleaned by sonication in acetone and water for 5 min, and immersed in Piranha solution (7:3 mixture of sulfuric acid and 30% hydrogen peroxide) for 30 min. The substrates were further rinsed with deionized water and isopropyl alcohol for three times and they were blow-dried with nitrogen. Then, the substrate was processed by UV ozone for about 10 min. After that, the substrates were placed into a petri dish, and one drop of *n*-octadecyltrichlorosilane (OTS) was dropped into the middle of petri dish. The system was stored under vacuum at 120 °C for 4 h to form an OTS self-assembled monolayer. After the substrate surfaces were modified with OTS, they were washed with *n*-hexane, CHCl<sub>3</sub> and isopropyl alcohol sequentially. Next, thin films of **2** were prepared by drop-coating of their toluene solutions (8.0 mg/mL, 10 μL) onto the modified substrates, and the substrate was pre-heated at 100 °C. After the solvent dried, the devices can be measured directly under an air atmosphere. The transfer and output curves of FETs were measured at room temperature in an air atmosphere using a Keithley 4200 SCS semiconductor parameter analyzer. The charge mobility of the OFETs in the saturation region was extracted from the following equation:

$$I_{DS} = \mu C_i (V_{GS} - V_{Th})^2 W/2L$$

Where  $I_{DS}$  is the current collected by the drain electrode;  $L$  and  $W$  are the channel length and width, respectively;  $\mu$  is the mobility of the device;  $C_i$  is the capacitance per unit area of the gate dielectric layer (11 nF/cm<sup>2</sup>);  $V_{GS}$  is the gate voltage, and  $V_{Th}$  is the threshold voltage, respectively. The  $V_{Th}$  of the device was obtained by extrapolating the  $(I_{DS,sat})^{1/2}$  vs.  $V_{GS}$  plot to  $I_{DS} = 0$ .

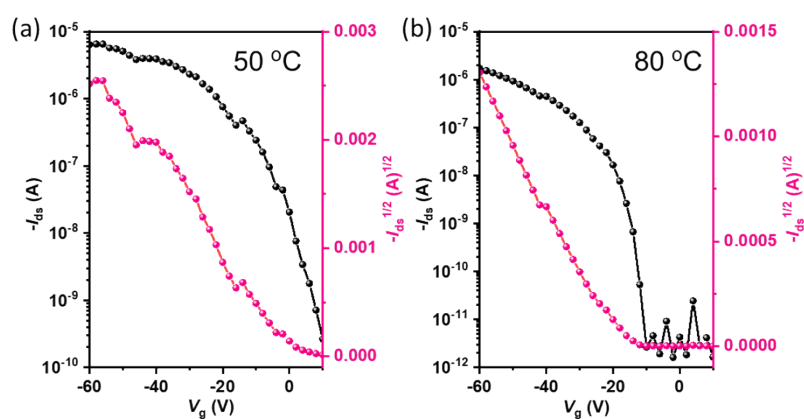

**Figure S39** Transfer characteristics of OFETs based on **2** at different thermal annealing temperatures of (a) at 50 °C and (b) at 80 °C

**Table S17** The FETs performance of BGBC devices based on the **2** thin films. The width ( $W$ ) and length ( $L$ ) of the conductive channel are 1440  $\mu\text{m}$ , and 5  $\mu\text{m}$ , respectively.

| $T_{\text{annealing}}$ | $\mu_{\text{max}}(\text{cm}^2\text{V}^{-1}\text{s}^{-1})^{\text{a}}$ | $\mu_{\text{ave}}(\text{cm}^2\text{V}^{-1}\text{s}^{-1})^{\text{b}}$ | $V_{\text{th}}(\text{V})^{\text{c}}$ | $I_{\text{on}}/I_{\text{off}}^{\text{d}}$ |
|------------------------|----------------------------------------------------------------------|----------------------------------------------------------------------|--------------------------------------|-------------------------------------------|
| rt                     | 0.083                                                                | 0.064                                                                | 0.6-3.3                              | $10^3$ - $10^4$                           |
| 50 °C                  | 0.0025                                                               | 0.0021                                                               | 5.2-8.6                              | $10^3$ - $10^4$                           |
| 80 °C                  | 0.000064                                                             | 0.000058                                                             | 14.2-18.6                            | $10^5$ - $10^6$                           |

<sup>a</sup> maximum hole mobility; <sup>b</sup> average hole mobility; <sup>c</sup> threshold voltage; <sup>d</sup> current on/off ratio. The average mobility was obtained based on 13 FET devices.

## 14. Atomic Cartesian coordinates of the optimized geometry

**Table S13** Cartesian coordinates of the optimized geometry of **1** at the B3LYP-D3(BJ)/6-31G(d,p) level of theory.

|   |             |             |             |
|---|-------------|-------------|-------------|
| C | -0.93951700 | 1.11391500  | -0.06078100 |
| C | 0.40351100  | 1.33770100  | -0.05963500 |
| C | 1.38557300  | 0.20680300  | -0.07108600 |
| C | 0.90832700  | -1.14394900 | -0.06351900 |
| C | -0.43509700 | -1.36819600 | -0.06557600 |
| C | -1.41569900 | -0.23627300 | -0.07391100 |
| C | -1.21312500 | -2.62607800 | -0.02918100 |
| C | -2.51940400 | -2.20320500 | -0.02057400 |
| C | -2.69986600 | -0.77886300 | -0.06295700 |
| C | 1.17783000  | 2.59631900  | -0.01879400 |
| C | 2.48474700  | 2.17655600  | -0.01273400 |
| C | 2.66944900  | 0.75225600  | -0.05853000 |
| C | -3.70309500 | -2.90935700 | 0.06022800  |
| C | -4.74925300 | -1.85424200 | 0.06078700  |
| C | -4.14422700 | -0.58728800 | -0.01752700 |
| C | 3.66537000  | 2.88739900  | 0.06820200  |
| C | 4.71516500  | 1.83707700  | 0.06341000  |
| C | 4.11575500  | 0.56686600  | -0.01523400 |
| C | -1.05480500 | -4.02179600 | 0.02366800  |
| C | -2.22311300 | -4.82255500 | 0.08384800  |
| C | -3.53733800 | -4.29716600 | 0.10457700  |
| C | 1.01386200  | 3.99101600  | 0.04038600  |
| C | 2.17902300  | 4.79591300  | 0.10178400  |
| C | 3.49496300  | 4.27449500  | 0.11776900  |
| O | 0.21968000  | -4.50731900 | 0.01351900  |
| O | -0.26303500 | 4.47025300  | 0.03526200  |
| C | 4.80136200  | -0.72957200 | -0.05758900 |
| C | 6.16241500  | 2.12682900  | 0.10586400  |
| C | -4.81772100 | 0.71568000  | -0.05595600 |
| C | -6.19830700 | -2.13340500 | 0.10815500  |
| C | -6.75844200 | -2.69676600 | 1.27568400  |
| C | -8.12774100 | -2.96441800 | 1.31148700  |
| C | -8.95836700 | -2.69944600 | 0.21944200  |
| C | -8.38229200 | -2.15486400 | -0.92989900 |
| C | -7.01869400 | -1.86193100 | -1.00699500 |
| C | -4.29648500 | 1.74630400  | -0.85823000 |
| C | -4.90008700 | 2.99595700  | -0.90253200 |
| C | -6.05258900 | 3.28263900  | -0.15370600 |
| C | -6.57515300 | 2.24909000  | 0.63351700  |
| C | -5.97441700 | 0.99243700  | 0.68564300  |

|   |              |             |             |
|---|--------------|-------------|-------------|
| C | 4.28360000   | -1.77155300 | -0.84092300 |
| C | 4.90945400   | -3.01535500 | -0.89810000 |
| C | 6.08323500   | -3.27347300 | -0.18100500 |
| C | 6.60152000   | -2.22381200 | 0.59577700  |
| C | 5.98099000   | -0.98333800 | 0.66347800  |
| C | 6.98126900   | 1.86245800  | -1.01174300 |
| C | 8.34458100   | 2.15768500  | -0.93536700 |
| C | 8.92059700   | 2.70231900  | 0.21372700  |
| C | 8.09234200   | 2.95415400  | 1.31099800  |
| C | 6.72362100   | 2.68435700  | 1.27594600  |
| C | -6.44923000  | -1.27233600 | -2.27336600 |
| C | -5.90294000  | -2.96721700 | 2.49000500  |
| C | -10.44072800 | -2.96924900 | 0.29143700  |
| C | -6.67818400  | 4.68107200  | -0.22365200 |
| C | -7.10790900  | 4.97541800  | -1.67730500 |
| C | -7.91380600  | 4.81307300  | 0.68096400  |
| C | -5.63634000  | 5.72912500  | 0.22535200  |
| C | 6.41269000   | 1.26910800  | -2.27672000 |
| C | 5.87112300   | 2.93675800  | 2.49622700  |
| C | 10.39081000  | 3.03631200  | 0.26250700  |
| C | 6.80292900   | -4.62729700 | -0.21451500 |
| C | 6.08063600   | -5.64837900 | -1.10792200 |
| C | 8.23316700   | -4.43046300 | -0.76228000 |
| C | 6.87629400   | -5.20300300 | 1.21633400  |
| C | -0.45898600  | 5.87286300  | 0.11469500  |
| C | 0.40736400   | -5.91186000 | 0.07626600  |
| H | -1.63853000  | 1.94200800  | -0.03632900 |
| H | 1.60717600   | -1.97221000 | -0.04028400 |
| H | -2.11521500  | -5.89967700 | 0.12138400  |
| H | -4.37750500  | -4.98355000 | 0.15533800  |
| H | 2.06730800   | 5.87251500  | 0.14375100  |
| H | 4.33317200   | 4.96319900  | 0.16949700  |
| H | -8.55706300  | -3.38712700 | 2.21687700  |
| H | -9.01035600  | -1.95505100 | -1.79490300 |
| H | -3.41994500  | 1.55036800  | -1.46676900 |
| H | -4.46418900  | 3.76037500  | -1.53827700 |
| H | -7.46250700  | 2.41755400  | 1.23182700  |
| H | -6.40181700  | 0.22173300  | 1.31631500  |
| H | 3.39101400   | -1.59544400 | -1.43189200 |
| H | 4.46799300   | -3.78429400 | -1.52068300 |
| H | 7.50850700   | -2.37884600 | 1.17179200  |
| H | 6.40689600   | -0.20384700 | 1.28384700  |
| H | 8.97281100   | 1.95654900  | -1.79987700 |
| H | 8.52382500   | 3.36518500  | 2.22075400  |

|   |              |             |             |
|---|--------------|-------------|-------------|
| H | -7.14936300  | -1.39150100 | -3.10431700 |
| H | -6.24624400  | -0.20271200 | -2.15423800 |
| H | -5.50279200  | -1.74719300 | -2.54660400 |
| H | -5.31475900  | -2.08505300 | 2.76363100  |
| H | -6.52092800  | -3.24782100 | 3.34656200  |
| H | -5.18483800  | -3.77337000 | 2.31004800  |
| H | -10.66047300 | -3.82555300 | 0.93591700  |
| H | -10.98003200 | -2.10661500 | 0.70218000  |
| H | -10.85816400 | -3.17187500 | -0.69905500 |
| H | -7.55291400  | 5.97392500  | -1.74937000 |
| H | -6.25895500  | 4.93613800  | -2.36545400 |
| H | -7.84846400  | 4.24500500  | -2.01751200 |
| H | -8.32304500  | 5.82491700  | 0.60145100  |
| H | -7.66606900  | 4.63598000  | 1.73217700  |
| H | -8.70334000  | 4.11245100  | 0.39202400  |
| H | -4.74862600  | 5.71562400  | -0.41355600 |
| H | -6.06516600  | 6.73626600  | 0.18202100  |
| H | -5.31247200  | 5.53799600  | 1.25316000  |
| H | 5.46205800   | 1.73731900  | -2.54675300 |
| H | 7.10946200   | 1.39404900  | -3.10963900 |
| H | 6.21782200   | 0.19796600  | -2.15765800 |
| H | 6.49001500   | 3.21846200  | 3.35176500  |
| H | 5.14337400   | 3.73609500  | 2.32483000  |
| H | 5.29385100   | 2.04639500  | 2.76668800  |
| H | 10.96457200  | 2.41578700  | -0.43169900 |
| H | 10.56800700  | 4.08355400  | -0.01215200 |
| H | 10.79977300  | 2.89174600  | 1.26701000  |
| H | 6.62824300   | -6.59583600 | -1.10231800 |
| H | 5.06483400   | -5.84930100 | -0.75263400 |
| H | 6.01909300   | -5.30648900 | -2.14574200 |
| H | 8.76701600   | -5.38670600 | -0.78887300 |
| H | 8.81122700   | -3.74059600 | -0.14150000 |
| H | 8.20662600   | -4.02436300 | -1.77822200 |
| H | 5.87263100   | -5.34640500 | 1.62848800  |
| H | 7.38762400   | -6.17194600 | 1.21172400  |
| H | 7.42314700   | -4.53951000 | 1.89179000  |
| H | -1.53896100  | 6.02615700  | 0.10903000  |
| H | -0.03844100  | 6.28562800  | 1.04002000  |
| H | -0.01320600  | 6.39041600  | -0.74387300 |
| H | 1.48616900   | -6.07194700 | 0.06134600  |
| H | -0.00956900  | -6.33238100 | 0.99974900  |
| H | -0.04716300  | -6.41711200 | -0.78500400 |

---

**Table S14** Cartesian coordinates of the optimized geometry of **2** at the UB3LYP-D3(BJ)/6-31G(d,p) level of theory.

|   |             |             |             |
|---|-------------|-------------|-------------|
| C | -1.71686500 | -1.87235500 | 0.02868600  |
| C | -2.47221400 | -0.59730700 | 0.01217600  |
| C | -1.76904900 | 0.60954100  | 0.01740100  |
| C | -0.36640000 | 0.62435400  | 0.02320700  |
| C | 0.36639800  | -0.62434300 | 0.02320200  |
| C | -0.35302600 | -1.86418400 | 0.03196200  |
| C | 0.35302400  | 1.86419500  | 0.03197400  |
| C | 1.71686300  | 1.87236600  | 0.02869800  |
| C | 2.47221200  | 0.59731900  | 0.01218000  |
| C | 1.76904700  | -0.60952900 | 0.01739600  |
| C | 3.86600600  | 0.91467000  | 0.00987600  |
| C | -3.86600800 | -0.91465900 | 0.00987200  |
| C | -2.69761600 | -2.97671700 | 0.05523300  |
| C | 2.69761400  | 2.97672800  | 0.05525100  |
| C | 5.23833300  | 0.48600100  | 0.02424900  |
| C | -5.23833600 | -0.48599000 | 0.02424400  |
| C | 2.77424800  | 4.38323500  | 0.09544800  |
| C | 4.05655900  | 4.98155200  | 0.12578200  |
| C | 5.26780500  | 4.24604000  | 0.12622800  |
| C | 5.20475200  | 2.85122800  | 0.09846100  |
| C | 3.91688400  | 2.34273700  | 0.05170900  |
| C | -2.77425100 | -4.38322500 | 0.09541400  |
| C | -4.05656200 | -4.98154200 | 0.12573900  |
| C | -5.26780800 | -4.24602900 | 0.12618800  |
| C | -5.20475500 | -2.85121700 | 0.09843300  |
| C | -3.91688600 | -2.34272600 | 0.05169400  |
| C | -6.06245100 | -1.64789100 | 0.07627400  |
| C | 6.06244800  | 1.64790000  | 0.07630300  |
| C | -5.70351900 | 0.90472900  | -0.02201100 |
| C | 5.70351600  | -0.90471700 | -0.02202300 |
| C | -6.84077900 | 1.34101000  | 0.67926000  |
| C | -7.25985300 | 2.66272400  | 0.60126600  |
| C | -6.57313700 | 3.61621000  | -0.16844800 |
| C | -5.43914200 | 3.17781800  | -0.86207600 |
| C | -5.01416900 | 1.85225100  | -0.79298900 |
| C | 5.01417800  | -1.85222500 | -0.79302800 |
| C | 5.43915300  | -3.17779000 | -0.86213500 |
| C | 6.57314100  | -3.61619400 | -0.16850000 |
| C | 7.25984500  | -2.66272100 | 0.60124000  |
| C | 6.84076800  | -1.34101000 | 0.67925400  |
| C | -7.07936400 | 5.06285100  | -0.22273300 |

---

|   |              |             |             |
|---|--------------|-------------|-------------|
| C | -7.08843700  | 5.65567400  | 1.20300700  |
| C | -6.19730600  | 5.95606900  | -1.10981300 |
| C | -8.51399300  | 5.07885900  | -0.79383400 |
| C | 7.07937100   | -5.06283300 | -0.22280800 |
| C | 6.19732900   | -5.95603400 | -1.10992000 |
| C | 8.51400900   | -5.07882500 | -0.79388800 |
| C | 7.08842400   | -5.65568500 | 1.20292000  |
| O | -1.59781700  | -5.07133800 | 0.10156500  |
| C | -1.64761600  | -6.48895800 | 0.14638500  |
| O | 1.59781400   | 5.07134800  | 0.10160300  |
| C | 1.64761200   | 6.48896600  | 0.14648400  |
| C | -7.53722100  | -1.68039000 | 0.06470400  |
| C | -8.25604100  | -1.25342700 | -1.07255400 |
| C | -9.65151800  | -1.30368500 | -1.04857800 |
| C | -10.35694700 | -1.75981200 | 0.06667600  |
| C | -9.62719900  | -2.17572700 | 1.18342800  |
| C | -8.23180800  | -2.15181400 | 1.20083100  |
| C | -7.48527500  | -2.57313500 | 2.44398900  |
| C | -7.54711300  | -0.75032100 | -2.30531800 |
| C | -11.86369000 | -1.82895300 | 0.05646200  |
| C | 7.53721800   | 1.68038900  | 0.06474000  |
| C | 8.25604000   | 1.25340700  | -1.07251000 |
| C | 9.65151800   | 1.30363900  | -1.04852200 |
| C | 10.35694700  | 1.75975500  | 0.06673500  |
| C | 9.62719600   | 2.17568900  | 1.18348100  |
| C | 8.23180600   | 2.15180300  | 1.20087300  |
| C | 7.48527300   | 2.57312400  | 2.44403100  |
| C | 7.54711900   | 0.75029500  | -2.30527600 |
| C | 11.86369100  | 1.82886900  | 0.05653400  |
| H | -2.30765500  | 1.55187500  | 0.02493300  |
| H | 0.20244000   | -2.79692500 | 0.04457000  |
| H | -0.20244200  | 2.79693700  | 0.04458800  |
| H | 2.30765300   | -1.55186400 | 0.02492200  |
| H | 4.12823600   | 6.06181700  | 0.15260400  |
| H | 6.20973600   | 4.78646500  | 0.14862700  |
| H | -4.12823900  | -6.06180700 | 0.15255300  |
| H | -6.20973900  | -4.78645400 | 0.14857800  |
| H | -7.39437300  | 0.63851100  | 1.29077100  |
| H | -8.14202500  | 2.95838000  | 1.16064400  |
| H | -4.87516900  | 3.86805800  | -1.47797700 |
| H | -4.14978400  | 1.53614400  | -1.36802500 |
| H | 4.14980100   | -1.53610900 | -1.36807000 |
| H | 4.87519000   | -3.86801900 | -1.47805600 |
| H | 8.14201000   | -2.95838700 | 1.16062400  |

---

|   |              |             |             |
|---|--------------|-------------|-------------|
| H | 7.39435300   | -0.63852100 | 1.29078500  |
| H | -7.45291700  | 6.68860600  | 1.18414400  |
| H | -7.73553100  | 5.08459400  | 1.87426100  |
| H | -6.08058100  | 5.65554700  | 1.62962600  |
| H | -6.59480400  | 6.97562900  | -1.11673300 |
| H | -6.17405800  | 5.60196400  | -2.14514000 |
| H | -5.16823300  | 6.00317100  | -0.73997900 |
| H | -8.53277700  | 4.66418000  | -1.80649400 |
| H | -9.19990400  | 4.48987700  | -0.17889200 |
| H | -8.89675700  | 6.10449400  | -0.83591500 |
| H | 6.59482900   | -6.97559300 | -1.11685500 |
| H | 5.16825000   | -6.00314600 | -0.74010300 |
| H | 6.17409600   | -5.60190900 | -2.14524000 |
| H | 8.89677600   | -6.10445800 | -0.83598400 |
| H | 9.19990900   | -4.48985500 | -0.17892400 |
| H | 8.53280700   | -4.66412600 | -1.80653800 |
| H | 6.08056200   | -5.65557000 | 1.62952400  |
| H | 7.45290700   | -6.68861700 | 1.18404100  |
| H | 7.73550700   | -5.08461900 | 1.87419600  |
| H | -0.61085700  | -6.82707600 | 0.14743200  |
| H | -2.14713000  | -6.84394300 | 1.05617200  |
| H | -2.16360100  | -6.90003200 | -0.73001300 |
| H | 0.61085200   | 6.82708300  | 0.14755800  |
| H | 2.14713700   | 6.84391200  | 1.05627900  |
| H | 2.16358500   | 6.90007900  | -0.72990400 |
| H | -10.20180600 | -0.97837900 | -1.92833600 |
| H | -10.15782800 | -2.52098000 | 2.06768700  |
| H | -8.17656300  | -2.74460800 | 3.27291600  |
| H | -6.91311900  | -3.49222400 | 2.28374900  |
| H | -6.76301700  | -1.80918500 | 2.75011300  |
| H | -6.67659500  | -1.36660100 | -2.54647200 |
| H | -8.22122200  | -0.75075000 | -3.16583900 |
| H | -7.18364500  | 0.27273100  | -2.16222200 |
| H | -12.29405400 | -1.06587600 | -0.59852400 |
| H | -12.21249300 | -2.80391300 | -0.30607900 |
| H | -12.27664600 | -1.68950000 | 1.05988500  |
| H | 10.20180600  | 0.97831900  | -1.92827500 |
| H | 10.15782500  | 2.52093400  | 2.06774300  |
| H | 8.17656800   | 2.74466600  | 3.27293700  |
| H | 6.91305600   | 3.49217000  | 2.28377200  |
| H | 6.76306900   | 1.80913800  | 2.75019700  |
| H | 7.18376600   | -0.27280400 | -2.16221700 |
| H | 6.67652800   | 1.36649400  | -2.54636800 |
| H | 8.22119800   | 0.75083700  | -3.16582000 |

---

|   |             |            |             |
|---|-------------|------------|-------------|
| H | 12.21251500 | 2.80381700 | -0.30601700 |
| H | 12.27663500 | 1.68942000 | 1.05996300  |
| H | 12.29404600 | 1.06577500 | -0.59843800 |

---

**Table S15** Cartesian coordinates of the optimized geometry of **3** at the B3LYP-D3(BJ)/6-31G(d,p) level of theory.

|   |             |             |             |
|---|-------------|-------------|-------------|
| O | -2.62381700 | -4.76384800 | -0.68004000 |
| O | 2.61480100  | 4.74845100  | -0.70276000 |
| C | -3.98691200 | -1.41450500 | -0.25219600 |
| C | -3.24366400 | -0.15465400 | -0.10856500 |
| C | -3.06402900 | -2.43866900 | -0.40566000 |
| C | 3.23339600  | 0.14234000  | -0.10923400 |
| C | -1.81953500 | -0.47784100 | -0.26928100 |
| C | 1.80854300  | 0.46591200  | -0.27113300 |
| C | 1.71727600  | 1.86391000  | -0.40883200 |
| C | 0.63406400  | -0.34436000 | -0.32749700 |
| C | 0.66216800  | -1.76254100 | -0.46679900 |
| H | 1.61346900  | -2.25718900 | -0.60518100 |
| C | 3.75470500  | -1.05628000 | 0.27240700  |
| H | 3.03896200  | -1.83613800 | 0.49947000  |
| C | 3.97684500  | 1.40129900  | -0.25935100 |
| C | -0.64494600 | 0.33276600  | -0.32895200 |
| C | -1.72777700 | -1.87671800 | -0.40080300 |
| C | 5.11461500  | -1.48403700 | 0.42714800  |
| C | 5.39458600  | 1.64366300  | -0.23466600 |
| C | 6.31298800  | -0.71798900 | 0.22171700  |
| C | -5.40391300 | -1.65598400 | -0.22589700 |
| C | -4.88850300 | -4.06530900 | -0.55101000 |
| H | -5.21598800 | -5.09359100 | -0.66898200 |
| C | -3.76676100 | 1.04564000  | 0.26725700  |
| H | -3.05151100 | 1.82701800  | 0.49069300  |
| C | 3.05450500  | 2.42474200  | -0.41716400 |
| C | -5.78166800 | -3.06163800 | -0.40569900 |
| H | -6.83800700 | -3.29548400 | -0.40780300 |
| C | -5.12637700 | 1.47222400  | 0.41918000  |
| C | -6.42333500 | -0.72036800 | -0.06265800 |
| C | 6.41305400  | 0.71032000  | -0.06518400 |
| C | -3.43458100 | -3.83680300 | -0.55577900 |
| C | 0.47393800  | 2.50835300  | -0.53784400 |
| H | 0.44713200  | 3.58056000  | -0.68678100 |
| C | 7.82501600  | 1.22666100  | -0.16190300 |
| C | -7.83376200 | -1.24193500 | -0.15827800 |
| C | -0.67287200 | 1.75007100  | -0.47369600 |
| H | -1.62401900 | 2.24460200  | -0.61357200 |
| C | -6.32329900 | 0.70784300  | 0.21626200  |
| C | 7.66076200  | -2.76000900 | 0.68726100  |
| C | -0.48412100 | -2.52141900 | -0.52748100 |

|   |              |             |             |
|---|--------------|-------------|-------------|
| H | -0.45727000  | -3.59423000 | -0.67200600 |
| C | 7.53848700   | -1.41908800 | 0.34951200  |
| H | 8.44610300   | -0.86223700 | 0.17855800  |
| C | 3.42585800   | 3.82237100  | -0.57475400 |
| C | -5.26526200  | 2.83960400  | 0.77462200  |
| H | -4.35745200  | 3.41187300  | 0.93946700  |
| C | 5.25421600   | -2.84663800 | 0.78632300  |
| H | 4.34692400   | -3.41981000 | 0.95108100  |
| C | 8.50980400   | 1.62716800  | 1.00055300  |
| C | -7.55534200  | 1.41006200  | 0.33734900  |
| H | -8.45692100  | 0.84864400  | 0.16297000  |
| C | 8.47152200   | 1.24792600  | -1.41079100 |
| C | -7.67471700  | 2.74826600  | 0.66883300  |
| C | 5.77263300   | 3.04819000  | -0.42304300 |
| H | 6.82929000   | 3.28108600  | -0.42749900 |
| C | -8.47666800  | -1.27885200 | -1.40860200 |
| C | 9.80422500   | 1.66453000  | -1.47525600 |
| H | 10.30515200  | 1.67411400  | -2.44013300 |
| C | -6.48384200  | 3.46559400  | 0.90250300  |
| H | -6.51564600  | 4.51527100  | 1.17474700  |
| C | 9.06061400   | -3.37546100 | 0.79645200  |
| C | 6.47539900   | -3.47670200 | 0.91974900  |
| H | 6.50170600   | -4.52379200 | 1.19502100  |
| C | 4.87972500   | 4.05116200  | -0.57315400 |
| H | 5.20690200   | 5.07877000  | -0.69748600 |
| C | -8.51701100  | -1.64300700 | 1.00480700  |
| C | -9.84171700  | -2.07257900 | 0.89614600  |
| H | -10.36967800 | -2.37998300 | 1.79561300  |
| C | 9.84017400   | 2.03957200  | 0.89287400  |
| H | 10.36946900  | 2.34601100  | 1.79184400  |
| C | 10.50633800  | 2.06438600  | -0.33577100 |
| C | -9.80385500  | -1.71224200 | -1.47398800 |
| H | -10.30198400 | -1.73393400 | -2.44013400 |
| C | -7.75019600  | -0.84673000 | -2.65804800 |
| H | -8.41268400  | -0.87663300 | -3.52619200 |
| H | -6.89202100  | -1.49555400 | -2.86246500 |
| H | -7.36064400  | 0.17206700  | -2.55980200 |
| C | -10.50395400 | -2.11396900 | -0.33404200 |
| C | 7.74385800   | 0.81466100  | -2.65915400 |
| H | 6.89081600   | 1.46867400  | -2.86822800 |
| H | 7.34697900   | -0.20080200 | -2.55605600 |
| H | 8.40798600   | 0.83497600  | -3.52630000 |
| C | -7.83282700  | -1.60144600 | 2.34822100  |
| H | -7.50303200  | -0.58631000 | 2.59399500  |

|   |              |             |             |
|---|--------------|-------------|-------------|
| H | -6.94067700  | -2.23622800 | 2.35947000  |
| H | -8.50372600  | -1.94270300 | 3.13997600  |
| C | 9.85905800   | -2.62451200 | 1.88542900  |
| H | 9.95926300   | -1.56068500 | 1.65277000  |
| H | 10.86600100  | -3.04602300 | 1.97305500  |
| H | 9.36638700   | -2.71153700 | 2.85892500  |
| C | 7.82259500   | 1.59972300  | 2.34278800  |
| H | 8.49390800   | 1.94297100  | 3.13329000  |
| H | 7.48739400   | 0.58807400  | 2.59542900  |
| H | 6.93388600   | 2.23927500  | 2.34732100  |
| C | -9.03464900  | 3.44227900  | 0.78831200  |
| C | 9.78517200   | -3.23116500 | -0.56010300 |
| H | 9.23368200   | -3.74632400 | -1.35273700 |
| H | 10.78762100  | -3.66813100 | -0.50105400 |
| H | 9.89355200   | -2.18278800 | -0.85166300 |
| C | 9.00848700   | -4.86571900 | 1.16731500  |
| H | 8.52701700   | -5.02554500 | 2.13720900  |
| H | 10.02511200  | -5.26428900 | 1.23331000  |
| H | 8.47101000   | -5.45194500 | 0.41523600  |
| C | 11.93542700  | 2.53741500  | -0.43124400 |
| H | 12.44370800  | 2.09999600  | -1.29509000 |
| H | 12.50319800  | 2.27717100  | 0.46688500  |
| H | 11.98315700  | 3.62764500  | -0.54123800 |
| C | -11.92679100 | -2.60534800 | -0.43029000 |
| H | -11.96098700 | -3.69684600 | -0.53256300 |
| H | -12.43781500 | -2.18022900 | -1.29864200 |
| H | -12.50036800 | -2.34550100 | 0.46426900  |
| C | -10.20491200 | 2.48683900  | 0.50080300  |
| H | -10.15956400 | 2.08094900  | -0.51450100 |
| H | -11.15064800 | 3.02763900  | 0.60069200  |
| H | -10.22644500 | 1.64552900  | 1.20038600  |
| C | -9.19453900  | 3.99339900  | 2.22183000  |
| H | -9.15622100  | 3.18307600  | 2.95636200  |
| H | -10.15761200 | 4.50410300  | 2.32522500  |
| H | -8.40810000  | 4.71110300  | 2.47157300  |
| C | -9.09536400  | 4.60842400  | -0.22213100 |
| H | -8.30765300  | 5.34514600  | -0.04086500 |
| H | -10.05855200 | 5.12381400  | -0.14721400 |
| H | -8.98253700  | 4.24070700  | -1.24659300 |

---

## 15. $^1\text{H}$ NMR and $^{13}\text{C}$ NMR spectra

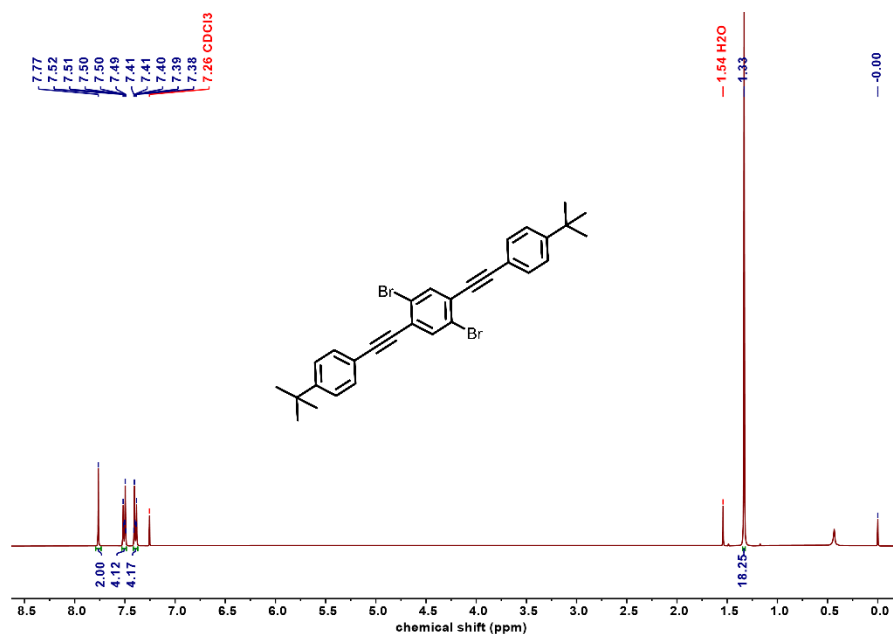

Figure S40  $^1\text{H}$  NMR spectrum of compound **5** (400 MHz,  $\text{CDCl}_3$ , 298 K)

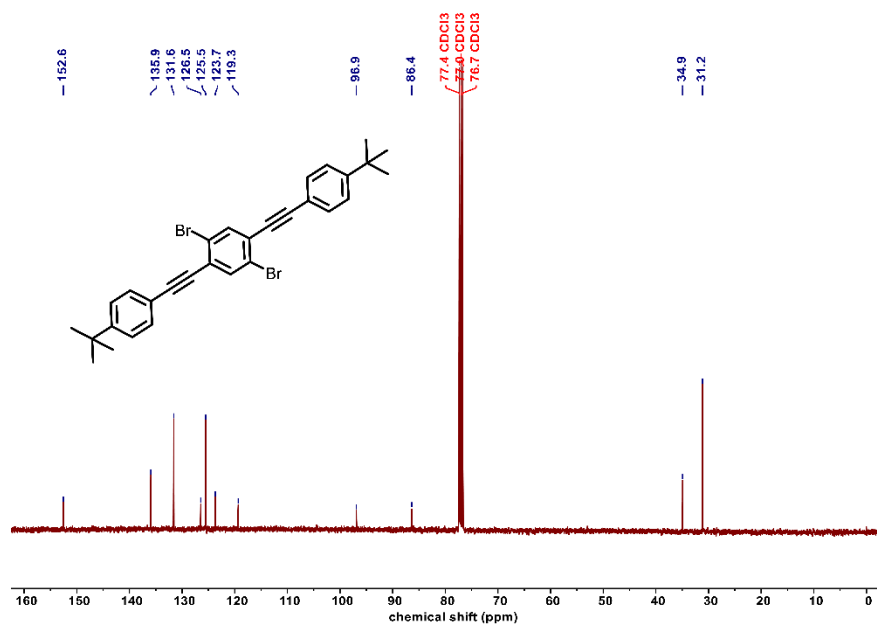

Figure S41  $^{13}\text{C}$  NMR spectrum of compound **5** (101 MHz,  $\text{CDCl}_3$ , 298 K)

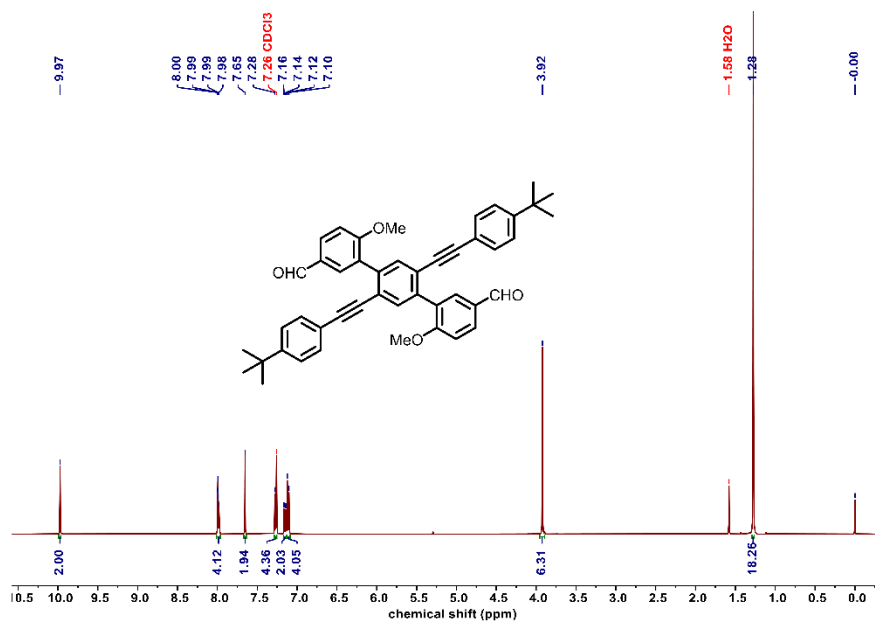

Figure S42 <sup>1</sup>H NMR spectrum of compound 6 (400 MHz, CDCl<sub>3</sub>, 298 K)

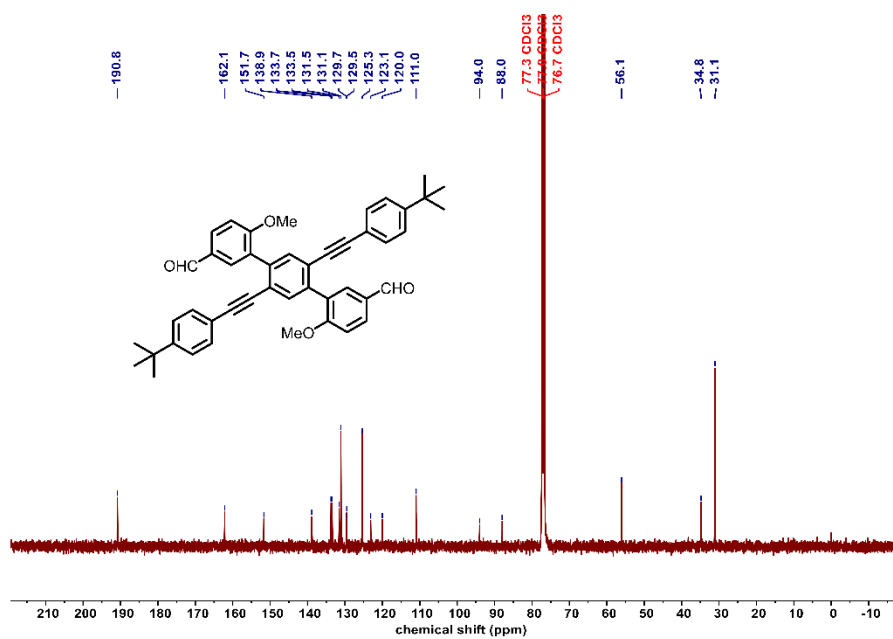

Figure S43 <sup>13</sup>C NMR spectrum of compound 6 (101 MHz, CDCl<sub>3</sub>, 298 K)

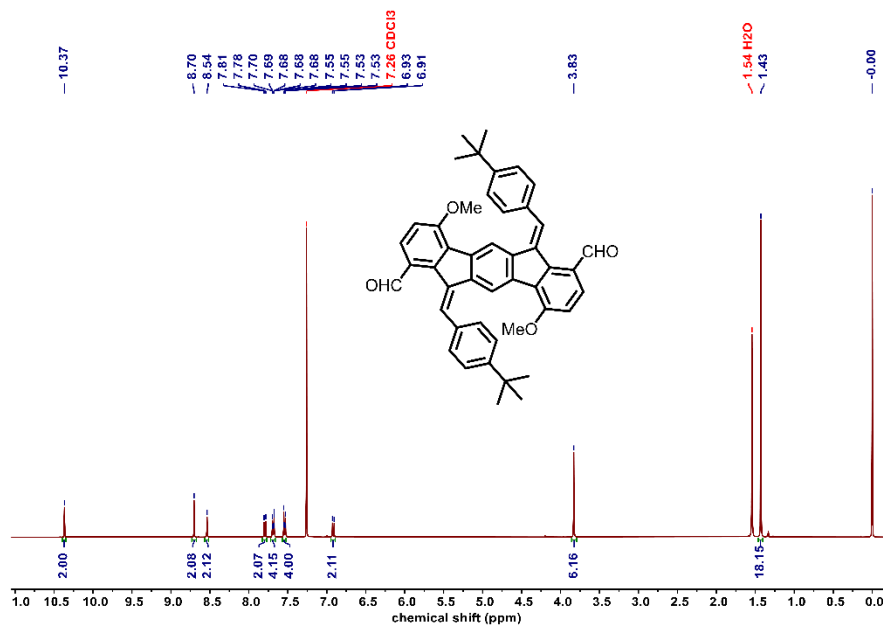

Figure S44  $^1\text{H}$  NMR spectrum of compound 7 (400 MHz,  $\text{CDCl}_3$ , 298 K)

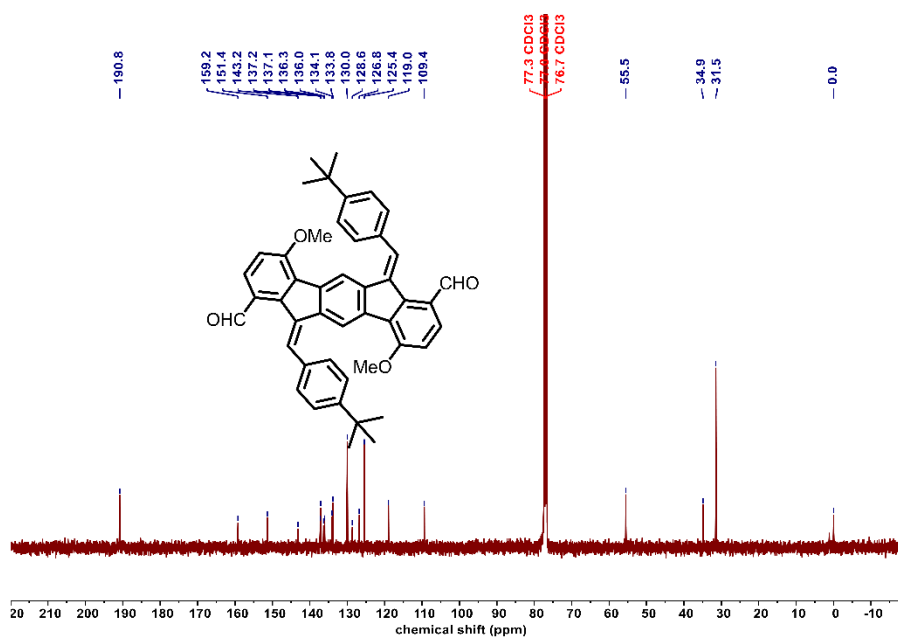

Figure S45  $^{13}\text{C}$  NMR spectrum of compound 7 (101 MHz,  $\text{CDCl}_3$ , 298 K)

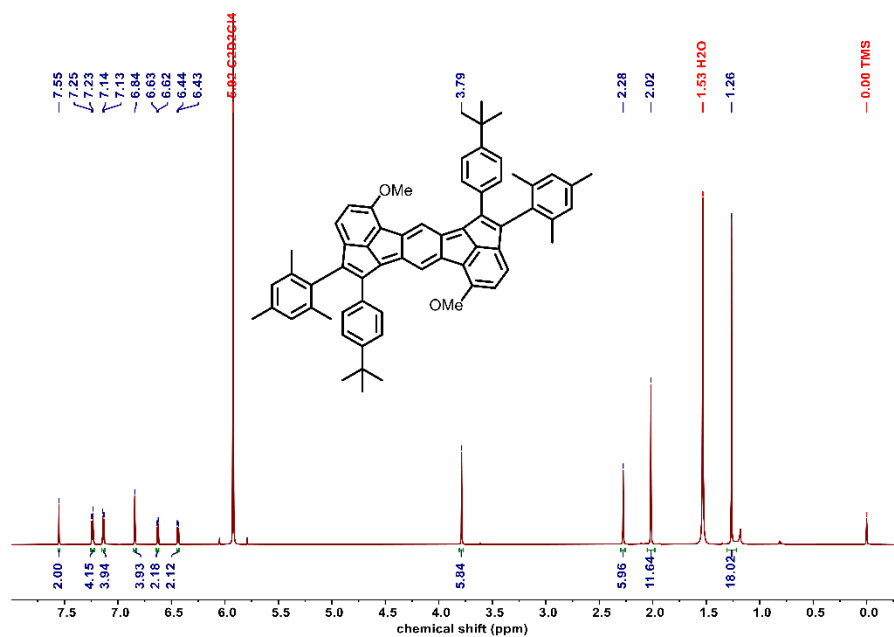

Figure S46  $^1\text{H}$  NMR spectrum of compound **1** (700 MHz,  $\text{C}_2\text{D}_2\text{Cl}_4$ , 298 K)

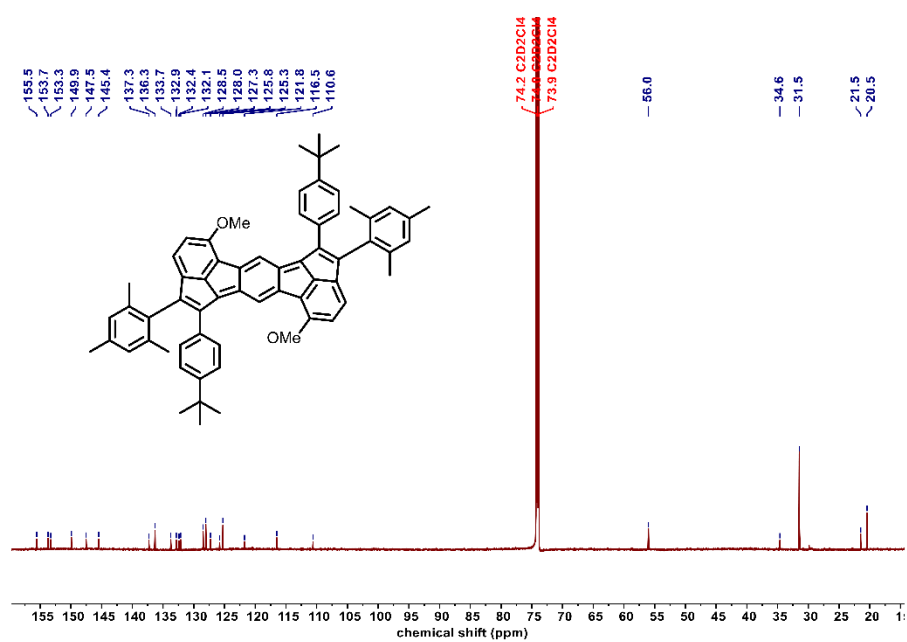

Figure S47  $^{13}\text{C}$  NMR spectrum of compound **1** (176 MHz,  $\text{CDCl}_3$ , 298 K)

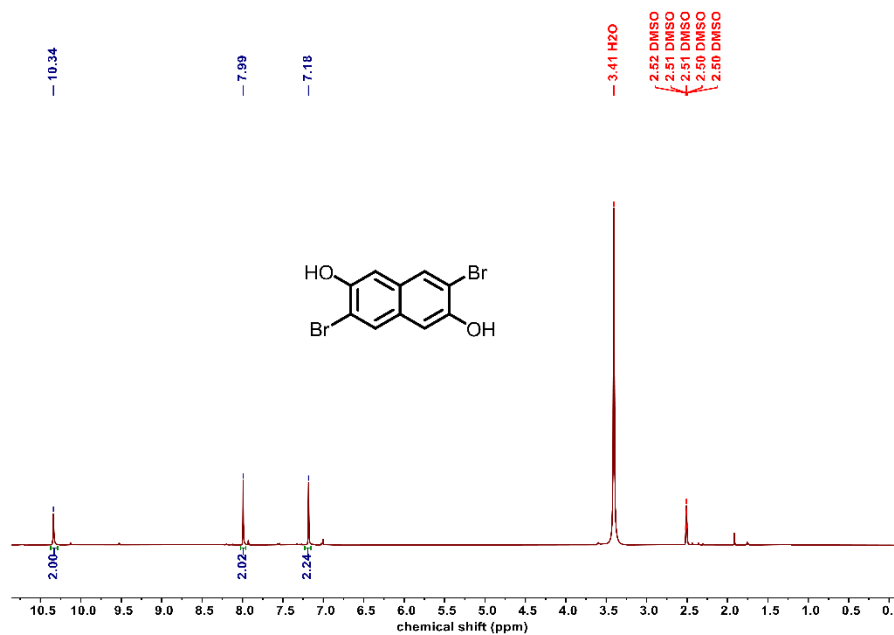

**Figure S48**  $^1\text{H}$  NMR spectrum of compound **Na-2Br-2OH** (400 MHz,  $\text{DMSO-}d_6$ , 298 K)

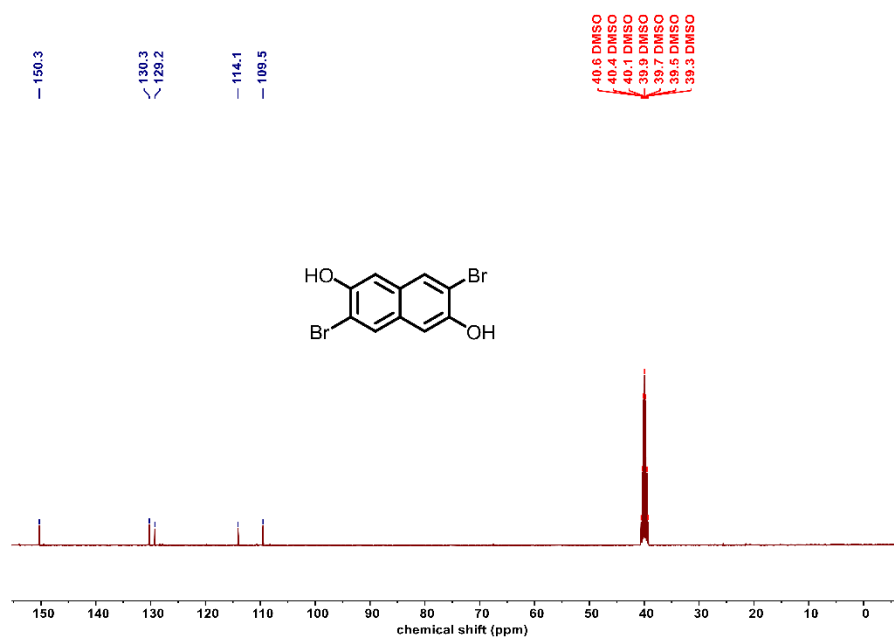

**Figure S49**  $^{13}\text{C}$  NMR spectrum of compound **Na-2Br-2OH** (101 MHz,  $\text{DMSO-}d_6$ , 298 K)

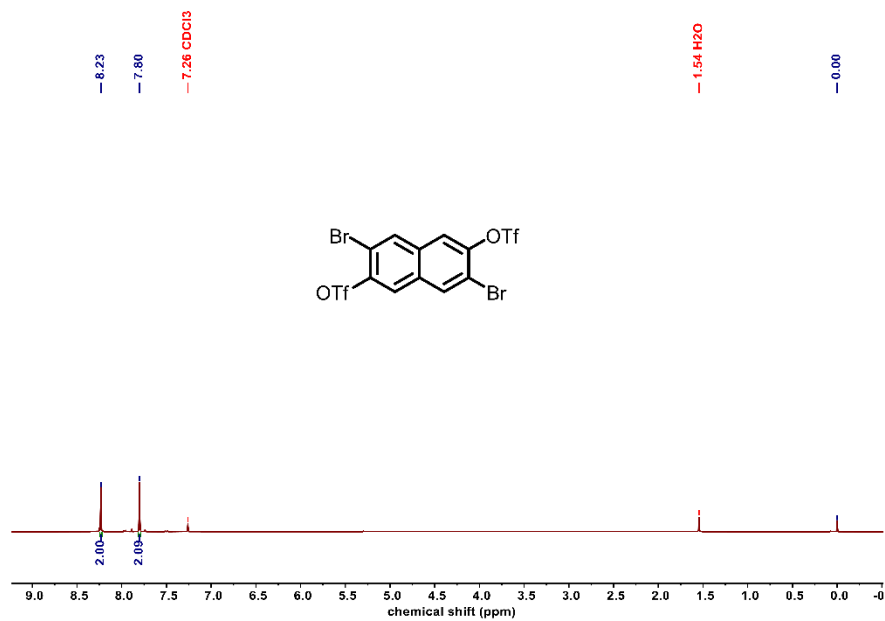

**Figure S50** <sup>1</sup>H NMR spectrum of compound **10** (400 MHz, CDCl<sub>3</sub>, 298 K)

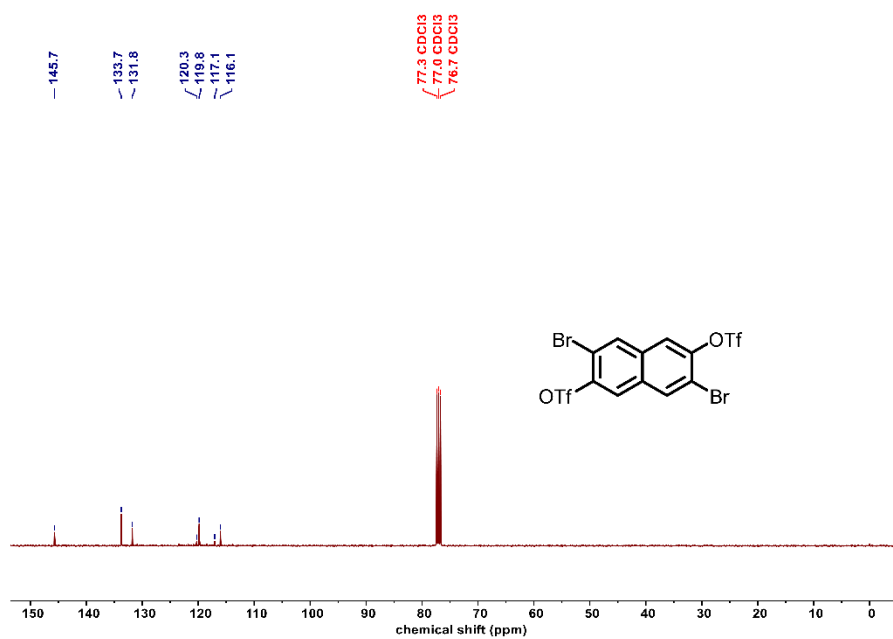

**Figure S51** <sup>13</sup>C NMR spectrum of compound **10** (101 MHz, CDCl<sub>3</sub>, 298 K)

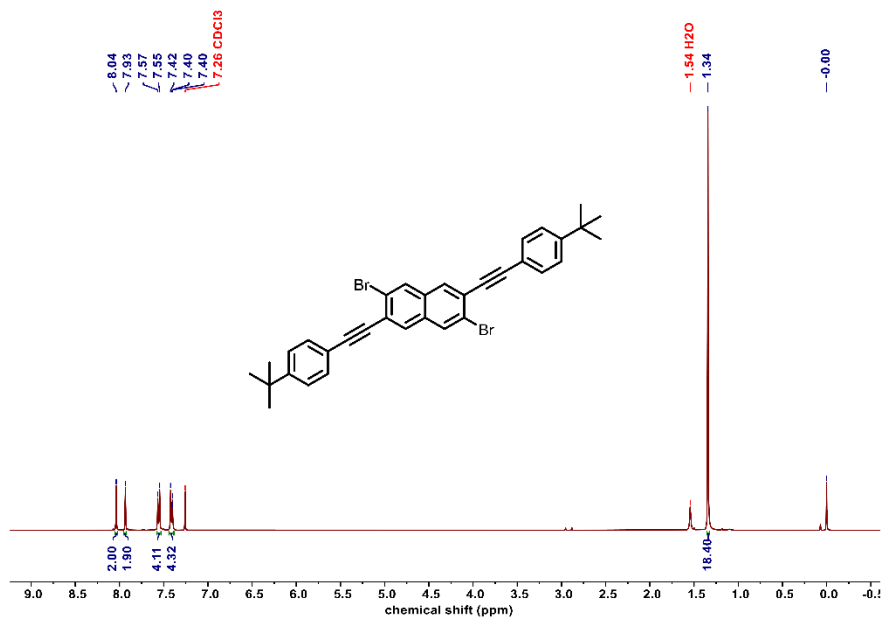

Figure S52 <sup>1</sup>H NMR spectrum of compound 11 (400 MHz, CDCl<sub>3</sub>, 298 K)

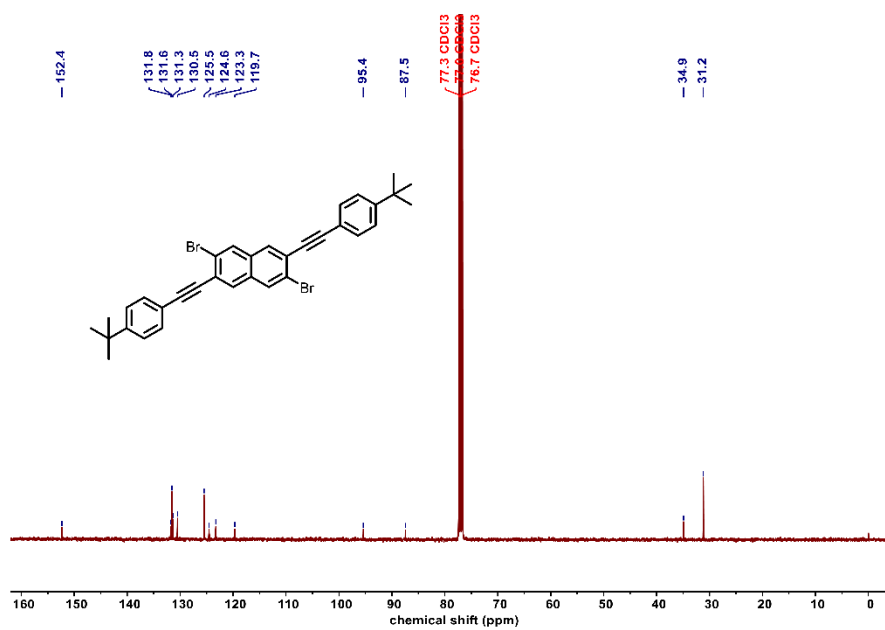

Figure S53 <sup>13</sup>C NMR spectrum of compound 11 (101 MHz, CDCl<sub>3</sub>, 298 K)

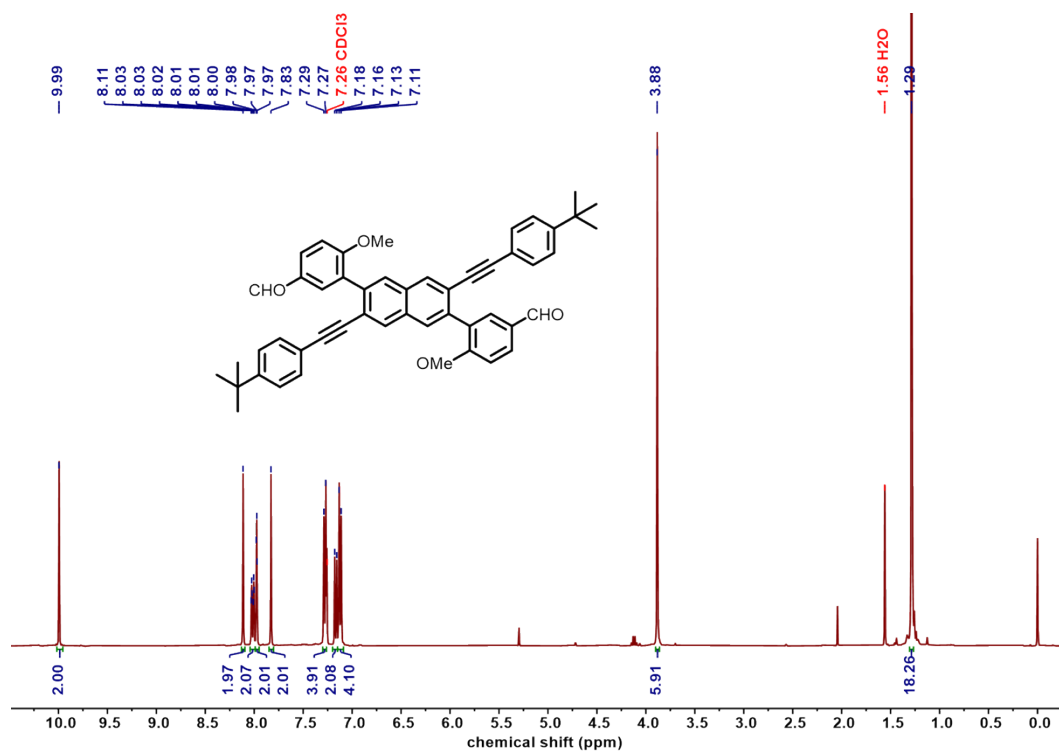

Figure S54 <sup>1</sup>H NMR spectrum of compound **12** (400 MHz, CDCl<sub>3</sub>, 298 K)

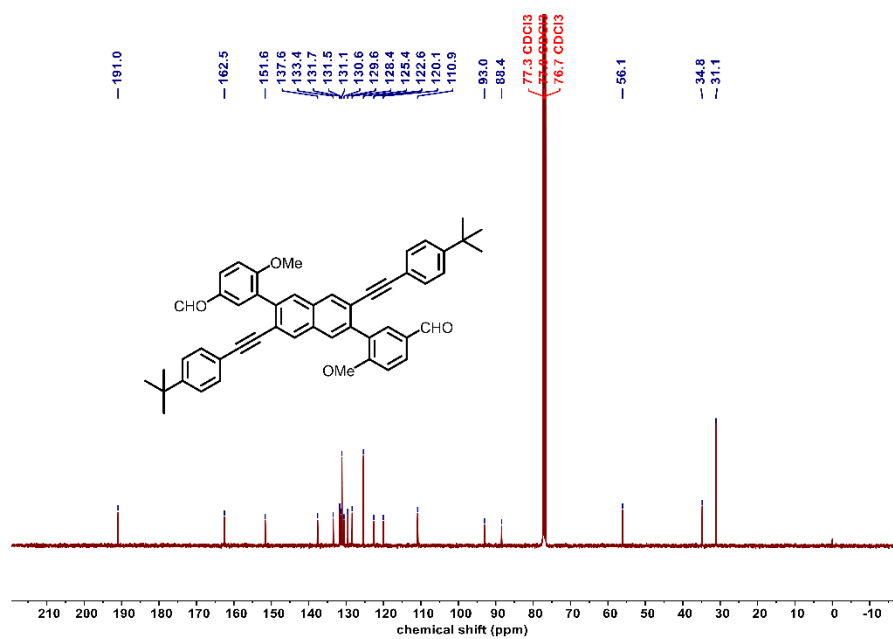

Figure S55 <sup>13</sup>C NMR spectrum of compound **12** (101 MHz, CDCl<sub>3</sub>, 298 K)



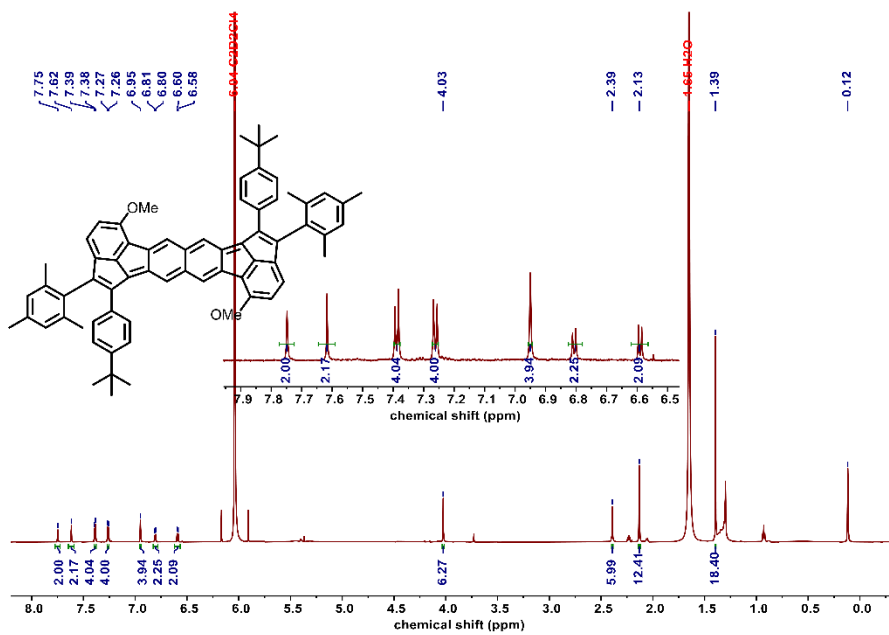

Figure S58 <sup>1</sup>H NMR spectrum of compound **2** (700 MHz, C<sub>2</sub>D<sub>2</sub>Cl<sub>4</sub>, 298 K)

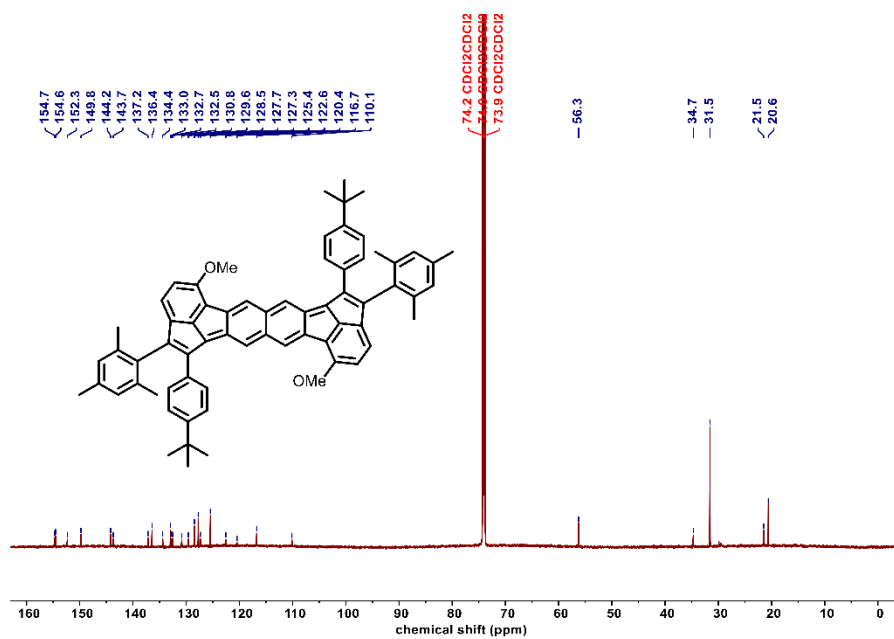

Figure S59 <sup>13</sup>C NMR spectrum of compound **2** (176 MHz, C<sub>2</sub>D<sub>2</sub>Cl<sub>4</sub>, 298 K)

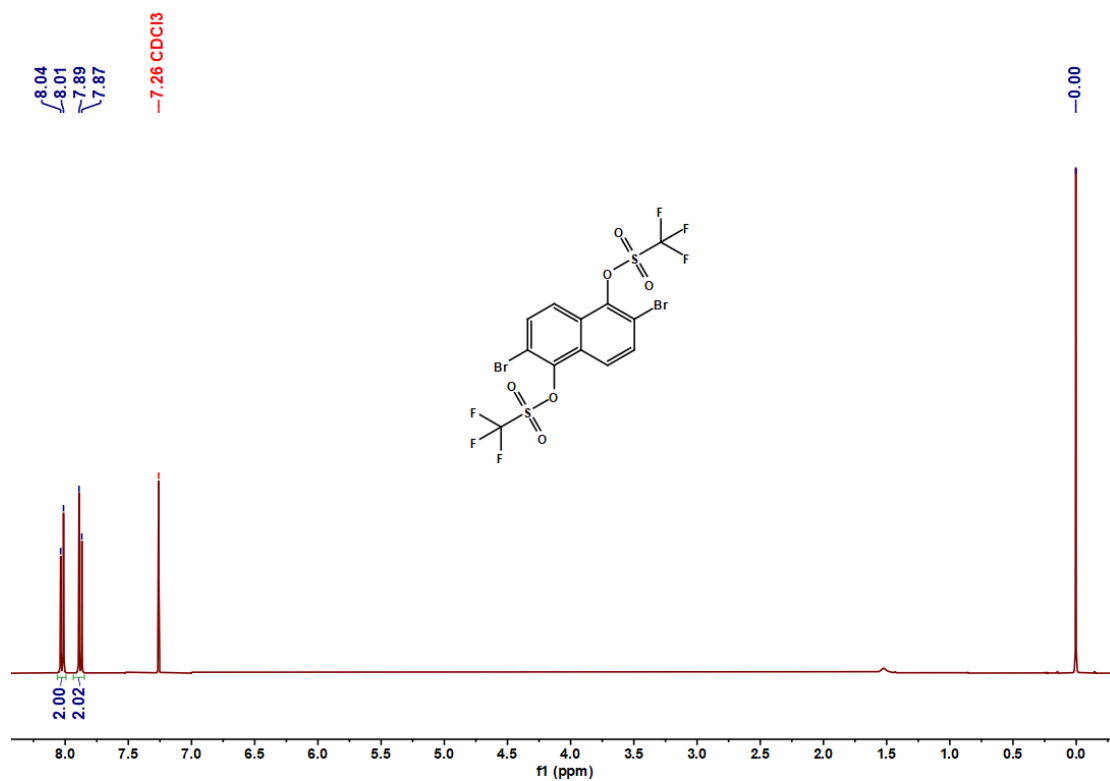

Figure S60 <sup>1</sup>H NMR spectrum of compound 16 (400 MHz, CDCl<sub>3</sub>, 298 K)

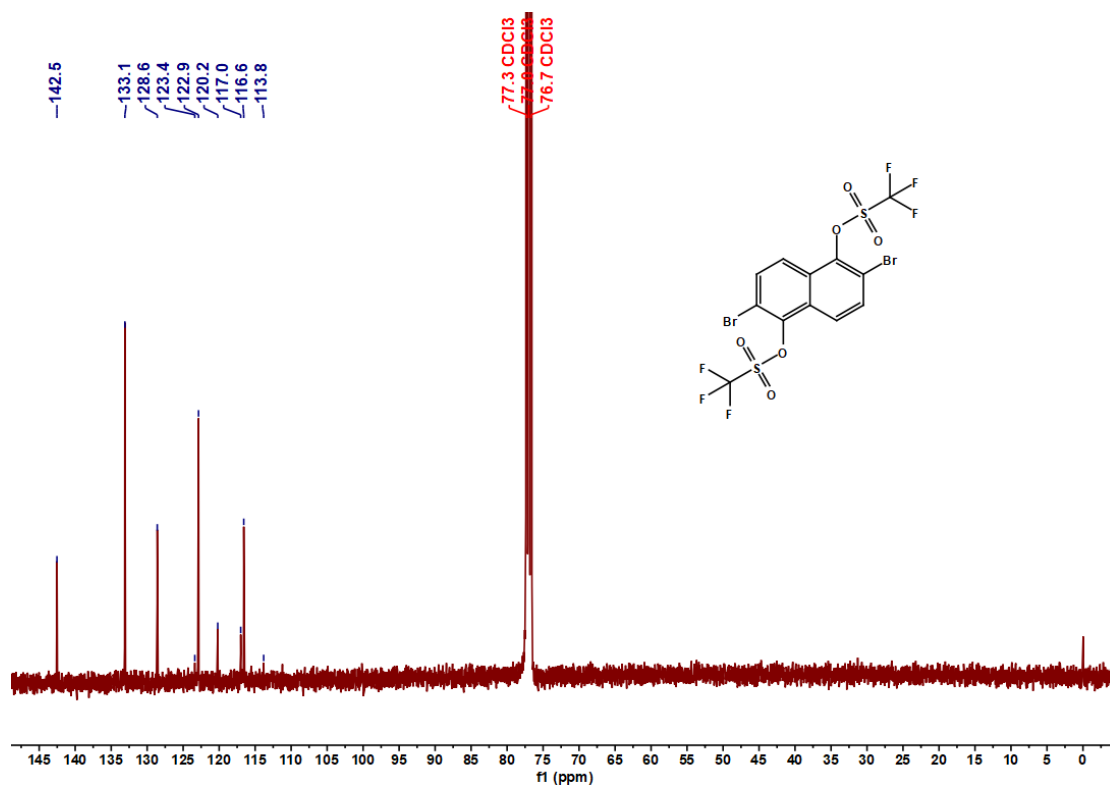

Figure S61 <sup>13</sup>C NMR spectrum of compound 16 (101 MHz, CDCl<sub>3</sub>, 298 K)

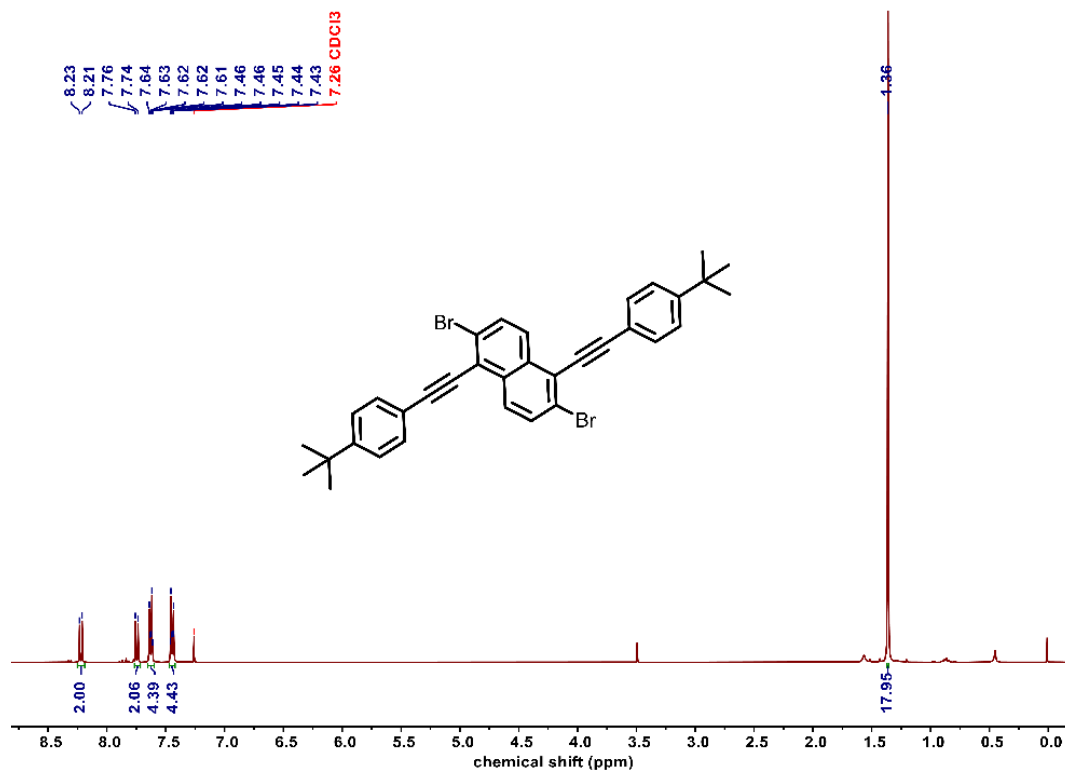

Figure S62 <sup>1</sup>H NMR spectrum of compound 17 (400 MHz, CDCl<sub>3</sub>, 298 K)

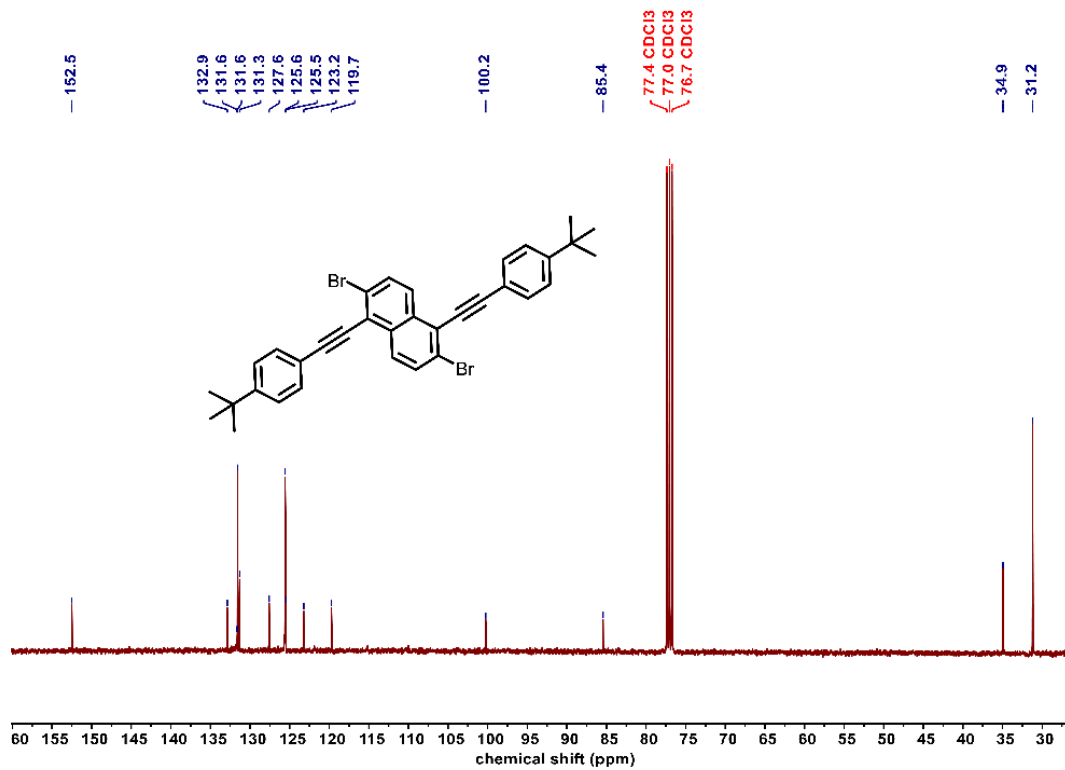

Figure S63 <sup>13</sup>C NMR spectrum of compound 17 (101 MHz, CDCl<sub>3</sub>, 298 K)

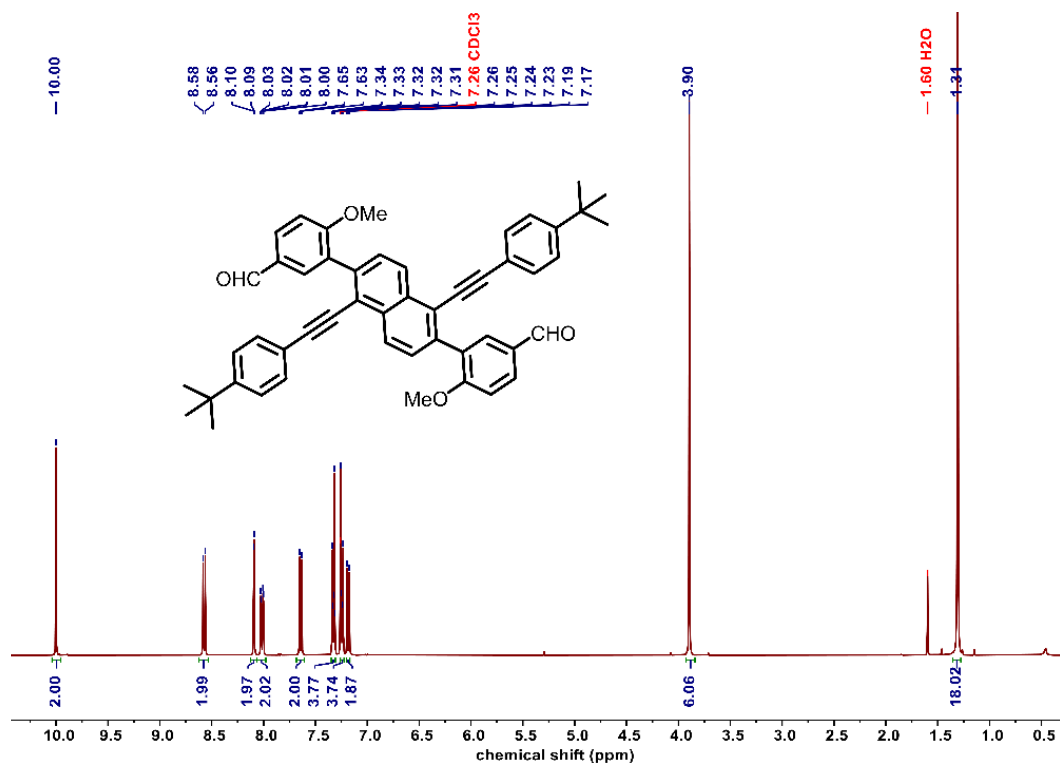

**Figure S64** <sup>1</sup>H NMR spectrum of compound **18** (400 MHz, CDCl<sub>3</sub>, 298 K)

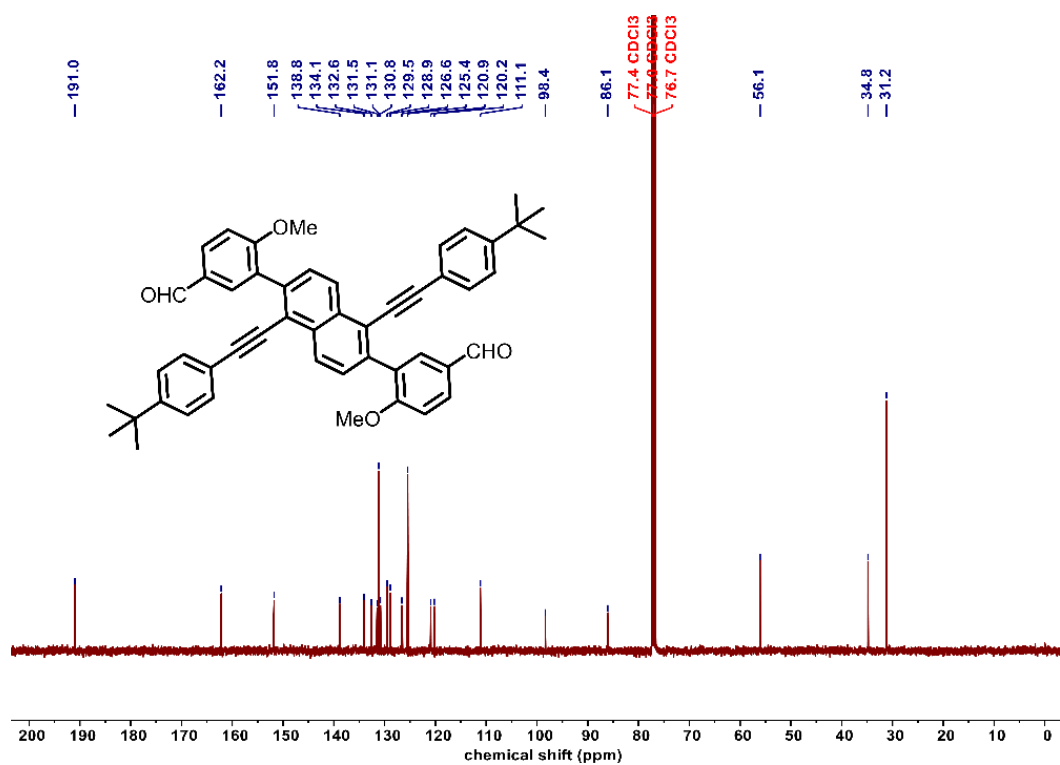

**Figure S65** <sup>13</sup>C NMR spectrum of compound **18** (101 MHz, CDCl<sub>3</sub>, 298 K)

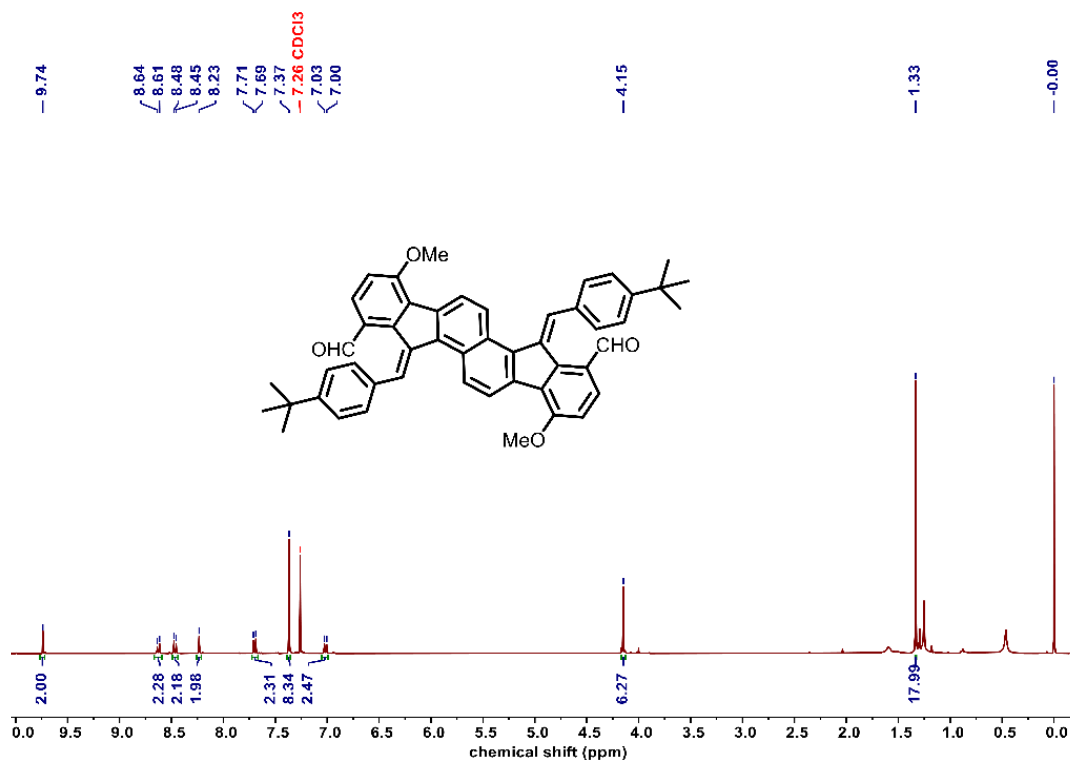

Figure S66 <sup>1</sup>H NMR spectrum of compound 19 (400 MHz, CDCl<sub>3</sub>, 298 K)

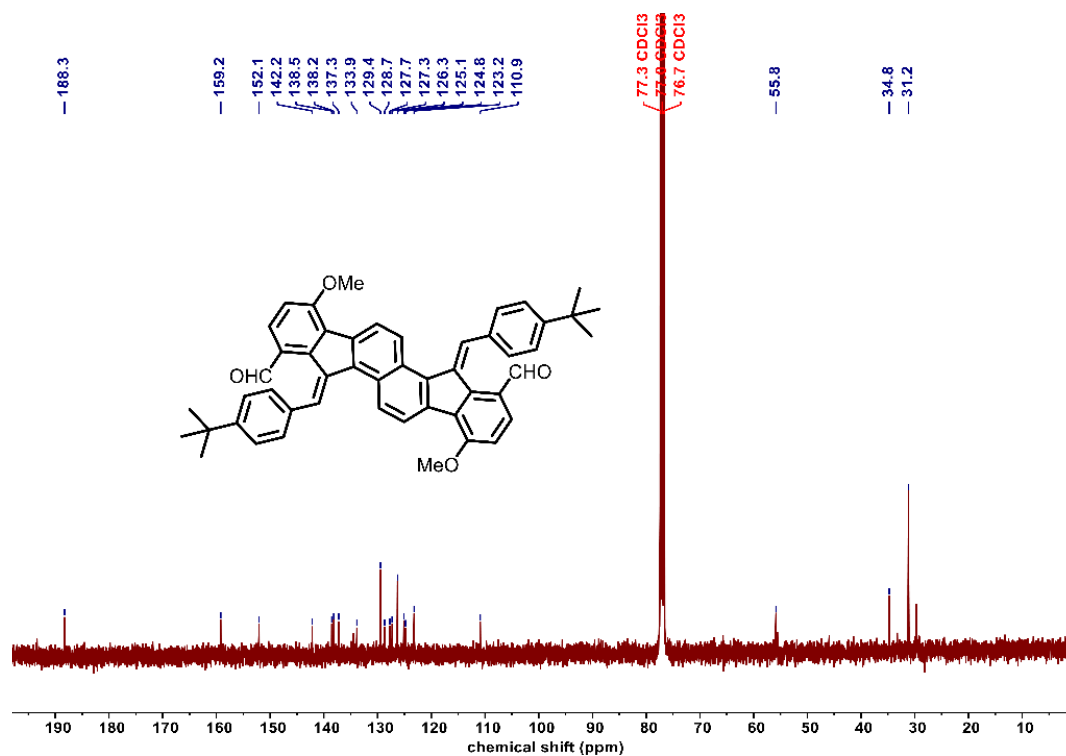

Figure S67 <sup>13</sup>C NMR spectrum of compound 19 (101 MHz, CDCl<sub>3</sub>, 298 K)

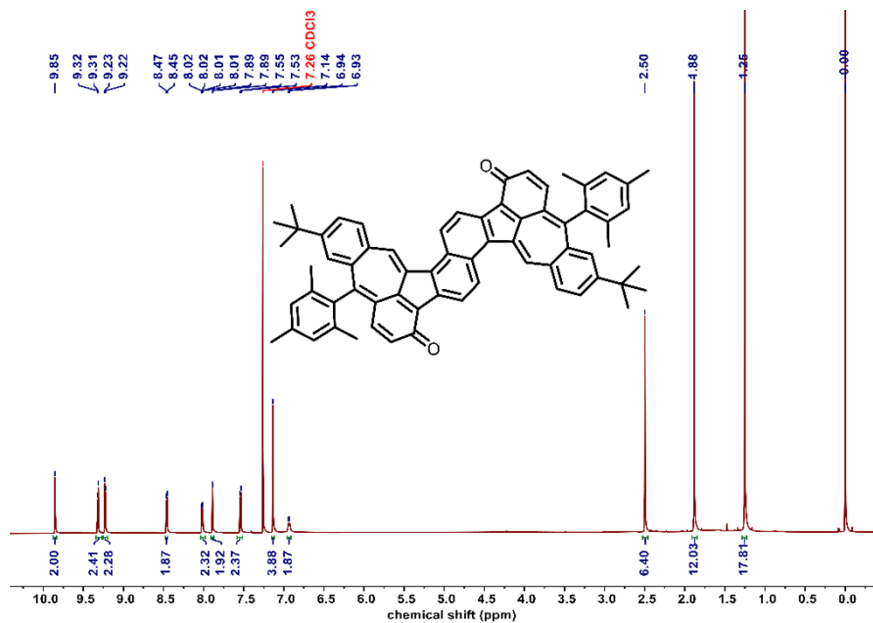

Figure S68  $^1\text{H}$  NMR spectrum of compound 3 (400 MHz,  $\text{CDCl}_3$ , 298 K)

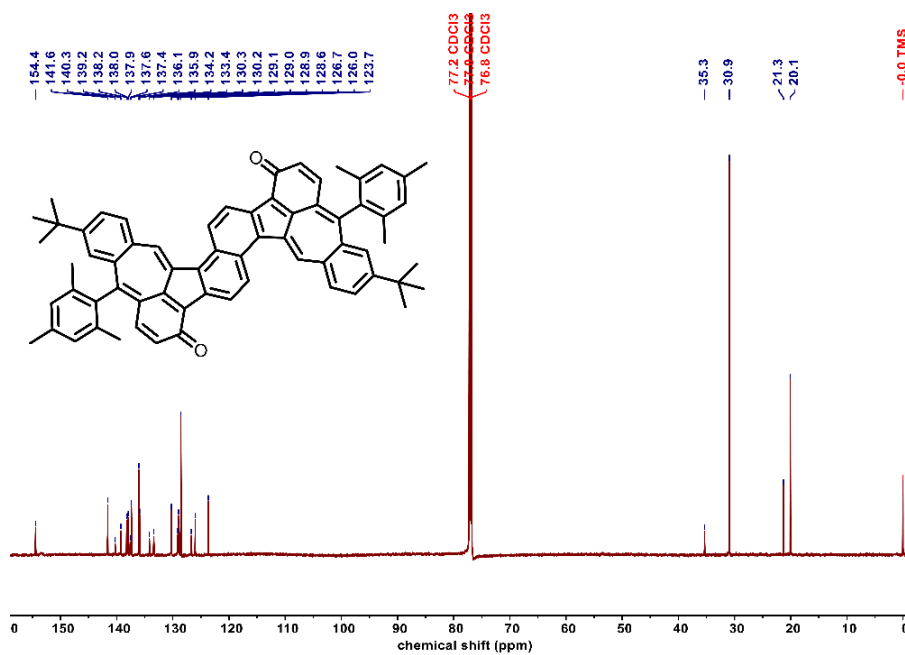

Figure S69  $^{13}\text{C}$  NMR spectrum of compound 3 (101 MHz,  $\text{CDCl}_3$ , 298 K)

## 16. HRMS spectra

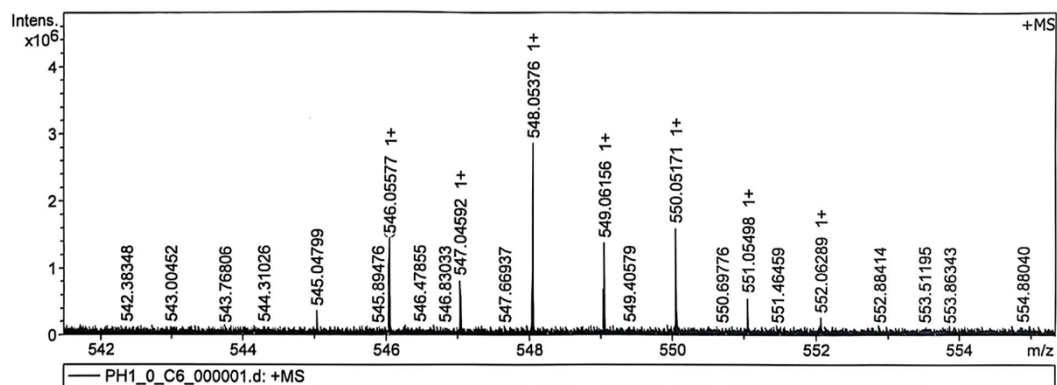

| Meas. m/z  | # | Ion Formula | Score  | m/z        | err [ppm] | Mean err [ppm] | mSigma | rdb  | e <sup>-</sup> Conf | N-Rule |
|------------|---|-------------|--------|------------|-----------|----------------|--------|------|---------------------|--------|
| 546.055769 | 1 | C30H28Br2   | 100.00 | 546.055227 | -1.0      | -0.5           | 25.0   | 16.0 | odd                 | ok     |

Figure S70 HRMS spectrum of compound 5

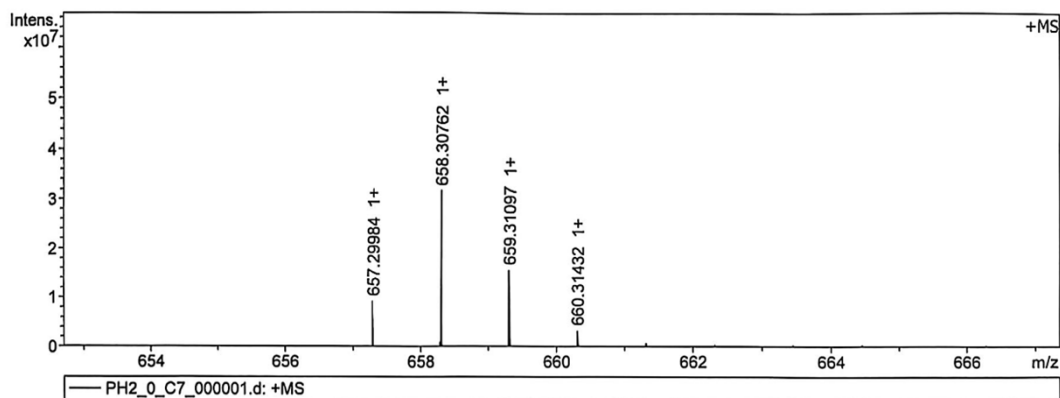

| Meas. m/z  | # | Ion Formula | Score  | m/z        | err [ppm] | Mean err [ppm] | mSigma | rdb  | e <sup>-</sup> Conf | N-Rule |
|------------|---|-------------|--------|------------|-----------|----------------|--------|------|---------------------|--------|
| 658.307623 | 1 | C46H42O4    | 100.00 | 658.307761 | -0.2      | 0.2            | 16.8   | 26.0 | odd                 | ok     |

Figure S71 HRMS spectrum of compound 6

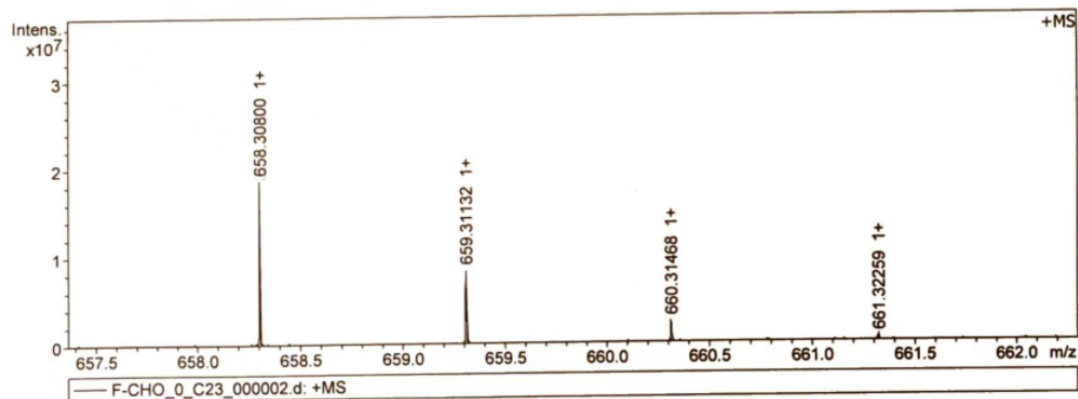

| Meas. m/z  | # | Ion Formula | Score  | m/z        | err [ppm] | Mean err [ppm] | mSigma | rdb  | e <sup>-</sup> Conf | N-Rule |
|------------|---|-------------|--------|------------|-----------|----------------|--------|------|---------------------|--------|
| 658.308004 | 1 | C46H42O4    | 100.00 | 658.307761 | 0.4       | -0.3           | 31.1   | 26.0 | odd                 | ok     |

Figure S72 HRMS spectrum of compound 7

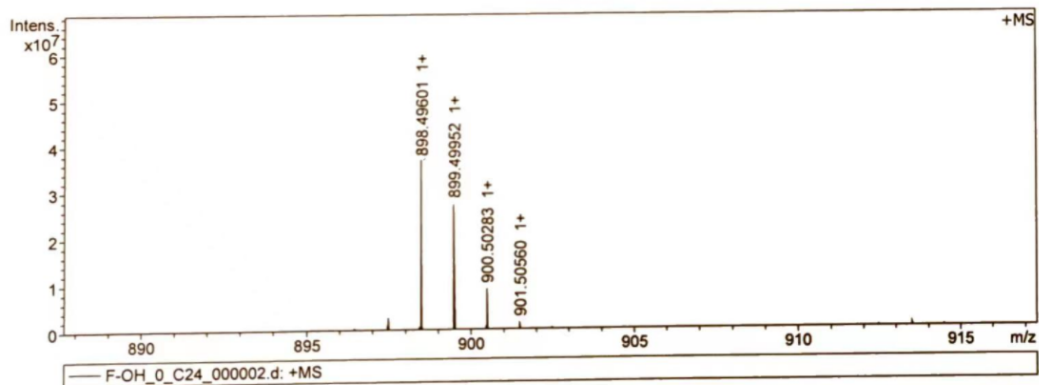

| Meas. m/z  | # | Ion Formula                                    | Score  | m/z        | err [ppm] | Mean err [ppm] | mSigma | rdb  | e <sup>-</sup> Conf | N-Rule |
|------------|---|------------------------------------------------|--------|------------|-----------|----------------|--------|------|---------------------|--------|
| 898.496008 | 1 | C <sub>64</sub> H <sub>66</sub> O <sub>4</sub> | 100.00 | 898.495562 | -0.5      | -0.6           | 22.6   | 32.0 | odd                 | ok     |

Figure S73 HRMS spectrum of compound 8

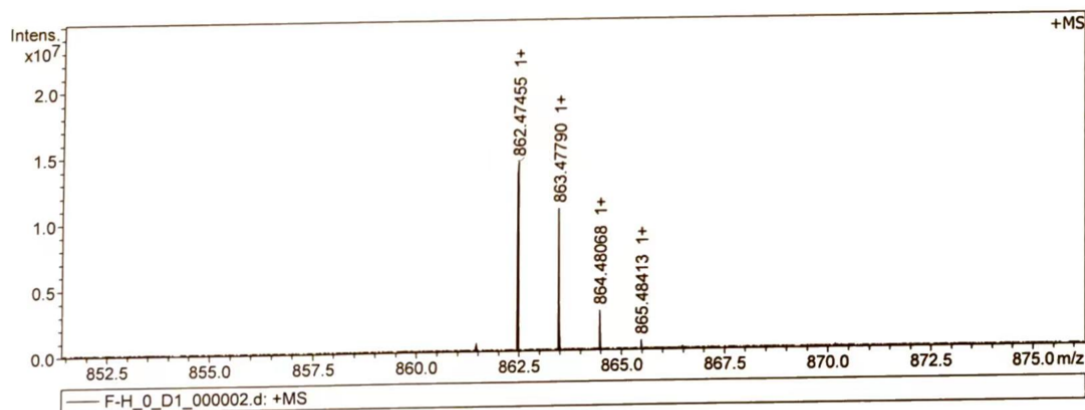

| Meas. m/z  | # | Ion Formula                                    | Score  | m/z        | err [ppm] | Mean err [ppm] | mSigma | rdb  | e <sup>-</sup> Conf | N-Rule |
|------------|---|------------------------------------------------|--------|------------|-----------|----------------|--------|------|---------------------|--------|
| 862.474553 | 1 | C <sub>64</sub> H <sub>62</sub> O <sub>2</sub> | 100.00 | 862.474433 | 0.1       | -0.0           | 28.1   | 34.0 | odd                 | ok     |

Figure S74 HRMS spectrum of compound 9

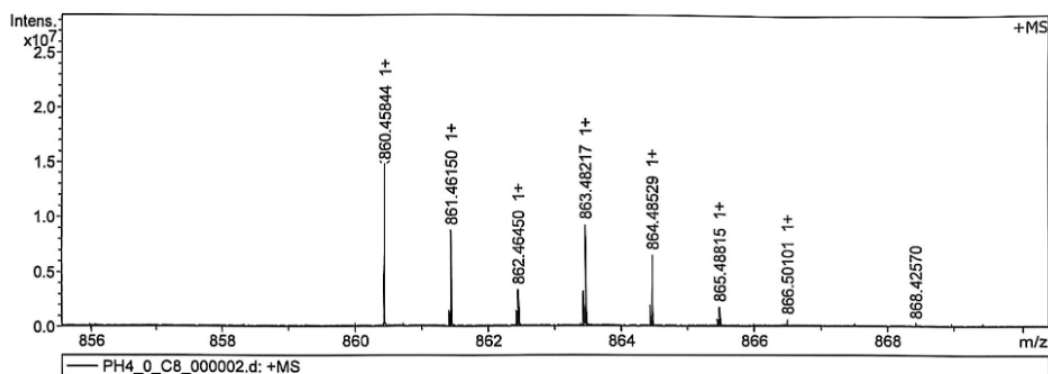

| Meas. m/z  | # | Ion Formula                                    | Score  | m/z        | err [ppm] | Mean err [ppm] | mSigma | rdb  | e <sup>-</sup> Conf | N-Rule |
|------------|---|------------------------------------------------|--------|------------|-----------|----------------|--------|------|---------------------|--------|
| 860.458436 | 1 | C <sub>64</sub> H <sub>60</sub> O <sub>2</sub> | 100.00 | 860.458783 | -0.4      | 0.6            | 46.6   | 35.0 | odd                 | ok     |

Figure S75 HRMS spectrum of compound 1

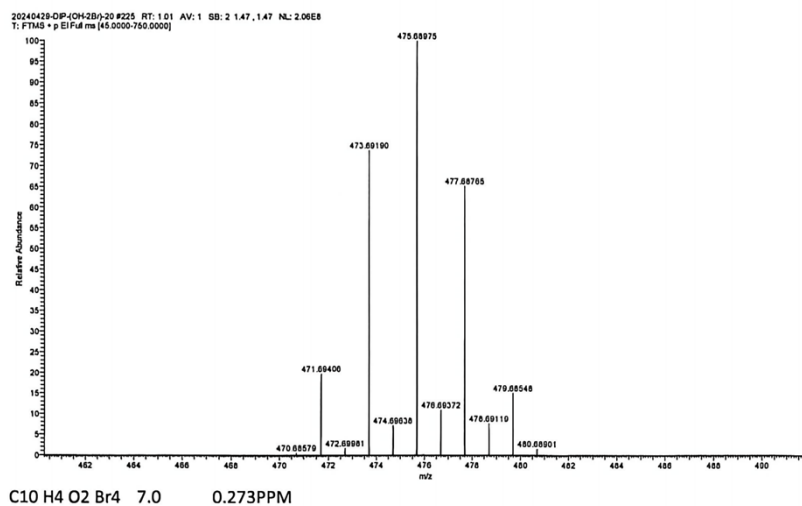

Figure S76 HRMS spectrum of compound Na-4Br-2OH

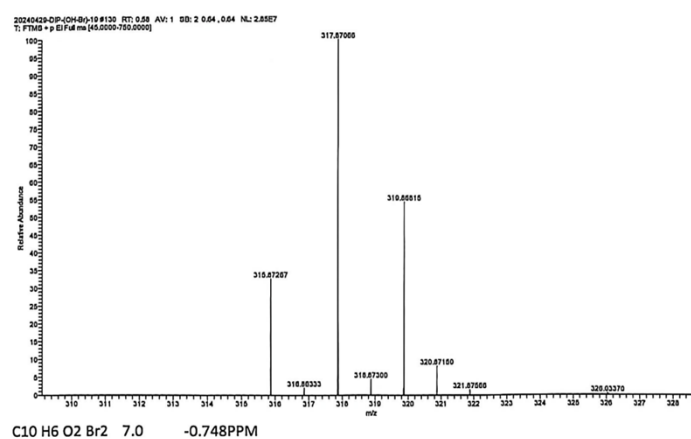

Figure S77 HRMS spectrum of compound Na-2Br-2OH

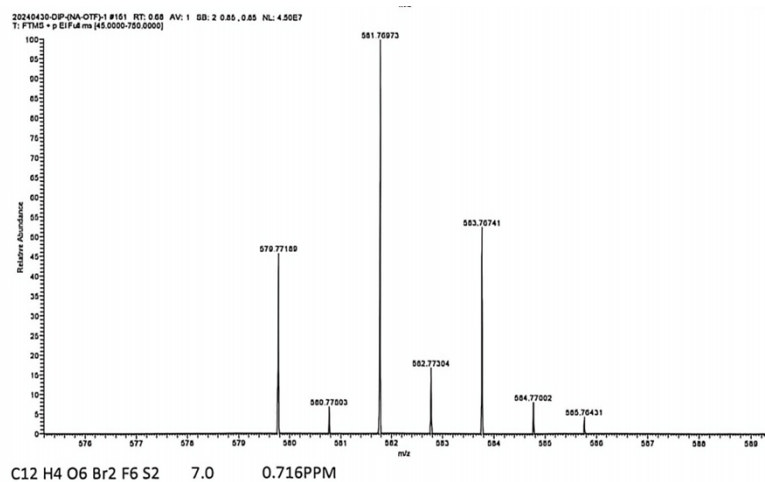

Figure S78 HRMS spectrum of compound 10

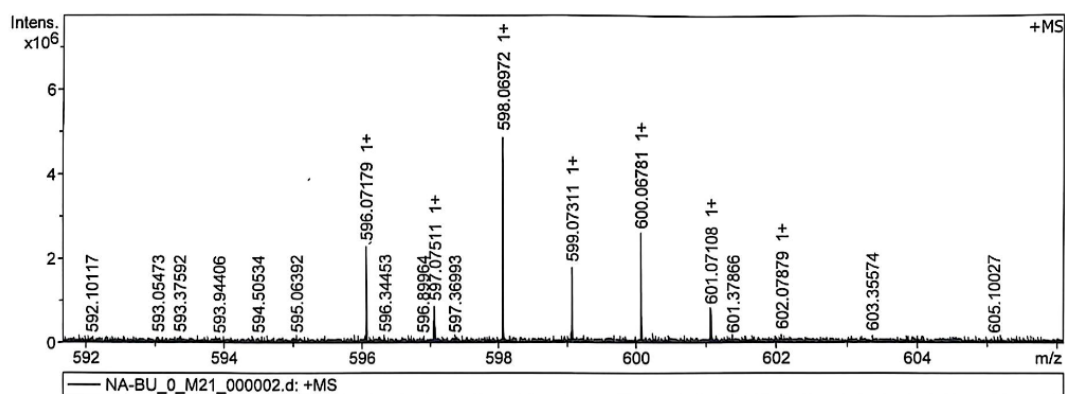

| Meas. m/z  | # | Ion Formula | Score  | m/z        | err [ppm] | Mean err [ppm] | mSigma | rdb  | e <sup>-</sup> Conf | N-Rule |
|------------|---|-------------|--------|------------|-----------|----------------|--------|------|---------------------|--------|
| 596.071786 | 1 | C34H30Br2   | 100.00 | 596.070877 | -1.5      | -0.9           | 11.8   | 19.0 | odd                 | ok     |

Figure S79 HRMS spectrum of compound 11

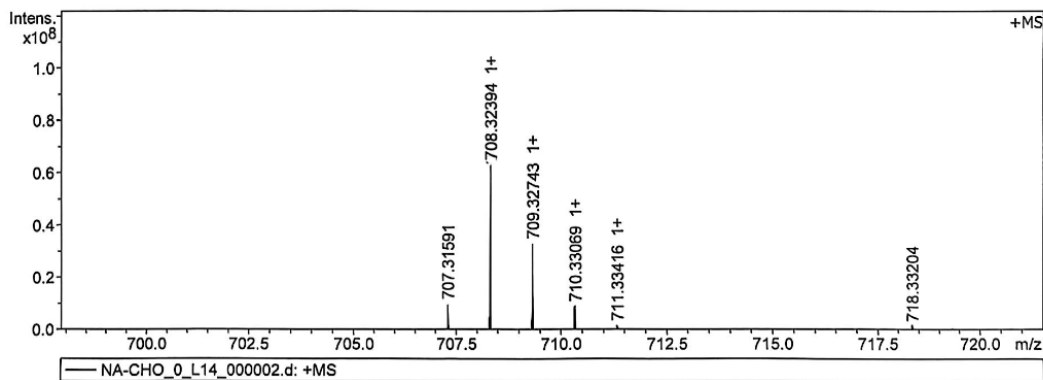

| Meas. m/z  | # | Ion Formula                                    | Score  | m/z        | err [ppm] | Mean err [ppm] | mSigma | rdb  | e <sup>-</sup> Conf | N-Rule |
|------------|---|------------------------------------------------|--------|------------|-----------|----------------|--------|------|---------------------|--------|
| 708.323937 | 1 | C <sub>50</sub> H <sub>44</sub> O <sub>4</sub> | 100.00 | 708.323411 | 0.7       | -0.8           | 15.2   | 29.0 | odd                 | ok     |

Figure S80 HRMS spectrum of compound 12

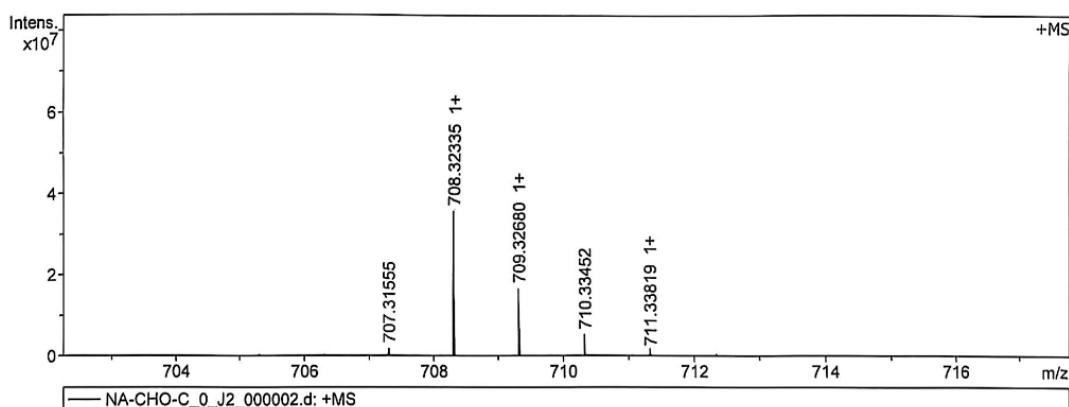

| Meas. m/z  | # | Ion Formula                                    | Score  | m/z        | err [ppm] | Mean err [ppm] | mSigma | rdb  | e <sup>-</sup> Conf | N-Rule |
|------------|---|------------------------------------------------|--------|------------|-----------|----------------|--------|------|---------------------|--------|
| 708.323350 | 1 | C <sub>50</sub> H <sub>44</sub> O <sub>4</sub> | 100.00 | 708.323411 | -0.1      | 0.0            | 42.4   | 29.0 | odd                 | ok     |

Figure S81 HRMS spectrum of compound 13

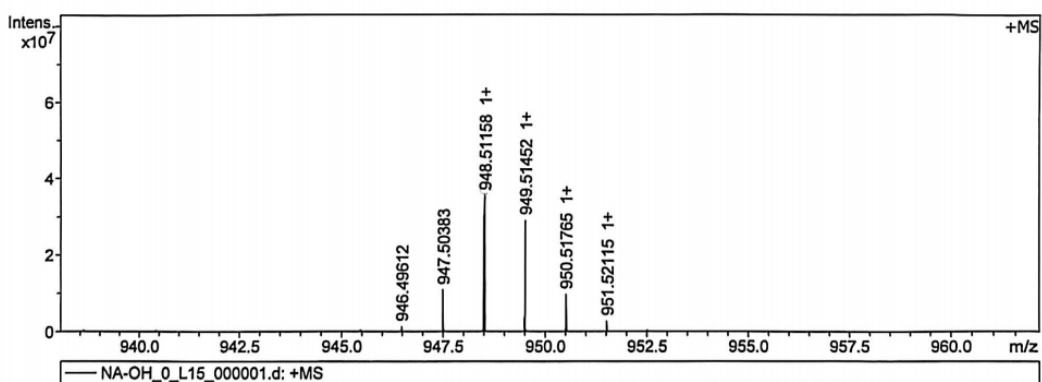

| Meas. m/z  | # | Ion Formula                                    | Score  | m/z        | err [ppm] | Mean err [ppm] | mSigma | rdb  | e <sup>-</sup> Conf | N-Rule |
|------------|---|------------------------------------------------|--------|------------|-----------|----------------|--------|------|---------------------|--------|
| 948.511578 | 1 | C <sub>68</sub> H <sub>68</sub> O <sub>4</sub> | 100.00 | 948.511212 | -0.4      | -0.1           | 33.9   | 35.0 | odd                 | ok     |

Figure S82 HRMS spectrum of compound 14

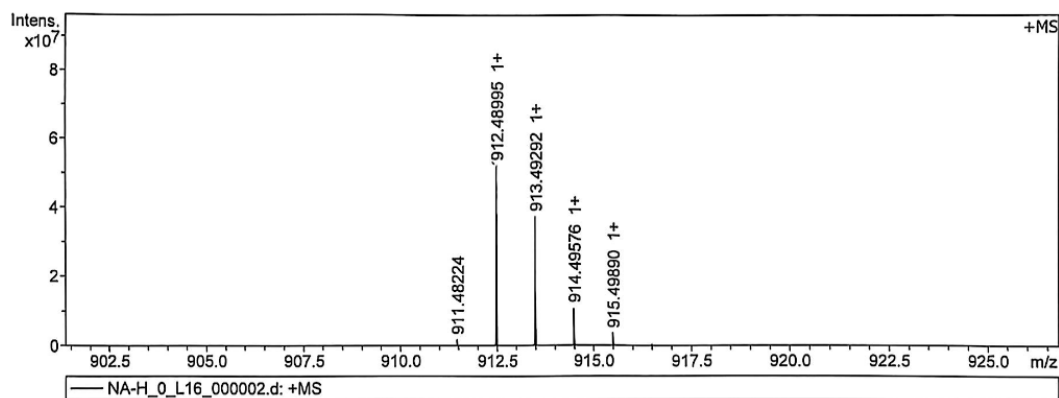

| Meas. m/z  | # | Ion Formula                                    | Score  | m/z        | err [ppm] | Mean err [ppm] | mSigma | rdb  | e <sup>-</sup> Conf | N-Rule |
|------------|---|------------------------------------------------|--------|------------|-----------|----------------|--------|------|---------------------|--------|
| 912.489955 | 1 | C <sub>68</sub> H <sub>64</sub> O <sub>2</sub> | 100.00 | 912.490083 | -0.1      | 0.5            | 32.7   | 37.0 | odd                 | ok     |

Figure S83 HRMS spectrum of compound 15

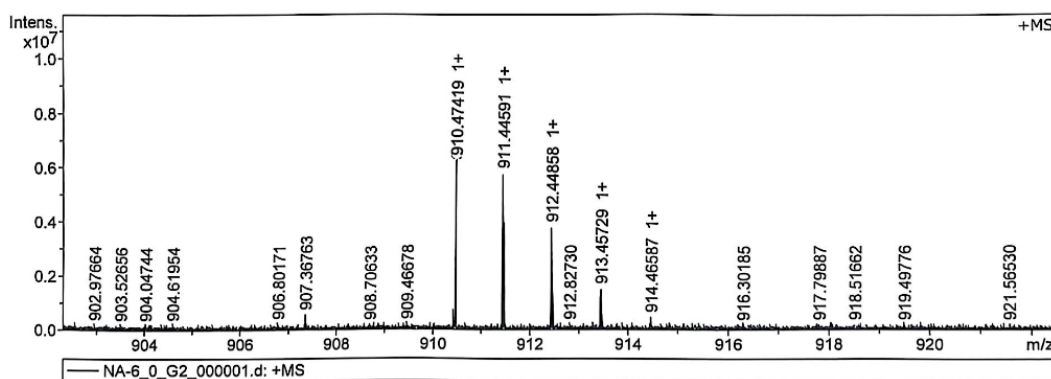

| Meas. m/z  | # | Ion Formula                                    | Score  | m/z        | err [ppm] | Mean err [ppm] | mSigma | rdb  | e <sup>-</sup> Conf | N-Rule |
|------------|---|------------------------------------------------|--------|------------|-----------|----------------|--------|------|---------------------|--------|
| 910.474189 | 1 | C <sub>68</sub> H <sub>62</sub> O <sub>2</sub> | 100.00 | 910.474433 | -0.3      | 0.6            | 68.5   | 38.0 | odd                 | ok     |

Figure S84 HRMS spectrum of compound 2

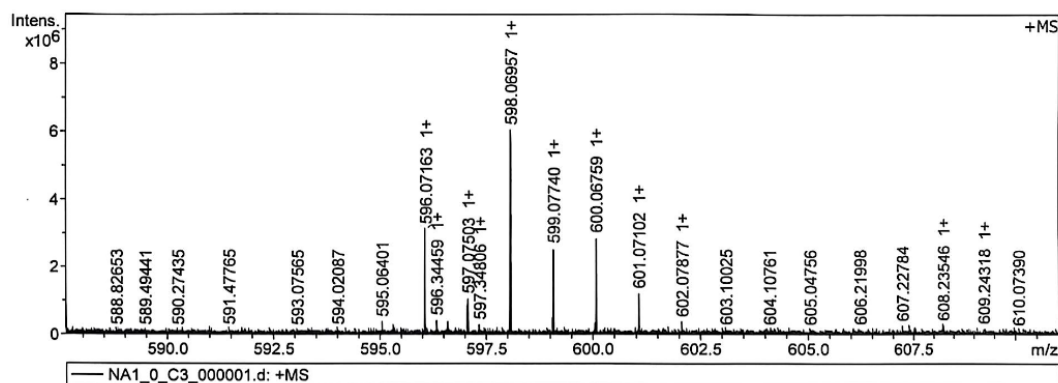

| Meas. m/z  | # | Ion Formula                                     | Score  | m/z        | err [ppm] | Mean err [ppm] | mSigma | rdb  | e <sup>-</sup> Conf | N-Rule |
|------------|---|-------------------------------------------------|--------|------------|-----------|----------------|--------|------|---------------------|--------|
| 596.071627 | 1 | C <sub>34</sub> H <sub>30</sub> Br <sub>2</sub> | 100.00 | 596.070877 | 1.3       | -0.7           | 26.9   | 19.0 | odd                 | ok     |

Figure S85 HRMS spectrum of compound 17

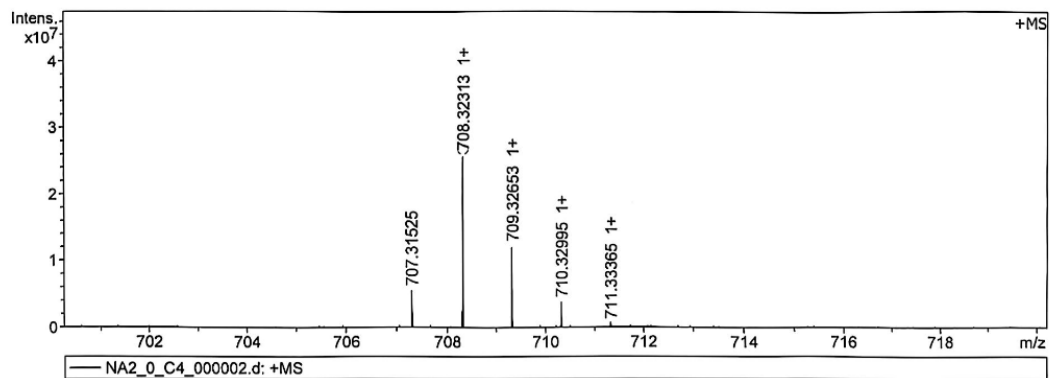

| Meas. m/z  | # | Ion Formula                                    | Score  | m/z        | err [ppm] | Mean err [ppm] | mSigma | rdb  | e <sup>-</sup> Conf | N-Rule |
|------------|---|------------------------------------------------|--------|------------|-----------|----------------|--------|------|---------------------|--------|
| 708.323135 | 1 | C <sub>50</sub> H <sub>44</sub> O <sub>4</sub> | 100.00 | 708.323411 | -0.4      | 0.4            | 31.7   | 29.0 | odd                 | ok     |

Figure S86 HRMS spectrum of compound 18

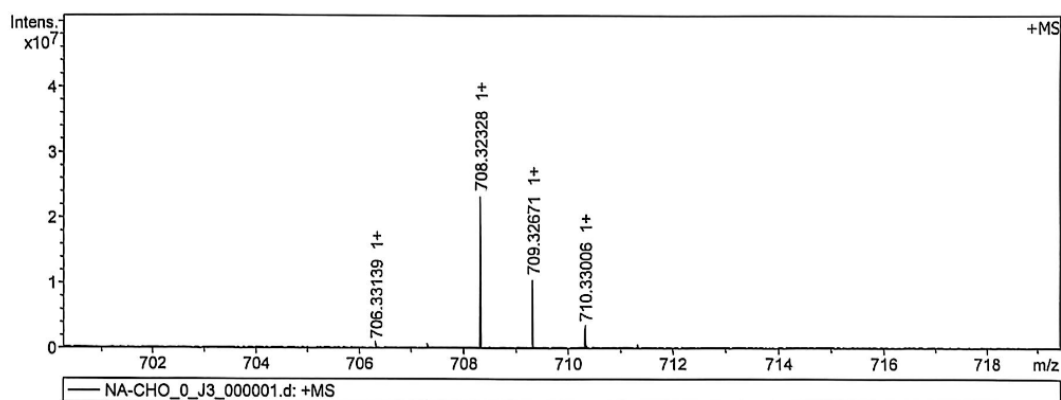

| Meas. m/z  | # | Ion Formula                                    | Score  | m/z        | err [ppm] | Mean err [ppm] | mSigma | rdb  | e <sup>-</sup> Conf | N-Rule |
|------------|---|------------------------------------------------|--------|------------|-----------|----------------|--------|------|---------------------|--------|
| 708.323280 | 1 | C <sub>50</sub> H <sub>44</sub> O <sub>4</sub> | 100.00 | 708.323411 | -0.2      | 0.1            | 45.8   | 29.0 | odd                 | ok     |

Figure S87 HRMS spectrum of compound 19

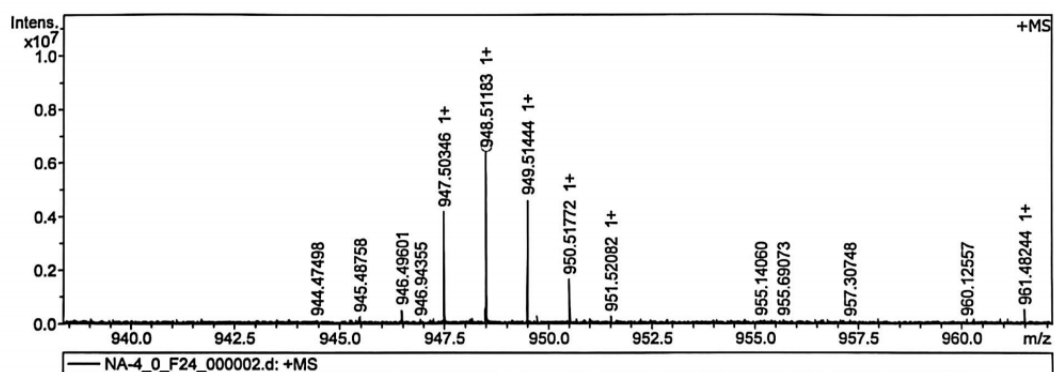

| Meas. m/z  | # | Ion Formula                                    | Score  | m/z        | err [ppm] | Mean err [ppm] | mSigma | rdb  | e <sup>-</sup> Conf | N-Rule |
|------------|---|------------------------------------------------|--------|------------|-----------|----------------|--------|------|---------------------|--------|
| 948.511830 | 1 | C <sub>68</sub> H <sub>68</sub> O <sub>4</sub> | 100.00 | 948.511212 | 0.7       | -0.2           | 19.4   | 35.0 | odd                 | ok     |

Figure S88 HRMS spectrum of compound 20

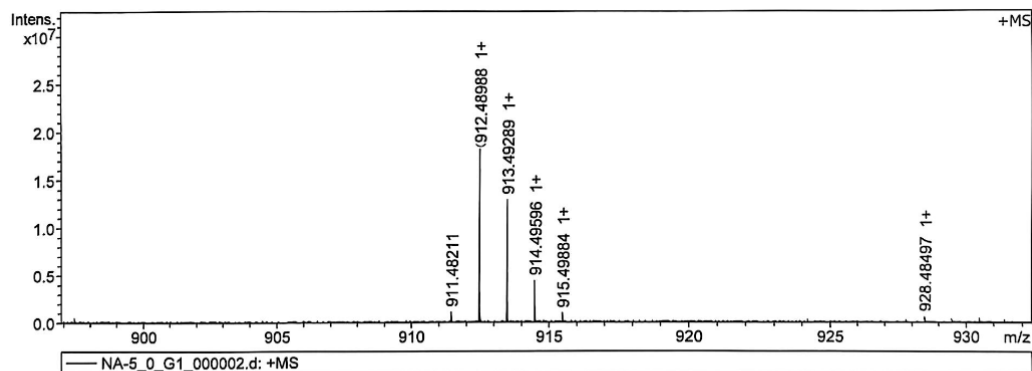

| Meas. m/z  | # | Ion Formula                                    | Score  | m/z        | err [ppm] | Mean err [ppm] | mSigma | rdb  | e <sup>-</sup> Conf | N-Rule |
|------------|---|------------------------------------------------|--------|------------|-----------|----------------|--------|------|---------------------|--------|
| 912.489877 | 1 | C <sub>68</sub> H <sub>64</sub> O <sub>2</sub> | 100.00 | 912.490083 | -0.2      | 0.5            | 24.5   | 37.0 | odd                 | ok     |

**Figure S89** HRMS spectrum of compound **21**

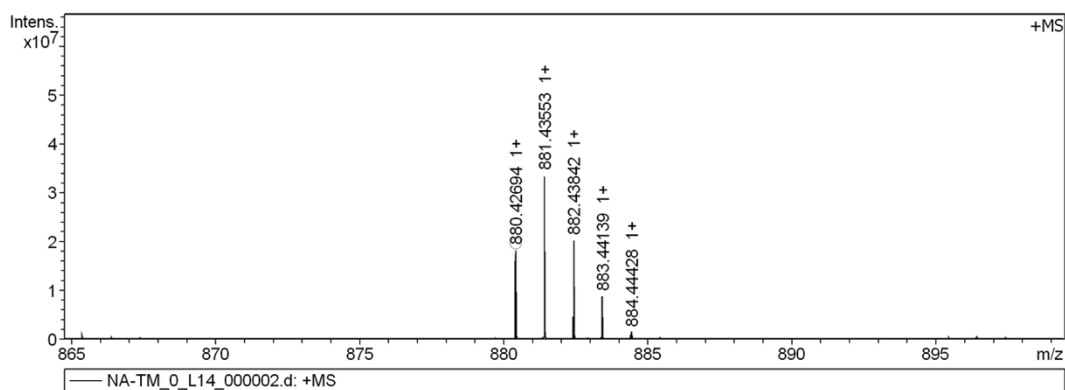

| Meas. m/z  | # | Ion Formula                                    | Score  | m/z        | err [ppm] | Mean err [ppm] | mSigma | rdb  | e <sup>-</sup> Conf | N-Rule |
|------------|---|------------------------------------------------|--------|------------|-----------|----------------|--------|------|---------------------|--------|
| 880.426943 | 1 | C <sub>66</sub> H <sub>56</sub> O <sub>2</sub> | 100.00 | 880.427482 | 0.6       | 1.4            | 15.3   | 39.0 | odd                 | ok     |

**Figure S90** HRMS spectrum of compound **3**

## 17. Reference

- [S1] M. J. Frisch, G. W. Trucks, H. B. Schlegel, G. E. Scuseria, M. A. Robb, J. R. Cheeseman, G. Scalmani, V. Barone, G. A. Petersson, H. Nakatsuji, X. Li, M. Caricato, A. V. Marenich, J. Bloino, B. G. Janesko, R. Gomperts, B. Mennucci, H. P. Hratchian, J. V. Ortiz, A. F. Izmaylov, J. L. Sonnenberg, D. Williams-Young, F. Ding, F. Lipparini, F. Egidi, J. Goings, B. Peng, A. Petrone, T. Henderson, D. Ranasinghe, V. G. Zakrzewski, J. Gao, N. Rega, G. Zheng, W. Liang, M. Hada, M. Ehara, K. Toyota, R. Fukuda, J. Hasegawa, M. Ishida, T. Nakajima, Y. Honda, O. Kitao, H. Nakai, T. Vreven, K. Throssell, J. A. Montgomery Jr, J. E. Peralta, F. Ogliaro, M. J. Bearpark, J. J. Heyd, E. N. Brothers, K. N. Kudin, V. N. Staroverov, T. A. Keith, R. Kobayashi, J. Normand, K. Raghavachari, A. P. Rendell, J. C. Burant, S. S. Iyengar, J. Tomasi, M. Cossi, J. M. Millam, M. Klene, C. Adamo, R. Cammi, J. W. Ochterski, R. L. Martin, K. Morokuma, O. Farkas, J. B. Foresman, D. J. Fox, *Gaussian 09, Revision E.01*, Gaussian, Inc., Wallingford CT, **2013**.
- [S2] P. J. Stephens, F. J. Devlin, C. F. Chabalowski, M. J. Frisch, *J. Phys. Chem.*, **1994**, *98*, 11623-11627.
- [S3] S. Grimme, J. Antony, S. Ehrlich, H. Krieg, *J. Chem. Phys.*, **2010**, *132*, 154104.
- [S4] P. C. Hariharan, J. A. Pople, *Theor. Chim. Acta*, **1973**, *28*, 213-222.
- [S5] F. Furche, R. Ahlrichs, *J. Chem. Phys.*, **2002**, *117*, 7433-7447.
- [S6] Z. Chen, C. S. Wannere, C. Corminboeuf, R. Puchta, P. V. R. Schleyer, *Chem. Rev.*, **2005**, *105*, 3842-3888.
- [S7] D. Geuenich, K. Hess, F. Köhler, R. Herges, *Chem. Rev.*, **2005**, *105*, 3758-3772.
- [S8] Z. Liu, T. Lu, Q. Chen, *Carbon*, **2020**, *165*, 468-475.
- [S9] T. Lu, F. Chen, *J. Comput. Chem.*, **2012**, *33*, 580-592.
- [S10] K. Kamada, K. Ohta, A. Shimizu, T. Kubo, R. Kishi, H. Takahashi, E. Botek, B. Champagne, M. Nakano, *J. Phys. Chem. Lett.* **2010**, *1*, 937-940.
- [11] J. K. Mahey, C. B. Pawara, S. B. Kamble, *New J. Chem.*, **2023**, *47*, 18419-18429.
